# Supplementary material for: Insect Innate Immunity Database (IIID): An Annotation Tool for Identifying Immune Genes in Insect Genomes
Source: PLoS One. 2012 Sep 12;7(9):e45125. doi: 10.1371/journal.pone.0045125 (PMC3440344; doi:10.1371/journal.pone.0045125)
Supplement: Table S3 — A complete list of Nasonia giraulti putative immunity genes reported in the IIID. (XLSX) [file pone.0045125.s003.xlsx]

## Sheet: Sheet1
Table S3. A complete list of Nasonia giraulti putative immunity genes reported in the IIID
NV_GeneName	NG NCBI Name	Scaffold	BPs	Complete_Sequence	Complete Length	eValue	%ID	NV_Length
2-Cys thioredoxin peroxidase	ES618790	7	4 to 672	CCGAGAGAAGACAAGCTTTCTCCATTCCAAATTTT-CAGTCTCCACGTTTGCATATTCGAATCAACATGCCAGTCCCAGCTATTCAGAAGCCAGCTCCGGAGTTCAAGGGAACCGCTGTTGTCAACGGTCAGTTTAAGGACATCAAGCTCTCTGACTACAAGGGCAAATATGTCGTTCTCTTCTTCTACCCTCTTGACTTCACCTTTGTCTGCCCAACTGAGATTATCGCATTCTCAGACCGTGCTAAGGAATTCGAAGCCATCGGAGTGCAGTTGATCGCTGCATCCACTGATTCCCACTTCAGTCATCTTGCATGGATCAACACACCACGTAAGCAGGGAGGCTTGGGTGAAATGCAAATTCCCCTTCTTGCTGACAAGAGCGCTAAAATCGCACGC…	670	0	98.4	670
Actin binding protein| putative	GL275593.1	5	3,685059 to 3,685,510	GGTACGATTCCATCTCATTTGCTCAATCGAAACGGCAGCCGGTCAAATAGTCCATTGCCGAATCACCAACCAACACCCACGTCCGTGGTAACAGCGGGTGGCGTCCATCTTGGCCAGATGATGCCCATGAGTGTAGATGAAACCGAATCGGTGCCGCAGGATCTACCACCGCCACCTCCGACTCCGGATCCGGTACCAACAAGACCGGTTTCACCACCATGCAACATACCGCCGCCGCCTCCGCCACCGCCACCGCCACCTATAACAAACGGACCGGCGATGGCGCCTAACATGCCCATGACCAACGGCGACATTGCCAAAATGATTGCTAGCAACCCTCCGAAGCTCAAACCATTGAAGAGCATCGTCGACGGACAGCTAAGAAAGCCTGGTAATCCC…	455	0	99.1	1800
Agrin	GL274664.1	33	878,279 to 882,366	AACCTTTTCTTTCACTTGCGTATTTTTAATTATGAAATAGAAGAAAGAACGATTTCGAAGCTGTGAAATTGGTTCGTTTTTAGAGAGAAAGTTATTCTGGCTGGAATTTTAATATCGTTAAAGGCCACTTCGGGTGCAATGATGTCTACTACAATTTGGTGAAAATAAGTGAAGTGCATTCGTGAAAATTGAAGCATGAGAACAATTTATTTCGCGAAATTAAAAGTTTGCTTAATTATTCACGAGTTTTCATTTATTTAAAANNNNNNNNNNNNNNNNNNNNNNNNNNNNTAAGAGCCACTTTAAGTAGACAACTCTCCGGTTGCGTTCTATATTNNNNNNNNNNNNNNTTTGCATTCTCCGAAATTTCAAAACTTTTCCTCCAGAATCTCATACATA…	4093	0	97.3	28567
Alpha-2-macroglobulin precursor splice variant 1;TAM	GL274307.1	42	1192782 to 1193688	AGGCTACCAAAGGGAATTGAATTATCGACACCCCGACGGCTCGTACTCGGCGTTCGGCGCAGCAGCGGACGAAGCGGGTAGCGGCTCGATGTGGCTAACGGCCTTCGTTGTAAAATCTTTCGCACAAGCCCGCTCCATTATCCAGATAGACGAGCGCGATCTGAAGCTCTCGGTCAAGTGGATAGTTCGCCGCCAGCTGGAGAACGGCTGCTTCCCGGTGGTCGGCCAAGTCTTCCACAAGGACATGAAGGGTGGCCTCCGCGAGGAGGACGGCAGCTCCTCGGCCCTCACGGCCTACGTTCTCATAGCTCTGCTCGAGTCCGGAGTACCTCTGAGCGCAGCCCTCGTTAACAACGCTCTCTACTGTCTGGAGAAAGCCAGCGTGTCCGACCACTTTGC…	907	0	99	6315
Anaphase promoting complex subunit 10	GL276289.1	17	1087231 to 1086938	CAGGATAAGCATAAGAGCTGGAACAAATTTCAATGACCTACAAGAAGTCGAAGTTATGGATCTTAGTGAACCAAGTGGGTGGGTGGTGATACCTATNAGANNNNNNNNNNNNNNNCCCATTAGAACTTTTATGATTCAGATTGCTGTCATAAGCAATCATCAAAATGGACGAGACACCCATATGAGGCAAATAAAAGTTCATAGTCCAGCAGAGGATATTCTTGGGCCACATTCTCAATTAGTGCCAGGACGTTTTCTTACAAATGAATTTCAAAGATATGCTACCATTAGATAG	295	5.8e-142	95.9	570
Annexin IX-A	GL276289.1	17	810690 to 810307	AGTGCACCCCTACGGTGTACCCAGCAGACCCCTTCGATGCCAATGCAGATGCTGGAGTGCTCAGGAAGGCCATGAAAGGCTTTGGCACCGATGAGAAGGCCATCATCGATGTTCTCACAAAGCGTGGAATTGTCCAGCGACTAGAAATTGCTGAGGCCTACAAGACCCTGTATGGAAAGGACCTAGTGAGCGACCTGAAGAGCGAGCTCACTGGAAAATTGGAGGATGTCATTGTGGCACTTATGACCCCTCTTCCACACTACTATGCCAAAGAACTGCACGATGCTATCTCTGGCTTGGGTACTGATGAGGAGGCACTCGTTGAAATCCTCTGCACTCTGAGCAATTACGGAATCAGGTCCATTGCTGCATTCTATGAGAATT	384	0	98.7	1396
Annulin	GL275842.1	116	589606 to 589957	GGGAGAACTACAGGAACTCGGTGCTGACGATCGTGCACGTGGACTACTGCGTGGACGACAACGGGGACGCGCACCGGACCTCGCGCTACGAGCTGATGAACCGCGAGGACGGCGGCGCCCGGCTGGTCGTCCGCCGCGGCCAGCCCTTCGTCGTGGACCTGGCCCTGTCGCGCAACTACGACCCGGCCATCGACGGCATGTCCATCGTCTTCACGCTCGACGGGGTCAAGAGGCCGCAGTACGGGCACGGCACGCTCGTCGCCTCGCCCGTGCTGCACCCCGGCGAGCTCTCCGAGGGCTCCTGGCAGACCGTCCTCGAGGCCTACGCCGAGAACTCGCTGCGGATAAAGGT	352	1.01e-180	98	2205
Anti chymotrypsin-2	GL2755953.1	5	4332739 to 4332525	ATGATATTGACGAATACACAAAAGTAATACTGATAAATGCTCTATACTTTAAGAGCAGTTGGCTAAATCCATTTGAATCACAGTTTACAGAAAAAAGAAAATTTTTCAATATTGATGGTATTGAAACATATGTTCCAACTATGCACAAAACATTTAATGTATTACATGGTCATATTAAAAGTCTTAGATCAAGTTTTATTAAAATGAAATATTTG	215	1.25e-108	98.6	1230
Aspartyl-tRNA synthetase	GL276600.1	47	1283137 to 1284720	ATGACGTTGGATAACGAAGCGGCGGCCGCTCCGACAGAGGAGAACATTTCTAAGAAGGCTTTGAAAAAGCAGCAGAAACAGGAGGAAAAGCAGGCGAAGAAAAAGCCCGTAGAGGCCGAGGCTGCGATAGTACAGGAGGATACGTCTGTGGGAAAATATGGCCAAGTCAAGATGATTCAGAGTGCTGAGCCGCACGATGAGAGGAAGTTTGCACACATCAAGGATTTGAACACAGAGCTGGCAGGCCAGGTTGTGTGGATCAGAGGTAGACTACATACGAGCAGAGGAAAGGGAAAGCAATGCTTCATTGTTGTTAGACAGCAGTCCCATTCTATACAAGGTTTGGCTGCTGTCAATGACAAGATCAGTAAGCAAATGGTCAAATTTATATCTGGTGTG…	1584	0	98.8	1584
Basket| isoform B	GL277306.1	29	414084 to 413671	CAGCAGCACAATAATCTCAACAACGGCCTACGACCGAACCGACCCAATTCCCTCCCGGTCGGCTTCGACAACAACAACCAGCAGCGACCCACCTCGCTGCCCATCTTCACCGAGCCGAAGCCCCGACCGTCGACCTTGCAATTCAAGACGATCGAGACCCCGGCCTTCATGAAGACTGCCGCGGAAGTCGCCGGTATCCCGATCACCACCCCGTCCAGCGGTATTCCCTTCAACTTCGATTCCCTCATGGAGGGCGGCACCGGGCTGACGCCCGTCTCGACGCCCCTCGTACCCTCCTGCTCCAGCCAGCAGAGGAATAACGGCTCGAACAGTAACTCCACTGGACACCACCACCTCTCCGCCGTCGATCTCAGCTCGCCCGATGCCAATCCGCCCAAA…	414	0	98.3	1164
C-type lectin	GL276708.1	108	122071 to 121361	GTATTGGCAAACCCCAACCTGACAACCGTGAGGCCATCCAAGGTGGAGCCCCCGAGAACTGTCTGGCTGTGCTGAACCAGTTCTACAACGACGGTGTCAACTGGCACGACGTTGCCTGCCACCACAAGAAACCATGGGTCTGCGAGGAGAACGACGCGCTCCTGAAGTACGTGCGCTTCACCAACCCCAACATCCGTGTCTAAATCGACGAATCACTTGAAATTTTCGATTTTCAAAGTCACACGTGGTTTCACTGGCGTCCGGTCACAATCCAATGAAGCGAAATTGTATATCGTTCCATTTACGGCTTATGGCCAATCGTTGATGCGAGACTGACGAGTGACTGCAGAGGATCTTTCGAATAAGCTTCGACATTCCGTCGGTCACTTTATAATGCCT…	720	0	97.2	1240
Cactin	GL277752.1	21	921356 to 923882	AATAAAGACAACTTTTGAAGTATAATACAAGATCCCTGAATTTTTTACAAAAAAGCGTCTATCGACGGTATCGGTATCTTTTGAAGTGGAACCATAACTGAAAGATATTGTTGTGGAATTGGCAGCGGAATCCGCGTTTATACGAGTACTCCCACTCTCGGTTGACTATTTTGAAAGCTATGTCCTCGTAAGGTGGTCCAGCTTTGAATCGTAGTATCGCGAAGTCCTTGTTATCTGTACACGGCGTCTGGAAAAGAAAATTTTGCATTAGTAACACGATGCGCTTGAATTGTATAAAGAAAACCATTATTGGATTATAAATAATGTCTTACCAAGAAATACTCAGGTGTAACGTTTTTATCTATCAGATCCGGATAGAAGATATTGAATTTGTATCCT…	2534	0	98.5	2534
Cactus maternal/zygotic protein	GL275162.1	4	2054787 to 2054182	CCTCATCCTTGTTTGCTGAACATCATAAACGACGCTGCCCAGACAGCATTACATCTTGCAGTATTAAAGAGTCAACCCAGAGTGGTGAGACGGTTGATACTGGCTGGAGCTGATCCCACTATAAGGAATTTCAAAGGAAACACGCCGCTTCATCTTGCCTGCAATTCTGGAGATCTGAACTGTGCGAAAGCCCTGACCAATCCAATCACACCTAACGAACGAACATGGCTGGAGCCAGGCAAGACGGTACCTTCCTTACCCCAGAACCTGGAGCAACGAAACTTCGATGGCGAAATGTGCATCCACCTAGCAGCATCCCAGGGTCACGCCGAGCTGGTCCGCCACCTGTTGCTCCTCGGCGCCGACCCCGACGCACGCGAGGGTCTGAGCGGCCGCACA…	894	0	97.9	1336
Carboxy Peptidase A	GL277800.1	161	102182 to 101780	ACAAGACGGTACAGCGACCAAAGTTTACCAGAGACTGGAGCAGGCGTCCCATATCTCTTACGGATCTCTGACGTGGGAGCAAACTTTGAACGCGATTTTGTTCAGATCGGAAACTCCCATCACCTACAACAACTACACGTCGCCAGCGCACTATTTGTCCAGAGCCATGGAGACGGTCGAGCTGCCGACACCCCAGTGCGACAGAAAGCTTCGATTCTGCACAATCGGCGACATGGAAACGAATAAGTGTAACTGGACGTCGGCCGCTACGCGCATCCTCGGCATAGCTCCGGAGGTGAACTGCGTCAAAAGTGACAATGTCTTCCAGTGCTTCGAAAAGCTTTCGAACAAGGAAGCCGACATCATCAGCATCGACTCGAACTACGGACACTTGGCGCG…	403	0	99.3	3084
Caspase-1	GL274726.1	20	280278 to 280530	ATGCTTAATCTGGTGGCCGAAGCACAAGGTAGGATGTCGACAGAGATGGGCGCCGACCGCTACAACATGGAGAATCCAAATCGTGGAAAATGCGTTGTCTTTAATCACGAAATTGTTGCCACTCACCTCGAGCCTCGCAAGGGCTCGAGCGTCGATACGCGTAAAATCAAGCAGACATTTCAGCAACTCGGCTTTACTGTCGACATCTGCAACGATTACGAGTACTATGGTATCATAGAAAAGCTCGACGAGC	253	2.52e-127	98	831
Caspase-1	GL274726.1	20	1615640 to 1613735	GTGGCAGAAATGGATCATTCCCAGCACGACTGCCTAGTCGTCGCAGTACTAAGTCATGGAGAGCTTGGCTTGCTGTACGCTCATGATACACCGTATAAGGCTGATACAATCTGGTCACACTTCACATCAGATAGATGCCCTACTCTTGCTGGTAAACCTAAACTATTCTTTATTCAAGCTTGTCAGGGTGACAGGCTTGATGGAGGAATCACTTTGAAGGAAAGGACAGAGACCGATGGCCAACCTACTGTAACATTCCGCATTCCTACACATGCAGATTTCTTGATTGCCTACTCAACTGTGCCAGGATTTTATTCTTGGAGAAACACAACTCGTGGTTCATGGTTCATGCAGGCTCTCTGCTTGGAGCTCAAGGAGAATGGTACTCGCTATGACTTA…	1908	0	98.7	2471
Catalase	GL275079.1	34	1251215 to 1250658	GGCATTCGCGACCTGTACAACGCGATCGCCAAAGGCGATTACCCGTCCTGGAGCTTCTACATCCAAGTGATGACGGCCCGAGAGGCCGAGACGTCAGGGTGGAATCCCTTCGACCTGACAAAGGTCTGGCCCCACAAGGAATTCCCCTTGATACCGGTCGGCAAGCTGGTGCTCGACAAGAATCCGGAAAATTACTTTACCGACGTCGAGCAGGCTGCCTTCGACCCTGCTCACATGGTGCCCGGTATCGAGCCCAGTCCCGACAAAATGCTGCAGGGTCGGCTCTTCGCATACGGCGACACCCACAGGCACCGGCTGGGACCCAACCACCTCCAATTACCCGTCAATTGCCCCTACAAGATGATGCCGACGATAAATTACCAGCGCGACGGCTTCATG…	917	0	99.1	1479
Cathespin L-like protease	GL277513.1	39	446687 to 446320	GGCAGGCGCGCTGGAAGCCCAGTACTTCAAGAAAACCGGCGTCCTCACAGCTTTAAGCGCCCAGAATCTGATCGACTGCACGATGGAATACGGGAATCTCGGCTGTGGCGGTGGTAGCGCTGCCCTGTCCTTCCAATTCGTCGTCGACCACAAGGGCCTCGAGCCCGAAGCTAATTACTCGTACGCGGGTCGAACCAACGAGTGTCCCTACAATACGAGTGACGACGAGGACGAAGAACTCGACGCGAGTTTCATCTACGTCAACGGCGGGGATGAGGCGACGCTCAAAGTAGCCGTTGCAACGGTTGGCCCTTTTTCCGCTGCGATAGATGGCTCGCACGATACTTTTAGGTTTTACTCGGAAGGTG	368	0	98.9	1062
CD36 antigen	GL275593.1	5	110385 to 110744	GGCATGCACGAGCTGCCGAACAACCTGAACAACAAGTTCTTCCTCTACCTGAACGTACTGCCGGCGATGCAGGAGGTCGCGATCTACGGCCTCTTCCTGGCTGGGGCGATCAGCCTGGTCTGGAGCGTCGTCAAGATCCTCACTTACAAGCCGAAGAGCTCGGGAATGACGAGCCAGTGGCTCGATGCCGAGATGCAGCGCAAACGACTCAACTACCTCAATGAGAGGCGACCGTCTCTCAAGGCCAAGGAGATGGACGTCTATTTCAACGCGCTGCTCACGACCAAAGAGGAGGAGATCGAGCCGATCGAGCCATCGGCGCTCGAGGAGTTGCCCAACCTCAAGGAGGACATCGTCTGA	360	0	98.3	1815
CD36 antigen	GL274356.1	13	1127943 to 1128237	AACACTGTCTTTGAAAGCTGCTGGTACCGGCGAATGGATGGGTTTAACAGGAAGTAAATTTGTATCTGACGAAGATATGTTTGATAATGGAACAAATGTTGAAGCAAATAAGTGCCGATGTGAAGGAGTCGAATGCCAACCCAGCGGAACATTAAATGTTTCTTCATGTAAATACGGTGCACCCGCTTTTGTCAGTTTACCACACTTCTACTTGGCGGACGAAAGTTATAGACAAAATATTACTGGAATGAAACCAAACAAAGAAGATCATGAATTTTTATTAATCTTGGAGCCG	295	2.92e-158	99.7	1704
Cell Adhesion Molecule	GL276173.1	6	1919390 to 1920198	TAGGCAGTGCGATGTCTTTAAAAATAAGGATAACGCTCCTTATTGGAATAGTAAGTGCAGCGGTTTCTCAGACAGCTTATTACAATGAAATCGAACACAGATGTCCTAAGCCATGGATCATGTTCCAAGACTCTTGCTATCGATTCATAAAAAGTTTTAGGCCAAGAGAGGATGCCAGGAGAAATTGTCTAGCTTATCAAAGTGATTTGCTTTCCATCAACTCTCTTGATGAACATGGCAACATACTTCGTGAATTGTTTCTACAAGATCCGCAGCATCGAAAATGGTACACTGGAATAAAGCTGCAAGGTGCCTATTGGACAAACGAAGATGGCACTCAGTTGATCAACATGGAAAACGCATTTTTACCTGAAAAACCAGATAATTACTATGGAAAAG…	809	0	99	2934
CG11824-PA	GL274178.1	2	1257614 to 1256437	GCCCTTCCAGCCTAACGTCCTGCCGATCTGCATACCCGACGACGACGAGGACTACGTCGGCCAAACGGCCTTCGTCACCGGCTGGGGCAGACTCTACGAAGATGGACCGCTGCCGTCGGTACTGCAGGAGGTGGCCGTGCCGGTGATAAATAACTCGGTGTGCGAGGGCATGTATAGAAACGCCGGCTACATCGAGCACATACCCCACATTTTCATCTGTGCCGGCTGGCGGAAAGGCGGCTTCGACTCCTGCGAGGGCGACAGCGGAGGCCCGCTGGTGATTCAGAGGAAGAAGGACAAGCGCTGGGTCCTGGCCGGCGTCATCAGCTGGGGCATCGGCTGCGCGGAGCCCAACCAGCCGGGCGTCTACACGCGGATCTCCGAGTTCCGCGAGTGGAT…	1432	0	94.8	4066
CG14892-PA	GL275793.1	16	2857967 to 2858574	GGGCGACTCTGGCGGTCCACTGCAGTGTCGTAGGCCCGACGGCGTTTGGCAGCTGGTCGGCGTGACGTCCTTCGGCTCGGGCTGCGCCAGGCCTGGCTTTCCAGACGTCTACACCAAGATTCAGTATTACTCCCCTTGGATCCGGGACACCATCGCCAACGACGTCAACAGATAAACGCGTCGAAACCGGCTAATCTTATTTCATCGCTTATCGCCATCGCCGTCATTGTACTTGTACATAACTCTGTATATAACTTTTAACTACGTTATTGTTGAACTATTTTGTCAATTGTTGCACTAGTGTGTTTATCTTATTTNNNNNNNNNNNNNNNTTTAGTTTTAGAGCTTTTACACGTATATGCGCATTGTATAATAAGATACGAAACGAATAGCTTGTTA…	608	0	94.1	944
CG14895-PB	GL275601.1	30	697628 to 696740	TGACGAAGAGGTTTATAAAGAACTGAGAAACATTTGTCAAGGCGATGATCCACAATTGAGATTTGAGAGAAGTAAAGAAGTTGGGTCTGGCTCTTCTGGTAGAGTATTCATAGCTACCGATCTATCAAACAACCAGCGAGTAGCCATTAAAGACATTGATCTAGAAAAGCAAATTAAGAAAGAGCTTATGCTGACAGAGATCAAAGTCTTGAAAGAATTCAGACACCCAAACTTAGTGAATTTCTTAAACTCTTATCTAGTCGATGATCATCTCTGGGTGGTAATGGAATTATTGGAAGGTGGACCGTTAACCGATGTTGTGACTGAAACTGTGATGAAGGAAGCTCAAATAGCTGCTGTATGTCGTGAAGTGCTTAAAGCAGTGAGTTTCTTGCATTC…	889	0	99.2	1245
CG1632-PA	GL277538.1	9	2092557 to 2092178	GAATCGAGGGCGAGGACCTGCAGGTGCACTTCGACGTGCGCTTCGACTCGCGTTACGGTAGCCTCGAGTCGAGCGACGTGCTCGAGGTGCTCGCGAGCGAGATCGATCCCTCGACGACTCGTTTCTTCGCCAACCTGACCATCGACCCCGCCAGCCTCGAGGTCCAAGAGAGCATAAGCGCCGCGAATAAATTAGCTCTGCAGACCAACTCGACGACGGCCGAGATCCCGAGCTCCACCACGACGCCCAGACCGCCCAGGAGGTGTAGCCCCATCGAGTTCTCCTACTGCAAGCATCTGCCCTACAACGTCACGTCCTACCCCAACTTCTTCGGGCACAACGACGCCCGCGAGGTCAACGACGATATCATCGCTTTCAGG	380	0	98.9	2546
CG16713	GL274402.1	82	399796 to 409674	TTATGAAAATAACGAGTACCTTTAACATTCATCTGAGTTTTCAGAATCATCGTAAATGTTGAAAATTGAATTCAAAGAGATCACGTTGTCATTGAGACTAATCAACGATATTTTTCTTATCTGAAATTCAGTATTTACAATTTTAACCGCAACCTTAACTTGTCTTACATCTTATTCCTTAAGAACAATTCAGTAGATAAAATAAATTATTATCTTTGGAAATATAAACGTAAAGATAAAATAAATTGAATATATTTGGACAATATAGTTAATTGCTATCCTATTATGATGATTGTGAAGTGTGCTGTGAATCAACACTGGCCACCAAAGCGTTGTTATTTTACTTGCGCAAAGAATATGTGTTATACATATATAAGATAACATTGATAAATAAAATTA…	9879	0	97.5	9866
CG18735-PA	GL276749.1	7	2604902 to 2604679	CAGGATCAACGTATCTGGGCCAAGTGGGCACCCTAATGGGATGGACCGAGAGCAGCGGCTCCCTAAGCGATGGAAATCCCGACACGAGAACCTGTCGGCCCCGTAAGCTCGGACTACCCATCCTCGGCAGGCGCGAGTGCCTCAAGAGCGGAATAAAGCCGGAGAATTATCACGAGGAAAGCGGGTGCGTCGGGATTATCGGATCCAGCTCCATCGTTTGCCAC	224	1.13e-115	99.1	981
CG2930-PD	GL276600.1	47	230907 to 231493	GTATCGGAGAACCTCACGCTTGTAGAAAAAACTGCAACTTCCTGGGCCCTGACGATCGAAGGCCTGAGCCCACCTTTCGCAGATAGCGTTGAGAAATCGGGAACCGGCGACCCATTTGTGCGCGCTTTGATCTACAAGACTACGTCAAAAATCAACTCGACCATCAATTTTAACGGCGAGAAAGAGAATCAAATCAACATCACCAAAAAGCTCCAATTCACCGAGTTCGACAAAATCAATCACAACCCGTACAACATAACGCTCGACGGAAAACCCGTTGAGGATAACGTGTTCTTCAGATTCGGTGGTGTTTACAACATAATCGGATACGCTTCAGACACAGATGCAGCTGCCAAAACTGTGACTCTAGCCGATCCAAACTCTGTGCACATGTTCTGG…	587	0	97.8	2187
CG3083-PA (LOC100117827)	GL275453.1	15	75361 to 75643	AGAAAGGAGAGCCAGTTATGGTAGTGCCTACAATTTCTGATGAAGAAGCCAAAAAGACTTATGGTTCCAACATGAAGACTCTTTCTTTGCCTTCTGGTAAGCCATATCTTCGTATAGTTCCTCAACCAACTGATTCCTGAAGTTTTGTTTTGGAAATATAAAATAATAATAAATACAAGTACGACTGAATAATTACATTTAACAGGATTTAATGTAACTTTTTATACAGAGACAAATTTAAAGTTGTATTTTTATGCTGTTTGAAATAAATTTTTTATTTAAT	283	1.36e-151	99.6	913
CG32019-PD	GL275793.1	16	3051679 to 3062846	GACGAAAGAAATTCGCGATACAATTGCATGCCCATATATTAAGGTCATCGTGATAAACTGTTAAAAATCAAGAAAGAATGACTTGTCGAGTCCGTYKYTRTTYWTYWTRRMRCASYMSYKGTTRYYCRCKYMGMCCMYMGMWAKYCGAATYMAWSSYARRSWRKMSMRTRMTTYATMRCYTMMWYRWRRCSGAGRTTGGAGTTGTGGTTATCAAGTATAMCSAKSTTMTTSTCRMKGYKCCRATRYKCWCTACTCGTATCTCTCAATATTGTCTGGCGCCGCTTGAAATGCCAAAAATTAGCTTTTTATTTTTACTTTTCAGTTATTTCCTTCTATCGCTCTTCTTTTTATTATTTTAAAATTTTTTCTATATTCTCTTATGCCTGCGATGGATGTTTA…	11295	0	98.8	32757
CG32226-PA	GL277646.1	11	125942 to 125546	AGATAGAAATAACAATAAAAGAATTTGATTCATCACAGGTTAATCCTGGATCATGGAGTCCTGTTCATTCTGTTGGATCAGTAGTTGGTGCTGAGGCCCATCCAGAAACTGATGGAAGCGTTTTTGATCCTGATTTAACTGGTGATTCTGGCGTGTTTGGAGAAGACGAAAGTGCTGCTGCTATATATTGGGCTGAATGTGAAATGCTTTGGTGCAAAGTAGAGGCAGGGGCTTGTTTGGTTGACCTAAATAATCCACCAAAATGGATAACAGACGGAAATGCATCGAGTCAGGGTGAAATAGCTGAACCGTGGAGGATTCGCATTTTAGAAGAATTAAAAAATAGAATTAAAGGACTTGATTTTGATCTCTCGTTGTGCGAAAAAGCTATTGAAAA	397	0	99	3654
CG33141-PB	GL275180.1	44	118617 to 118714	GCTTCGAAGTCGAGCTACATAGGCAATCCGAGCCCTGCTCCACCCTCCGACGTAAATTTCTACAGCGTGGAGGTGGAGAGCGGTCGCTTTATGGGATATGAGTCGAACCCGAGCCCGGCCCCAGCCTCGACGATCCTCGAGGGCCCGGGCCCGGGCGCCTACTATCCTTCCCTCAGTCCTGCCTCCGGCCACCACCATCACCAGCAGCAACAGCAGCAGCACCAGCTCAACCAGCAGCTGCAGCACCAGCAAGGGGGCAACAGCGCGGTGGGCCTCGGCAGCCACGGGACGAGCCTCCTGATGGGCGTGGGTGGCCCCGGCGGCGGCCTTGGCTTGGGCTCCGGCATGGGCACGCTGACCAGGACGCGGACCCTGCCGCGGCCTGTGCCCCCCCCAGAC…	444	0	99.8	5805
CG3430 isoform 2	GL277196.1	129	166556 to 166922	AGCCTCATGAACATGTATTAGTCAATTCGAATAGTAATGAAACTGCAGAAAGACAAACTTGGATTGTAATTTCCATACCAGGATTAAATGATTGGGCTAAAGAAAGTTCTTCTATTCCAAAAGATCAAATGGTAACACCTGCAAAGTCAAATATGAATGAACGCAGTAAAAGGTCATTGGATGAAACACACGATGAGCCAATGGATTGTTCAGAACCAGTTAAGAAAAAAGAAAAAGTTGTCACAAATGATTCTGATGCTGGTCCATCTCAATCACAAAACTCAGAAACTCCTAGAATAGTTTCTCAAGATCACATTTTAAACTTTCCAATACCAAGCAAAAATGAAAAAGCTTGTATTGTAAAAGT	367	0	98.4	1806
CG4386-PA isoform 1	GL276749.1	7	2602158 to 2601942	TTTTTAGAATAAAGAAGAAGGACCTGAGCCTGGGACTGGGCATCCACGACGTTCAGAAACTCGAAGATGGTCTGATACTTCCTGCCGGTCAGCTGATAATCCACGAGGAGTTTGACAGCGACAACCTGCACGATTTCAACGACATCGCTCTGATCAAGCTGAAAGAGCCGATCGAGTTCACCCAAGACATCAAGCCGGTCTGCTTGCCTCAAAAAGG	217	3.45e-106	97.7	1635
CG4998-PB	GL277546.1	89	798080 to 799312	TGTGATGGCACCGAAGAGAGACGCCCGTACTACTCGCCACACCGTGACATCCATCCGCAAGAGGTCATCTACGCCCAACCCGTTACCATCAAACCGGTCGGCCGTCCACTGCCGGCTATTCCGGTCAAGCGGCCTGGTGGCTTCGGAGGACTTGGAGGTCCCCATAAACCTGGTTTTGGATCCGGTCCAATCTACGCCGGACACGGAGGACCACCCCCATCCTTCTCAGGTCCTGGTGGCCCACCATTCTCAGGACCCGGCGGCCCATCTTTCATCGGTGGCCCACCACCCAGCTTCTCTGGACCCTACCCCGCTTACAAGAAACCCGGCGTCATCCACGGCTCCAAGCCAGTGTACGAGTCCGGATTCGAGGGTGAAATCGACTACGAAGACAAGTTC…	1233	0	98.6	3778
CG5520-PA	GL277846.1	41	237994 to 239992	CAGCTTGCACATGAAAGATGAGGCTTCCGACTTCTTGGAACAAGACACCATCAAGAATCTCATCAAGAAGTACTCGCAGTTCATCAACTTCTCCATCTACTTGTGGAACAGCAAAACCGTCCAGGTTGAAGAGGAGGAAGAGGAAAAGGCTGATGTTGAGGGAGACAATGAGAAAACCGAAGAAGAAAAAGAAGAAGAAGAAGAAGATGCCAAGGTAGAGGAAGCTGGCGAGGAGAAAGAGAAGAAGAAAGTTAGCAAGACCATCTGGGATTGGGAACTGCTGAACGACTCCAAACCAATCTGGACTCTGAAACCATCTGACATCACTGATGACGAGTACAATGAATTCTACAAGGCACTGACCAAGGATGCTCAAGAACCATTGGCCAAGGTTCACTT…	2195			2934
CG5873-PA	GL275162.1	4	2187974 to 2189120	AACCCACGTGTGCCATGTAAGAGCGGAATCCTTCCAAGCATCGACTTCAGCAAATGGGCTGAATTCCCACAGCAGGCTTACGCTCAAGACTACGCGAATGACTATTCGGGACAGTATGGTCAATTTGTGAAATGAGCTTGAGTCATTCTAATAATCAACGATATAAAGACAATTCTAGCGAGTGTTTCCGCGAAAATTAAGGAAACGATAAAACAATAGTCAAATTTGATTTTTTTATGAATTTCAGTAATCTTTGACACTTAGATAAGAGTTGATCCATCGTCGGGACATTTTCTTCCATAAAACAATAACCGTACCGACAAGCATTTATTTCGCAGCATGTGTACTTGTGCATATAGTACATAAGACTAGTTGAATATATTTAAACGATCGAGCACG…	1147	0	97.7	3296
CG7002-PA	GL276749.1	7	2838036 to 2837337	GGTTGTCACTGGCACGTGGACCCTGAACCGTTCTACAAGGACTGTCTGTACGACATGTGCGCCTGCGAAGCAAATGTCGAGAGTTGTCTTTGTCCGACTCTCGCCGGATATGCCAAGGACTGCGCGCAAATCGGAGTGATCATACCCTGGCGCCAGCAGGTACAGGAGTGTCAGCTTCACTGTCCCGGAGATCAAGAGTACCAGATGTGCGGTAGCAGTTGCACGAGATCTTGCGCTGACATTTCTTTCCACAACGAGTGCAAAGAGGAATGTATAGAGGGCTGCAACTGTCCTAAAGGTTTCACCCTCGACGTCAACGGCGACTGCATCCCCATCGGTCAGTGTCCCTGTAGCTACGGTGGACTGGAGTTCTTAGCAGGTTACAGAGAAGTCAGACCT…	801	0	99.3	11488
CG7586-PA	GL277768.1	1	8274881 to 8275887	AGATTCTAGAGATTACAAATTTGTTCACGTGGAGGATAACGGTATAGTTGAGTCCTACAATCCGCGTACTTCATTCGGTGAACATCAGTTCTTCTTATGGATACCGGCTCAAGATGCCTCAATTGTTTACATTCCAATCGTACCAGTGCGGTTGGGTGATATAAAAGTACACATCTCTGCGACAACGCTTATTGGTAAAGACTCAGCTACGAGAACGCTGCACGTTGAAGCCGACGGTCTGCCGCAGTACAGACATCAGTCGATACTTTTGGATTTGAGTAACCGCGCCTACGTCTTCCAGTACATGCATGTGAATATCACTGAAACTCCTATCATCCCGTACGAAGAGGATCGATATTACATATTTGGATCCAACAAAGCCACCATTAGTGTCGTCGG…	1007	0	99	4914
CG7788-PA	GL275162.1	4	4829286 to 4829838	AGTCGCAAAAATGGATCACTCCCAGCACGACTGCCTGGTGGTTGTGGTACTGAGCCACGGCGATTTGGGCGAGCTTTACGCTCACGACCGAAAGTACAACGCCGAGAGCATCTGGTCGAGCTTTACTTCGAGCCACTGTCCGAGTCTCGAGGGCAAGCCCAGATTGTTTTTCATACAGGCCCGTCGCGGCGACCAAACCGATGAGGGCTTCAAGCTACAATACTGCAGATCCGAACCCGATGGCCACCCCAACCTGGTATTCCGTATACCGACGCATCGTACCGACTTTCTAATCGCCTACTCCACGATTCCGGGATTCTACTCTTGGAGAAATAAAAAGCAAGGCTCGTGGTTCGCACAAGCTTTGTGCTCGGAACTCGACGTCTACGGGGACAGCAG…	553	0	96.6	1371
CG8542-PA	GL274747.1	230	187721 to 187262	CAAGGTATTGATGTAGCCAAGGATGCAATGGCTATGCAGCGTTTGAAGGAAGCTGCTGAGAAGGCAAAGATCGAATTGTCCAGCTCTCAGCAGACTGATATCAACCTTCCTTACCTCACAATGGACGCTAGTGGTCCCAAACATCTTAACCTTAAGCTCTCTAGAAGCAAATTCGAGGCCCTCGTCGCTGATCTCATCAAGCGTACGATTCAGCCTTGCCAGAAAGCTCTTACTGACGCCGAGGTATCGAAGTCCGATATCGGGGAAGTTTTGCTCGTCGGTGGAATGACCCGTGTACCCAAGGTACAGCAAACTGTACAGGAAATCTTTGGTCGCCAACCATCGAGAGCTGTGAATCCCGATGAAGCTGTTGCTGTTGGCGCTGCTGTCCAAGGTGGA…	460	0	98.7	2112
CG9095-PA	GL274073.1	12	2686654 to 2687312	TGACGGCCTACCAGGCACGATAGTCGTCCGCGTCGGCAACAACCGTCCGGACCTGGGTACCAACCCGATCTGCAACAGGTTCACGGGTCCGCTGGAAGAAGGCCAGCCCCTCTTCCTGCCTTGCAACCCACCGATGCCCGGTGCCTTCGTCTCGGTTCACCTCGAGGCTTCCGGACCGAGCCCGACGCCTGTGCAGCTCTCCCTGTGCGAGGCGTTCGTCTATACCGATCAGGCGCTGCCGATCGAGCGCTGCCCCCAGTTCCGCGACCAGCCACCGGGCTCGACCGCGACCTACAACGGCAAGTGCTACATCTTCTACAACAGGCAGCCCAAGAACTTCCGGGAAGCTCTGGCCTTCTGCAGAGCTCGCGGAGGTAGTCTGGTCGACGAGAGCAACCC…	659	0	99.4	2712
CG9134-PA	GL273943.1	51	1097868 to 1097626	AGGCCAACTGGTACAGAGCGGCGCAGTACTGTCGCTACCACGGTATGCACCTGGCGAGTATCAGCTCTCAGGAGGACAACGACAAGCTGGAGAAGCACATCAAAGACTTCGGTCTTGGCCACGAGCATTTCTGGACGTCGGGCACCGACCAGGGTGAGGAGGGAATCTTCTTCTGGATGGCCAACGGTAGACCCGTAACCTTTGAGAACTGGAACACCGGCGAGCCCAACAATTTCCGGTACG	243	6.23e-127	99.2	549
Chitinase 5	GL275601.1	30	667324 to 668032	GAGAACATGAAGAATTACATAGTTCCTAAG-CCAGAGTACAACACCACGCCAAGACCCGAATGGTCGAGACCGAAGAGCACGACAGCGAACCCCGCCGAGGGTTCGTACACGACGCCATCCCGCGAGACCGAGGAGACCACCCCCAGACCAACTAGGCCCAACCGACCGACTGCCCCGACTCAGCAGACCAAGCCCAAGCCGAAACCAACTGTTCCACCTCAGCCGCCCACCGAAATCGACGAGAGCGACAACGAGATCAAGTGCGGAGAGCAGGACTTTATGGCTGGAAAGGATTGCACTTCCTACTACAGGTGCGTCTA--------------------------------------TGGCAAACCT------------------------------…	1488	0	94.5	2231
Chitinase 7	GL274950.1	14	146686 TO 146999	CAGMKAYCKKSWSYTRMTAMACSWRMTGGYCKMMGGATTCCAYGGCAANNGGGAG--------------------------------------------------------------------------------------------GGTSAAACTGGRCGMSCYCAAGGAGAAGCTCTGCATCGG---CATGCNNGCCTWCGGCTGATC-----------------------CKTCACTCYCGAYGAYMTGRCGAACTTCGASTTCNACGNGNNNGCNN-CGNCGGCNNN----N-N-------NNNNAAGGAGYCGGGCTTCNN---------NN-TACGAGRTATBCATT------GTVCTGAABAAGGCCAABACGWCGCTNNNNNNNNNNNNNN…	477	4.61e-162	98.4	3015
Chitinase and chia	GL276749.1	7	1897246 TO 1897670	GCATGTTGACTTTATAAATCTGATGTCTTATGATTACCATTTTTATATTTGGTATTATCCAGTCACGGATTTGAATTCTCCTTTGTATCCGCGATCTTTGGAAACGGGATATTTAACATCCTTGAACGTGAATTTCTCAGCAAACTATTGGGTTTTGAAAGGCATGCCCCGAGAAAAAATAGTTATAGGCATTCCATTGTATGGCCATTCCTACAAATTGTACAATCCCTCAAACCACAAATTGCAAGCACCTGCTCGCGGTTACGGGGATACGGGACATATGGGTTTTGTAACTTATCCTGAAGTATGCAAATTTTTGAAGAATGGCGCGGTGCGAGTTTTTGTTAATGACAGTCATGTACCATACACATACAAGAATAATGAATGGATATCATACGA…	425	0	99.3	1356
Chitinase and Chia	GL274210.1	22	1221047 TO 1219572	GGAAGATACCACTGAAATCAGTCAAACAGAAACTACACCTTTTATAATTGAGGTAACGGAACCTATCACAAGCGAAACTTTTACTTCTACGTATCCAGTAGAAGAAGAAACATTCAGTTCGTTGGAATCATCATTGCAAACAACAGTTCCTTCATTTTTATGGAATAGTTATAGAACCAATATGGATAATTTGAATGACGAAGAAATTCAAAGTACAATTTTCGATACGACTACAGAAAGTTTTAATGCTAAGCTTTCTACTATTCCATCGAGCAGCACAGCAACTCTTTCATCAACTGACCAAATAACAAAAAAAATTCTTCTAAGAAAACGACCATCGACGACGCCTACGTCGGTCGATAGACAACCTCATGATGATGTTAATTCGCGAAGACGTAA…	1476			5745
Chymotrypsin 2	GL277768.1	1	6506319 TO 6506573	GACGTTCTGGAAATGCGGTGACAGTAGTGGCTGGTACCCAGTTGCTCCACGGTGGTTCAGAGCAGGTCTTCAAGTCCGAGTACATCGCGTGGCACGAGAAATACAACAGTGGTCTCTTCATCAACGACGTCGGCCTGATCCGTGTTGACAGGGACATTGAATTCAACGAGAAGGTTCAGCCGATATCTCTGCCTAACGAAGACTTCTCTAAGGTCGACTACCCTGTCGTTCTCACTGGCTGGGGCAGAACTCAGG	255	9.68e-101	91.8	759
Coagulation factor-like protein 1	GL277752.1	21	1583715 TO 1583368	CGCACCTGTGAATGGAACTTCTTCGGCGAGTTTCAGTATAGCGACGTCGTTTTCCGAAGTTTCCGGATTGTAATTAGGGTGAACGATCTTCTTCTTGATAACGTAATCAACGGGGTGTGCGCCGTCATCTTTGCTGTGCAAGTTGTGCTCTCCCAACCGAACGACCCTGAGATCGTTCTGTCCTTGGACGCAGTGGGCTGCGGTGATGACAGTTCGAGAAGATATCAAAGTCCCTCCGCATTTGAAGCCAACGCGATTGCTCGATTTCTGACCGTAGCCTAAGATTCCTAGCCAAGGCCAAGCCCCTACACAACATTTAATTATCAGTGAGTTCTTCGTTTTTATTCGAAAAATGAGCTATGAAAATTCACCAAGTTCGGACGGATTTCCACCGACTAC…	720	9.76e-177	97.7	1890
Coagulation factor-like protein 3	GL275014.1	24	638574 TO 638876	GAGTTGCCGAAGGACGAGAACACGCCTCTGTTGCCGCCTCACTGTGGTCACAGCGCTGCTCTTCACAACAGAATTGTCGGCGGAAATGATGCTGCGCTGAATGCCTGGCCGTGGATGGCTGCAATAGCTTTTCGCTTCGGCAACGATTCCGAGGAGTTCATATTCAGCTGCGGTGGGACCCTCGTATCCTCGAGGCACGTACTGACGGCTGCCCATTGCTTGGAGTACCAGGAGGTCAGCTACCAGGTACGTCTGGGCGCGCACGACCTCGAGAATACCGACGACGGATCCCAGCCCATTGACGTCATCGTCGAGAGCTACGTTGTCCACCCGGAGTACAACAATACCTCGAAGGAGAACGACATTGCTATCTTGAGACTGGACCGAGACGTTGACTTC…	510	8.56e-139	95	1056
Conserved hypothetical protein (LOC100117347)	GL276173.1	6	1759191 to 1759340	CAGAGGCTGATTTGCAAGGTAAAACTCCTGAAGAGCAACAGATGATGAGGATTATGGGATTCTGTGGTTTTGATACTACAAAAGGAAAGAAAGTTGAAGGAAATGACGCAGGAGCTGTTCATGTAATTTTAAAACGAAAGTATAGACAGTACATGAACAGAAAAGGTGGATTTAACAGACCCCTTGACTTTGTAGCTTAA	200	1.1e-102	99	471
Conserved Hypothetical protein (LOC100120951)	GL274505.1	23	2072289 to 2072539	GATTCTTCATGACGGGCTACCTACCCGTGGGCTTCGAGTTCGCAGCTGAGCTGACGTATCCGGAGCCGGAGGGTACAGCAGCCGGACTCCTCAACGCCATGGTCCAGGTGTTCGGAATCGCGTTCACCACCTTCTACGGCTACCTGATCGGCGCCTGGGGCGACTACTGGGCGAACATCGCTCTCTGTGCCATCCTGTTCGTCGGTGCTCTTCTCACCTACATCATACCCAACGATCTCAGAAGACAGAAC	251	1.15e-127	98.4	1425
Conserved Hypothetical protein (LOC100122242)	GL276859.1	18	1963978 to 1963693	ATATTTGTTGGACAAAGATCAATTTGTATTTCAACGATTACTCCCCTTTGTTGAGTATGAAGAGAGTAATGTAAGGCGTGGTGGAATTGTTGGAACAATAAGGAATTGTTGTTTTGATGTTGAAAATCATGAATGGCTTATGAGTCCAGATGTTGACATTGTGACTTACTTATTGTTACCTCTTGCTGGACCAGAAGAATTTACAGATGAGGAAAATAATAAGTTACCTATAGATTTACAATATTTGCCAGAAACTAAAAAGAGGGAGCGAGATCCTGACATCAGG	286	3.21e-153	99.7	1164
Conserved hypothetical protein LOC100123754	GL277768.1	1	4153169 to 4153651	AGACTTTTGAAAATAACTTAGAAAACGAAGGCCTGAACCTAGAATACGAGTGCGACGAGCCAAATGGCCTTTGCTTCATAAAAATCTCAACACCTCGTGAAGTTCTGCGTCGTTACTCCGAAATCCTAAAGTTGCGAATGCCGATGAAGGAAATCAAAGGCCTGAAAATCCCGCCAGTCCGACAGAACCACCTACTGCAGGAAGTCAATTCCTTCTTCCGTCAGATCATGAGCCGGTACTACGTGAACTCCGCGATATTCCCACCGATGAGGCACAAATTCACTGCCGTCTACAGCCGTGACAAGGAGTACCTCTTCGATACCAACTCCCCGGATTTTTTTACTCCAGCGACTCGTTCGAGGATAGTCCAATTCATCCTCGATCGAACCAGGTTCACGA…	483	0	98.8	3015
Conventional protein kinase C	GL276289.1	17	993988 to 993760	CGACTTGAAGCCGGACGACAAGGACAGGCGACTCCTGCTGGAGGTCTGGGATTGGGATCGCACGTCTCGCAACGACTTCATGGGCTCCCTGTCCTTCGGCATCTCCGAATTGATGAAAGCACCTGCCAAGGGCTGGTTCAAGCTCCTCACCCAGGAGGAGGGCGAGTTCTACAACGTACCAGTACCCGAGGAAGGTGTCGACCTCGCAGAGCTCAAATCGAAAATGCGG	229	1.63e-116	98.7	2016
Corin isoform1	GL277538.1	9	3380319 to 3377292	CAGAGCCTAAAAGCGAACCAGAACCAACTGCTGAGTCCGCAAGTGAGCCAGAGCCAACTGCAGAACCAACGAGCAAACCCGAGTCCGAGATGGAGCCAAGTAGCGAGCCCGGCTTAGCTGAAGAACACAAAAACGTATTGAAGCCTACGAACGATTTCGAATCAATAGTAGAACGTAAAAGTGAAGCAGAGTCAGAATCTGAGCCAAAGAGTGAGCCTGAACCAGCTGCAGAGCCCACATCAGAGCCGAGTCCTTCTGCAGATTCCAAAAGCGAGGTTGAACCAGCTGATCAACCAATGAGTGACTCCCAACCTTCTGCCGAGCCAAAAAGCGAATCGAACCCAATCAGTGAGCCGGAATCGAATATAGAACCAGTCGCTGAACCAAAACAAGAACCCG…	3046	0	97.4	6957
CTL 2	GL274950.1	14	2396034 to 2401192	GTTTAGTAAAAACTATATGCAGCTATATGACTTATAAAAAGAGTCGAGATAAATTACCGAAGCCCGCGAACTTCGGCAGTGCAATATTTTTTTAATGCACACACCGCTCTCTGCAGCCGCGGCGCGCGCGTAAAAGGGTTAAAAAGCACACGAACGAGGCGGGAGAGGAGGGGATGATGGAGTGTATCATCGAGATCGTATCGACTGCCGCGTAACGTGATTCATATACATCGAGCTGGCGCGGGCGAAAAAATGCCGATGACCAACACATGACACTTTTATAAATGGCCGGCTGCCTATGACGAACTCGAATTNNNNNNNNNTTTTTTTCTCTTGGCCACTACAGCCGAACTCTACGCGTTGGTTAATTAGTCGTGAATAGTGTATTTGCCTACCCGT…	5201	0	95.3	17728
Cu| Zn superoxide dismutase	GL276749.1	7	479687 to 479146	GAAAGCGATGGTGGAACTGAAAGCCCTCGACGGAAATGGCAATCCCGTAGACGGTCCCCGGGGCACTCTAACCCTGGAACAGCTCCCCAACGGCGTTCGAATTTACGGAACGATTTCTGGATTAACCAAAGGCCTTCACGGCTTCCACGTCCACGAGAAGGGAGACCTGACGAAGGGCTGCTCCTCCGCCGGTCCTCATTTCAACCCTTACTTGGTTAATCACGGAGCACCGAATGACCCGCTGCGCCACGTGGGTGACCTGGGCAACATCGAGGCCGGCGAGGACGGTATCGCCCAGATCGACGGCGTCGACCACTACCTCACGCTAACGGGCGTGCGCGGAGCGATCGGCAGGACAGTCGTCGTGCACGAGAAACAAGACGACCTCGGCCGCGGCGG…	755	0	98.2	755
Cu| Zn superoxide dismutase	GL276749.1	7	489457 to 489894	ATTATTACGGAGCTCCAGACTCGCTGACTCGCTTTCACTTTCCGTGCAGTTGACACATTACGCACCCGTCTCGTTTCAGCTCGTCTCTCAGTTCCAGACTCGCCAAAATGTGCAAAGCGGCTCTATTGATTTTAGCACTTGTTGCCAGCGCCTATGCTGAGGAATTAGTTGCATCAGTGCTATTAATGCCGGACCCAGTGTTCAAAGAGAAGAACGTAATTGGTACACTGAAAATCGTTCAGAGCGTAGCCAACGGACCGGTGACGATCACCGGAAGCGTCAGCGGTCTCAACAAGGATGGTGTCCACGGTTTCCACGTTCACGCGAAAGGTGACTTGACTCAAGGCTGCAAGTCCGCCGGACCGCATTTCAACCCTGAAAAGGTGAAGCACGGCGCAC…	818	0	98.9	835
Cu| Zn superoxide dismutase	GL275793.1	16	3365280 to 2264934	CCCCCCAGTCCATATTTATTCATATACAAGCCTCAAATCAGCCAGTTTCCACACGGCACCCAACCGACTACCGACATCGTGATTCAGCACAAGAAGCCTTAACTTTCCGTTTGATTAGTCGTCGCCTATATCACGCACGCAGTCGCAATCTAGCCGCCGAGCAGTTGCATCTTCTTCCTCCCGGCATCTTTGATACGCAAATTCAGAAAAAATGACCAAGGCCGTCTGCGTTCTTCAGGGCGACTGCAAGGGAACCCTGTTCTTCGAGCAAGACGGCGATGCGGTCAAGGTCACCGGCCAAGTGTCCGGCTTGAAACAGGGACTGCACGGATTCCACATTCACGAGTTTGGCGACAACACCAATGGTTGCACCAGTGCCGGACCTCACTTCAATCCCCT…	899	0	98.6	904
Cuticular protein RR-2 family member 10 (CPR10)	GL274950.1	14	1523302 to 1522606	CCGACTCTTCTTCTTCGCACCACCTCCGCCTCGTTGACACCCAAGCAAGACGAAAATGGCCGCCAAGATCATCCTCGCCCTCGCCGCAACGCTCGCCCTGGCCCAAGCCGGCATCGTCCCCGCGGGCGCACCTCTGGCCCTGGCACCTGCTCCAGTCCATCTGGCGAAGCTCGACGAATACGACCCCCATCCTCAGTACTCGTACGCCTACGACGTCCAGGACTCGCTGACGGGTGACTCGAAGGCCCAGTACGAGACTCGCAACGGAGACGTCGTCAGCGGCAGCTACTCGCTCATCGAGGCCGACGGCACCCGCCGCGTCGTCGAGTACACCGCCGACCCCATCAACGGATTCAACGCCGTCGTCCACAGGGAGCCGGCCGTCCTCAAGGCAGCCGT…	762	0	97	750
Cystein rich/ KU Venom protein	GL276859.1	18	922103 to 926334	ATGCTGCGTCTATTAATCGCCGCGTGGTTCGTCGCCACGGCTCAGGCGGGATGTCCGCTGAGCCCGACGTCCGATCAAACTTCCGCCAAGCGACTTCCCGGAGACGGCGGCTATCGGATACTCATCAGCGGGGACTACGATAAGTACATCCCGAACGCGGTCTACACCATCAGTCTTCAAGGTATCAATTATATCGGCGAATCAAATGGCTTTCACTAATATAGACGAGCTGTTAAATCTGGCTTATATAATTTTCAGGGCCGCACAATTACGAGTCGAGGTCCCAGGAATTCACGCGGTTCACGCTATCGGTGGATTCGCAGCACGCCCCGTTCAATCCGGCGGCTCGCGTTGGTTTCTTCCAGATCTTTCCGGACTCCTTGACGGAGTTCAACGAGG…	4238			4235
Cysteine dioxygenase	GL273815.1	10	1657117 to 1657885	GTCCAAGTCTAGCCATGACAAAAAAGAATCCTCGCTTAGGAAAAAGGATGAGAAGATTGTGAAAAATCAGGCGGAGCTTAAGTTTACCAATTCGAAAACTAAGAAAAGCAACAGCTCAGAAAAAGTTAAAAGCATCGAGAAAGTGATGAAGGAAGAAAAAAGTAGCGATTCGAAGAAAAGCTTGAAAGAACGTTTGCAGCCGATCGAAAAAAAACCGACTGAAAAAAAATCCAAAAAGGATTTGAAAAACGTTCAGAACTCCGAAAAGAAGACTAAACTGTCGATTAAAGAGAAGACAAATGAAGAAAAAGCCAGTACTGCGAAAAAGCCTCAAGAAGTCAAATTACAATCAAAAGAAAAAAAGAAAATTAAAGAGGAGAAGAAAAGCACGAAAACGAA…	769	0	95.8	2595
Cytochrome P450	GL276173.1	6	3789423 to 3787707	AGACAATAGTTTATCAGGGCATTCATTTAAAATGAAAACCACATATCTGTTATTATTTGCAATAATCGCAATAGGACATTGCCAAGATTCGACATATTTTCTCGAACCAAAATCTGAAGAAACTGACTACGATCTCATTTGCAATGATCACAACATAACAATTAATTTTTCCGGTCTTAATTTAAATTCTATAAAAGAAAATTTTTTATCGAGTCCGATTATAACATGTCTAGACTTGAGCAGTAATCAAATACAAACCGTAGATTATAGCGCATTTGCAAATTTGCCAAATCTTAAATATTTAAATATGAATGGTAATTCATTTAAACTGCAAGATATATTTTCATTTGGTTTTATGAATTTAGAAACACTTACATTAGATAAAAATGATGCTGGTAC…	1717	0	98.2	4242
DBLOX	GL276859.1	18	37174 to 37998	CCCGCACTAACCCGCTACTGCCACGGCGCGCGCAGCTCCAGCACGTGACGATGAACGAGTTCGCGCCCAGCGTGCTCGGGGAGGCCGTCCACGCCGACAGGGAGCTCAGCCCGATGAGCAGCGGCTTCTACACCGGCTACTCGTCGACCAACCGCGGCGGGGCCTTCGACGCCGTGGCCCTGGCCGCGCTGCAGGCCCTGACCTCGCTCAGGCGCGCCGAGAGCTCGGCCCTGGGGGCGCAGCTCGCGCTCCCGGCCAACCGGCTGAGCCTCGAGCTGGCCGGCGACGAGTCCGCGCCGCCCGGCTGGGAGCCGAGCGCCCTGCTCGTCCACGCCGCCCGGGAGCACGGCATGCCCGGCTACGTCGACTACGCGCACTACTGCTCCGGCGGCCAGCTGC…	826	0	97.3	13965
Defensin 2	GL277752.1	21	2293724 to 2293536	GAACTATCCTACGACGGAAACCTCGATCTCGAGCAGCCCTCTATCAGAGCTCGTCGTTTCACCTGCGACGTCCTGTCCTTCAAGAGTGCTTGGATCTCGCCGAACGACTCGGCCTGCGCGGTCAGGTGCTTAGCCCAGAATCGCAAAGGTGGAACTTGCAAGAACGGAAACTGTGAATGTCACGATTAA	189	3.37e-94	98.4	312
Defensin/royalisin precursor	GL275793.1	16	486691 t0 487155	TTATCCAAAACGCTTGTTCCAAAGATCACCAAAAGTAGTTTTGCGACACTGGCAAACACCTCCGTTGCATCTACCGCCGGCTTTACCCATGCTCAGGCAATTTGCGGCGCATGCGGAGTCTCCAACCTTGCCGCCGAAGCTGAGCAAGTCACAGGTTACTCTGCGCTGTCTAATTCCAGCATTGTCGTCGACCACTGCTTCGTCCCAATCTTGTACGTCAACGAGGTCTTCCAATTCTAAACATAGAAAATGTTTGCTTGTAAATTGTACTATAATTTCTCAGTCGGTAAGATAAAAACATCTAAAAATAAACTGCGAGATTTAAAAAGTCATGCAAGCGAAATTGTAAGATGACTTAAAAATTCAAAATTACAAGAAATAATAAAATTACATACCATC…	465	0	95.5	459
Disulfide oxidoreductase	GL276749.1	7	2663947 to 2663262	GTCTCTGTTGGTGATGGCCAAATCAGAGTCAGGGCAAAGCGCTCAGAACTTTTGGCTAACAAAAGAACAAAGGGCATGTGCAAACTGAAACAAAATTATCCCGAAACTGTTGTTGTAGTCGGTGGAGGACCTGCAGGTGCCACTTGCGTTGAGACTCTCAGGCAAGAGGGTTTACAGGGGCGTATACTGATGGTTTGCAGAGAAGATGTTCTACCTTATGATCGAGTTAAGGTTTCTAAAACCATAGATTTTGATGTACAGAAAGCTTTATTGAGGCCTCAGTCTTTCTACAACGAACACAATATTGAAACTAAATTGGGAAATGCTGCAATTAGCTTGAATGTAAACAGACAGATAGTTACTCTGAGTGATGGTGAAGAGTTGCACTATAACCACTTA…	686	0	98.8	2217
Domeless	GL275793.1	16	434601 to 435204	ACTTACATCCGACGACGACCTTGTTGAGACAGACCGCCTCGTAGTCCTTGTCGTAGCTCTCGTCGAGCCTGAGCTTGCAGTAGTACATGGCGTTCTCGGGGGGCGGCTTGCTCACGTCCAGCCGTATCGTCGTCTCGTTGACGACGCTGATGAACTCGGGCTCGACCTGGCGCTGGCCCTTGAAGAAGACGAGGTCCGACGAGTTCTTGCCCGGGAACGCCGAGTCGACGAACGTCTGGTTGAGGATGCAGAGGATGTGCAGCGGGTTGCCGTGCTCCAGGACGATGTCGCCCGCCGGCCAGGTTCCTGCGGCACAGAGAGAAAGATCACGACATGCATAATTGAAGAATAATTGAAGAGAGCGCAGAGGACGACGGCGCAGTGCGGCGAAAAGTGCGC…	604	0	95.4	7767
Dorsal Protein	GL275162.1	4	1409749 TO 1411167	GAGGCAGTAAACGGAACCGAGGCAGCGGGCAATACTGTCGACGAGACAGGAATGACTGACAGCTTTACCAAGCTGACAAGGAACACCATTCAGGAGCTGTGCTCGCTGAACAACATGTACAAGCCGACGAGAGACGACGTGATTTGAAAAATGCAATGAAGACAAAAAGATAATTAACAAACGTTCCAAGTACAATTGAAATAGCTTTAAGATCAAGAATCGCGAAGAGAAAGAGTTTGGAAAATATTCCTCGTTCCCGGCTATGTGTGTAAACAAAATTATCGTGTGCTCAGAACTGTGTGATGCCAATTGTACTGCTGAAATGAGATTTCGGTTATGGATCGAAAGCCCTGTGATGAAAGGAAATTGATGACAGTCGCGTTTGTGAATTCGCCAAGA…	1419	0	97.4	3005
Dorsal protein	GL276749.1	7	1190882 TO 1190635	GATACACAACTATCGTGGACCAGTAACCGTAATTATTTCCTGCGTTACTGTAGATCCTCCTTACAAACCACATCCTTGTAAACTTTTTAACGGGAACACTATGGACAAGCACGGAGTTTGTCACATCTATGTGCATCGAACAAAGAAAAAAATCCATTTTAAGAACCTGTTCGTTGAATCCGTTAATGAAGAAGACGTAGTCGAATCCTTAACGGAAAGGGAGCGCAAGAAAGTTGATCCGTTTAAGA	248	7.21e-126	98.4	1632
Dredd	GL274073.1	12	1998529 to 2000375	ATGTCATTAATAATAGATGCTATTTCAACAATACCAGAATCATTAAATAATGTTGTACGTTTCTCCAGAGAAAGATTCAACCCAAATGTTTTACAGGAAATAGTACAAGATGCTGACAATTTAGATGAGATGGATATAGTGTCTATCATATTTTTATTTACTGACCAAGAAACAGAGATTCCTCAACTTATTGAATTTTTACTAAACGATCCAGCTACTTATTTTAATACATTAAGGCATCGAGTAAACTGGGAAGAAAAATTGTTAGAATCCTTAATTATTATTGGTAACATCAAAGTAATCAAAAAGTTAGGCTTTGATAACAATGAAATTGAAGCTATGAAAGTGAGATTTGTATACAATGTGCATAATGTAAGTGAAAATTTAAATAAAGTTATT…	1849	0	98.1	1849
Dscam	GL274082.1	102	59598 to 59160	AGATGGTACAAGTTCATCGAAGGAACATCTCGTCGCCAACCGGTCCCACTGAACGAGCGTGTGCGCCAGGTTAGTGGCACCTTGATCATTCTGGAAGCTCAGGTCGAAGATTCTGGCAAGTACCTGTGCGTCGTCAATAACTCGGTGGGTGGTGAGAGCGTCGAGACAGTCCTCACCGTCACCGCACCTTTATCCGCCGAGATCGAGCCCCGAAGCCAAACCATCGACTTCGGTAGACCTGCTACGTTCACCTGCAATATCAAGGGCAATCCAATCAAGACCATCTCCTGGTTGAAGGATGGCAAGCCTCTGGGACATGAAGAGACCACGCTGAGAATCGAAAGCGTAAAGAAGGATGATAAAGGAATGTACCAATGCTTCATAAGAAATGATCAGGAA…	439	0	98.9	5892
Dynamin associated protein	GL277768.1	1	6574936 TO 6575440	AGGAATTGCGGAAGTTCCCGAAAACGTATCGGACGCTGGTTCGGCGGTAGGCGAGGGTCCGTATGTTGAACCAATTACACCAAAATTGGGAGAAGGCCAATTATGTAACATTACGGCAACAACTTTGTACCAATACCGACCGACTCTCGAACAACATCTTTCTTTCGGTAAAGGCGAGACTGTGACAATTAAAGAACAACAGGACGTCTGGTGTTATGGCGAATCAAGTACTGGCATTGTAGGCTGGTTCCCGAAATCCTATGTTAAAATGGATGTAGCGAATGGTCAAGCTGCCACGACGGCTCCTACTGGAGATGGTCTCAATGAATATTACATTTCGTTGTACCAATACGCATCCAACGAGACAGGTGATCTCAACTTTAATCAAGGCGAAGTCAT…	505	0	98.6	3210
Ecdysone-inducible caspase| putative	GL274210.1	22	1242037 TO 1242308	AGATGACTACCATACAAAATTGTATACAGAGTACGAGCCACTAGTAATCAAGGTTAAAAAAGCTGAAGTTTTTAGAGATGAGCCCCAAAGCAGAGGTATAGAAAGGTACGCCATGAGGAGTAATCCAAGAGGCCTAGTCTTAATGATAACAAACATCGATTACAAAATACTCGATAGGAGACCAAGTGCCAAATACGATGAAGACAATTTGACAAATCTTTTTGAAGAAATGGGATTCAGAGTCATAAAATACAAAAATTTGACTGGAAACG	272	1.37e-141	98.9	1317
ECSIT	GL275793.1	16	3101051 TO 3102071	ATGAAATTAAGCTTGAAGTATGTACAAAGTAGCAGACAGTATGGTAAAACACCTAGCTTGCTACTTGCGAATCAACAGAGTCCAAAAGAAAAATTAACAGAAATAAATAATGAAATTAATAAGGAACCTAACGCAGACAAAAACAATGAAACTCAAAAAGAYTCMCWTCNNNNNNNNNNNNNNNNNNNNNNNNNNNNNNNNNNNNNNNNNNNNNNNNNNKAWCGYRGATNNNNNNNNNNNNNNNNNNNNNNNNNNNNNNNNNNNNNNTCKKTSTYTGCAAAAGNNNNNNNNNNNNNNNNNNNNGAWAATSCNNNNNNNNNNNNNNNNNNNNCGTTYTNNNNNNNNNNNNNNNNNNNNNNNNNNNARCCRRGANNNNNNNNNNNNNNNNTCCCYKTCRTC…	1023	0	97.5	1455
Emp| epithelial membraen protein	GL277318.1	279	34220 to 34719	AGGAGCTGTCGGTCGGTTCTGAGGAAGACCTCGTGGTAGTCCCGAACGTGCCCATGCTCTCGGCGACGAGTCAGTCCAAGCACGCGGCTCGCTTCCTGCGACTGGCCATGGCCTCGATCATGGACATCCTGAAGATCAAGCCTTTCGTTGAGGTGTCCGTGGGCCAGCTACTCTGGGGCTACGAAGACCCGCTGCTGAAGCTCGCCAAGGACGTCGTTCCTACCGATCAGAAGCTGCCCTACGAACAGTTCGGTCTGATGTACGGTAAGAACGGCACCGCCAAGGACAACTACACCATCTTCACCGGAGCCTCCGACATCACCAAGTACGGACTGCTCGACAAGTGGAACGGCAAAGCCGGTCTTGGACACTGGACGACGCCGCACTGCGACAGCGTCA…	500	0	99	1490
EMP|Epithelial membrane protein	GL274664.1	33	1320168 to 1319697	GAAACTCGGCGTCCCAGTCGAAGGCAAAGTCCGCGTCCAGCTGAACTTGAAGGTCGAGCACCAGCCGGACATAAGTGCGGTGGCGAACTTCACGGACATTGTGTTTCCGATAATGTGGCTCGAGGAGGGCGTCGACGAGCTGACACCCTCGATCAGGCGCTGGGTCTACCTGGCGACGACGTTCGCCGATATCGCAGTGCCCCTGATCACCTACGGTCTCATTCTAGTCGGAATTGCCTGCCTCGTTTTGGCCAGCTACAAGGCCTACAGCAACGTCGTGCTAACGCACGAGGCTATCGAGCTCGGCAAACGCACGATACGTCGTGGCTCATCGTTCATCGTCAATGGCCAACATAGGCTGCTCATGACCAAGGACTCGTATGTGCTACTCCAGACCGA…	472	0	97.9	1767
Emp|Epithelial membrane protein	GL277723.1	251	60671 to 61381	ATGACGAGCTGCGCGGAGAAGAAGCAGCCGGTGAAGGAGTTGAGAGACGAGAGCACCTTGTCGGACATGACGGCTCCGATGCCGAGCTGCCGTCGACTGTTCGCACGCAACTGGGCCGTCTGGCTGCTGAGTTCACTGGCGGTCTTCAGTCTGGGTCTGCTCAGCCTGACCTGGCTGACGGACTTCTTTAACGACGCGATCGTTTCGAACCTGCAGCTGAGCAATGGTAGCCTCAGCTTCGCTTGGTGGCAGCGTCCCTCGGTGCGAGCCGTCTACCGCATCCGCATCTTTAACTACACCAACGTCGATGAGTTCATGAACGGCGAGGCGGAGAAACTGCGCGTCCAGGAGCTCGGCCCCTACATCTATCGCGAGACGCTGACTCGCGTCAACTCCGAG…	711	0	98.2	1626
ENSANGP00000000956 (LOC100119576)	GL276859.1	18	210895 to 211096	AGGAACGAGCGGACGAGTCGGGCGGCCAAGGCATGGGCGCGATGACGAGGTGCATCGAGCTGATGGCCGTCGTCGGCTCCTTCCTGCTGATCCTCCTCACGATGCCGTTCTCGCTCTGCGTCATTTTCAAGGTCGTGCAGGAGTACGAGCGGGCCGTGGTCTTCCGGATGGGCCGGCTGAAGGCCGGGCCGCAGGGACCGGG	202	3.01e-101	98.5	891
ENSANGP00000000956 (LOC100119576)	GL276859.1	18	210895 to 211096	AGGAACGAGCGGACGAGTCGGGCGGCCAAGGCATGGGCGCGATGACGAGGTGCATCGAGCTGATGGCCGTCGTCGGCTCCTTCCTGCTGATCCTCCTCACGATGCCGTTCTCGCTCTGCGTCATTTTCAAGGTCGTGCAGGAGTACGAGCGGGCCGTGGTCTTCCGGATGGGCCGGCTGAAGGCCGGGCCGCAGGGACCGGG	202	3.01e-101	98.5	891
ENSANGP00000004677	GL276796.1	28	310371 to 300763	CTCTGGCAATTCCTTCTTGGATGAGGGATTCTTGCTTGACAAGAAACCAGGCATGCACCAGCCCCAGAAAATTACTGATGCTAAGATTCTTATTGCCAATACTCCTATGGACACTGACAAAATTAAGGTATTTGGCTCTAGAGTTCGTGTGGATTCAATGGCAAAGATTGCTGATTTGGAACTGGCAGAAAAGGAAAAGATGAAGGACAAAGTCGATAAAATCGTCAAACATGGTTGCAACGTATTCATCAACAGACAGCTGATCTACAACTACCCAGAACAGTTGTTCGCCGATGCCGGAGTCATGGCCATCGAGCACGCAGATTTCGATGGAATCGAGCGACTTGCCCTAGTGACTGGTGGAGAGATCGTAAGCACGTTCGACGCGCCAGATATGGT…	1342			1985
ENSANGP00000005322	GL277768.1	1	7768809 to 7768562	AGAAATAAGGTGTCCAGAGCCTGTGCTGGCTAAGCACGCCATTCTCTCACTGACTGGAAACGATCGCATGTACGGCCGAACGCTCATAAGGACGGGAACCGCGGACAACACTAACTCTGGCGCGACCTCCTACAAAATCGGCGCCCTCGCCAAATATCGATGCGAGCGCGGTTACAAGGTCGTCGGTAATCCACTGTCCAGCTGCGAGGAGAACGGAACTTGGAGCGGCAGCGTACCTCAGTGCGTGT	248	5.07e-129	99.2	3384
ENSANGP00000006233	GL277133.1	19	2838874 to 2837889	AGGATAACCACGAGAGTCACACGAACGATGACGACGTCAGTGCCTGGAGCGACTGAGGACAGCGAGGAGATGCGCGAGTCGATGCAGAAGATCGTCGACCAATTCATGACGGAGGAGCGAAAGGGACAGTGAACAATCCACTACTCCGATGAAATTCGATGAGTCGAAGATGCGAGAAACACTTTATACATAGACTATATAAATATATAAATATATATAAAGTATAGGCGTAAAATAAAAAATAAACGGGCGCGAACTTTTTGAAACGAATATCGCGAGCCTCTTGTGTTCTCTATATTATACATAATGACGATGAGAAAAAAAGCACTTCCGCGCCGACCGCGCAGCTGAGCCACAGGTACGTCATCGTCAATAACGATGAGCGCTTCTGGCCTATAT…	986	0	98.3	6213
ENSANGP00000006721	GL277752.1	21	169528 to 168761	GGCACTTGTCTAGGTGACCCGATCCCCGCTGGTCGCTGTCGACCAGTTCTGGATTCGTTCTATCCTCAGGGACGTATAGTTGGTGGTCGGGAGACCAGTATCGAAGAACATCCCTGGCAGGTGTCCCTCCAGGTGTCAGGTTTACACTTTTGTGGCGGTAGCATCATATCCGAGGACACAATACTGACAGCTGGCCACTGTACCGTCAGCTATCCAGCCTCAATGATGTCCGTGCGGGTTGGCAGTTCCAAAACATCTAGTGGAGGAGCACTTCATGAAGTTCAGAAAGTTGTTCGCCATGAAAACTATAGAACCGGATTTTATGGTGCCCCAGAAAACGATGTTGCTGTACTGAAGCTCAAATCAAGCATTGCGTTGGGCAAAACAAGCCGACCCATT…	768	0	98.2	813
ENSANGP00000010161	GL277752.1	21	1429916 to 1430935	ATGAGTGACTCAGAGGATGGAGATTTTAAAGTTACAGGACCAGTAGACAATGCCTGGTCTCTGAAAATTCCAGAATTCAAGCCAGATGACAACCCAAATCGTCTCTTGGAAGAAAGTTCTTTTGCCACACTTTTTCCCAAGTACAGAGAAAAGTATTTGAGGGAATGTTGGCCTCTTGTGCAGAAAGCCCTGAGTGAACATCATGTAAAAGCCGAGCTTGACCTAATTGAGGGTAGCATGACAGTGAAAACGACACGAAAAACGTGGGACCCATATATTATTATTAAAGCTCGTGATATGATAAAACTAATGTCACGTTCAGTGCCATTTGAACAGGCAGTTAGAGTGCTTCAGGATGATATTGGTGCTGACATTATCAAGATTTCATCCTTTGTTAGG…	1020	0	99.2	1020
ENSANGP00000010319	GL274726.1	20	258893 to 259191	CGACAACTGAAACGCTATAGTCTCACGGTTTTCCCGTCTGTGTTCACGCGAGAGTTTACAAAATTTCTGTGTCGGTGATATTTCGATGGACATTTTATTGTTCTATTTAGTGAAAAGCTTGAGGGATAGCATCGTGCAGGCCAGCACTAGTTCAGGGGCTTTAGAGTACAAGTTTCGCACAACGAGCGAGATGTGCGATTCGAAGGACGAGAAGAGCTTCGAGGAATCGAGTCGAGGCCAAGTATTTTTCCATGGATTCGAGGATTTCGACGTTGCCGAACTAGTGGAAAATAAGATTTCACCGGATCAAGGATACGCCACTACTCCGGAATTCGTGCAGAGGACGGTGATACCGGAGTGGATGCTGAGGCGGATAGATTCGCACGACGCGACGGTGCC…	882	3e-157	99	1225
ENSANGP00000010886	GL277668.1	141	34098 to 34659	AGGTGTTTGGATGGGTTTCAATAATGTTGAGATTCAAAATTTAAGAAAAGAACAGAATCCTACAGAAGAACTTTTAGCAATATGGGAAAAGCACAATCATACAGTTTTAGAATTATTTATGTTACTAGCCAGAATGCATCATTATCAGGCAATGCTGCCAATAAAGTCATTTGTCGATAGTAAATATCATACACTACTGTACAATGGCGAAGGTAATCTTCAAAAACTCCTGCGCAATGGCGAGCTTAGAAAAGATACTAAGGATCTCAAAATAGGTGCACAAAACTTCAATCAAAACCAAAAACCTCAGGAAAATGCCGCTAAAATACTTGTCAATAATAGCCTTAAGGATGAGTCGTCTAAAATATTGAATCAGCCTATGCCACATCATGATCAACA…	562	0	90	2763
ENSANGP00000010886	GL277668.1	141	34098 to 34661	AGGTGTTTGGATGGGTTTCAATAATGTTGAGATTCAAAATTTAAGAAAAGAACAGAATCCTACAGAAGAACTTTTAGCAATATGGGAAAAGCACAATCATACAGTTTTAGAATTATTTATGTTACTAGCCAGAATGCATCATTATCAGGCAATGCTGCCAATAAAGTCATTTGTCGATAGTAAATATCATACACTACTGTACAATGGCGAAGGTAATCTTCAAAAACTCCTGCGCAATGGCGAGCTTAGAAAAGATACTAAGGATCTCAAAATAGGTGCACAAAACTTCAATCAAAACCAAAAACCTCAGGAAAATGCCGCTAAAATACTTGTCAATAATAGCCTTAAGGATGAGTCGTCTAAAATATTGAATCAGCCTATGCCACATCATGATCAACA…	564	0	97	1443
ENSANGP00000011090	GL274178.1	2	871232 to 871628	GAGCATGTGGGCGTCGGACTCGAGCATAACCCTGGCGATGTCGCGGCTCCAGATGCACCAGAGTCCCCACCGCCACCACCACTACATCACCCAGAAGACCAACAACAACAACAACAACAACAACAACAACAACAACCTCCTGAGCTGTCGACACGGTCACCTGCACAGCCACGTCCACACCCATCCGACCAGTCACCCTCACGGACAGTCCAAAAACGACAACAACAACAACAACGGAAAGTCCGGCAGCCAGAGCCACC------------AGCAGCAGCAGCAGTCGAGGCCGACGTCGCAGATACAACTGCAGCAGTCGATCAAGAGCCTTCCATCCACGCCGCTGGCCACCAAACACATCTCCACCAGTTCTTACGCGGACTACGAGAACTACCT…	409	1.97e-180	94.4	1140
ENSANGP00000012201	GL276459.1	27	514040 to 516565	CTCGCTATAGCATAATACATAGGCTTCCAATAATT--------TTCCAACTCGCTCACCACGCATAATCAGGAAAAAAAGTCGCCCGAGATAAGGCTCTTATTGTTTATCGTATACATATGAAAAG--AAAAAAAGAAACTATCCTGCACTCGAAACTGAAAGCCAGCGCGAATCAGTCACCCGCACATCAAATATTGACGCTCCGGCGTCGAAAAATTTAACAGCTGTAAAAATACAAGCCTCCATCAAGAGCTCGCGCGTACGTGGCTGCTGCCTGGAAGCATCGCTCATTTCGGCCCCGGCGTTTACGGGTGTGCATCATTAGACCTGTTTTTTCGCAGAAAAGACTTAAAAAAGAATCGGCTCGTCCGCGGTAAAGGGGAAAGAGCCCAGGTGAG…	2536	0	96.5	2517
ENSANGP00000012893	GL274622.1	3	20131 to 2253	AACACAATGCCTGCCATTGGTATTGACTTGGGAACCACCTACTCCTGCGTGGGAGTCTGGCAACAAGGAAAGGTCGAGATCATCGCCAACGACCAGGGCAACAGAACGACACCCAGCTATGTTGCCTTCACGGACACGGAGCGTCTCATCGGAGACGCCGCCAAGAACCAAGTGGCGATGAACCCTGCCAACACAGTGTTCGACGCCAAGAGGCTTATCGGACGAAGGTTTGACGACGAGAAGATCCAGAGCGACCTGAAACACTGGCCGTTCAGAGTCGTCAACGAGGGAGGCAAACCGAAGATCGAGGTTGAATTCCGCGGTGAGAGAAAAAGGTTCAATCCGGAGGAGATCAGCTCGATGGTCCTGACAAAGATGAAGGAAACAGCGGAAGCGTAC…	1932			2253
ENSANGP00000012893	GL277224.1	8	440116 TO 438301	AGGTGAGGATCGAAATCGAATCCTTCTTCGAGGGAGAAGACTTCTCCGAGACGCTGACCCGTGCCAAGTTCGAAGAGCTGAACATGGATCTCTTCAGAAGCACCATGAAGCCCGTGCAAAAGGTCCTTGAAGACGCTGACATGAGCAAGAAGGACGTCGACGAGATCGTGCTCGTCGGAGGTTCCACTCGTATTCCCAAAGTTCAGCAACTCGTTAAGGAGTTCTTCGGTGGCAAGGAGCCATCCCGAGGTATCAACCCTGACGAGGCTGTCGCTTACGGTGCCGCCGTTCAGGCCGGAGTCCTCTCTGGTGAACAAGACACTGATGCCATCGTTCTTCTTGACGTCAACCCTCTCACCATGGGTATTGAAACCGTTGGTGGAGTCATGACCAAGCTCA…	2070			2850
ENSANGP00000014133	GL274073.1	12	2696749 to 2696403	ACAACAAAGACAATCGAAATGAAAGCTCCATTACCATAGATATGGTATGTGATGTATTAGTTGATGAGAAGAAAGGAGTTCCTGTAAACAGACTTGCCGAAGTCAGCAATA------------TGCTTCTTGCCAAGAACAAAGAGAAATGCTTGGATTACAAGTATGATAAGATGATTTCCGAATTGAGAAACATTACCTG-------GGCTGAGCAAAAGAATGCTGGAGGTCGCCAATGGACGTATCAAACATGCACAGAGTTTGGTTTCTTCCAGACTTCAAC----GGCACGGCCTAACTTGTTCAGTGAAACTT--TCCCTGTTGAATTCTTCATCCAA---CAATGCGCAGATATCTTTGGTCCAAGGTTTTTGCACACTCTGCAACCCGGC…	926	1.46e-174	97.7	1372
ENSANGP00000014225 (LOC100123993)	GL274178.1	2	6275985 to 6275713	AGGTGCAATTTGGACCAAGTCACCGGTAAACTTCGAATGGTGGGAAATCGATTTAGTATTTAGAATAACAGGTAGAGGAAGAATCGGAGCTGATGGTCTAGCATTTTGGTACACAAGCTCAAAAGGTGCTTACAATGGCACCGTTTTCGGCAGCTCCGACCAATGGAATGGTCTTGGAATCTTCTTCGATTCCTTCGATAACGATAATAAGCATAATAATCCCTACATAATGGCTGTTCTTAATGACGGTACTAAAGTATTCGATCATGCCAA	273	2.72e-147	100	1599
ENSANGP00000014839	GL275292.1	74	229971 to 228615	TTGAAGAGGGCATTGTTCCCGGAGGTGGTACTGCTCTCTTGAGATGTGCTCCATCCCTCAACTCTCTGCATCCAGCAAATGAAGATCAGAAGACTGGTATCAACATCGTAGCTAATGCTCTTCGCATGCCATGCCTGCAAATTGCCCAGAACGCTGGGGTCGATGGCAGTGTCGTTGTCGCCAAGGTCTCTGAAGGCAAACTTGGGTATGACGCTATGAACAACGAGTACGTAGATATGATCGAGAAGGGTATCATCGACCCGACTAAAGTCGTCCGCACAGCTCTCACCGATGCCGCTGGAGTCGCCTCGCTCTTGACGACCGCCGAAGCAGTGGTTACTGAGCTGCCAAAGGAGGACCCACCAATGCCAGGTGGTGGTATGGGTGGAATGGGTGGCA…	1379	0	98.9	2665
ENSANGP00000015293	GL275793.1	16	2693673 to 2694050	GAGAAATGGAGGTCTTTGAACAGAACCACCCTATTCCGTTCTCCAAGATGTTGACCTTCTACCGTTCCAGCCCATTCACATTGACGGCCAACTATAGCTCACTACCTCCAGCATATCCTTCAACTCAAATTGGTACATTTACTATTAAAGATGTAAAGCCTAACAAGGAGGGAGAATCATCGAAAGTTAAAGTCAAGGTCAGGATAAACCTTAATGGAATTTTGACTATCGCGTCCGCCTCTCTCGTGGAGAAGCGTGAGCAGACGCAGCAAGAGAAAGAAGAGGAAGAGCAGCAGCAAGCTCAGGAAGCGAACGCTGAACAGCAGCAGGATAAGAAGGACAAGACGGATCAGGATGCGGAAGCCAAGGAACCTCCAG	378	0	99.5	2469
ENSANGP00000017000	GL275593.1	5	903732 to 903997	GGATTTGAAGCCTAGCAATATTGTCGTCAAGTCAGACTGCACCCTCAAGATATTGGACTTCGGCCTCGCGAGGACGGCTGGTACGACCTTCATGATGACGCCCTACGTCGTGACGAGGTACTACAGGGCGCCCGAGGTCATCCTCGGCATGGGATACAAGGAAAACGTCGACATCTGGTCCGTTGGCTGCATCATGGGTGAGATGATTCGCGGTGGTGTCCTCTTCCCCGGCACTGATCACATCGATCAGTGGAACAAAATTATAG	266	4.03e-138	98.9	1305
ENSANGP00000017051	GL276199.1	566	52924 to 53291	ATGTATCTTTTTAAACAGTTTTTAATAAGTTACTTTTTTTGTCTTCTATTACAATCATTGAAAATTGTAGTCGAAGCTCAAAATATTCAACAGTGCCCAAATCCGACAGAAATATCTCCATGTACTTGCAGTATAAAAAAAAATGGTTTAGATGTAATCTGTGAATTTACTGACTTCAATCATATAAGCAAAGCAATGGATGGTCTTAAAGGACGACAAAATTCAATCATATTTTATTTAAAATTAAGGCACAATAATATGCCAAAATTACAGGGTTTTGTATTCCTAGGCTTAGACATACATCATCTTACGATTCATAATAGCAGTCTTGCCGTTGTTGAAGAAACTTCTTTATCATCTATTGGTAA	368	0	98.9	724
ENSANGP00000017402	GL277768.1	1	2595554 to 2595274	ATGTCGAAGTCGTCGGGGAGCTTGAAGGGCAGCACGAAGGGCAGCATAAAGGGCAGCATCAAGGATGGAGAGACGAATAACGGGCCATACGACAGCCCCGGTGTTGGCGGCGACGAGATCAAGCTCGAGGCAAAGATGTCCCTGATGAACGGGGTCACCGTCATCGTAGGATCGATCATTGGATCGGGGATCTTCGTCAGTCCCTCCGGTGTGCTGCAGTACACCGGCAGCGTTAACGCCAGTCTACTTGTTTGGACGGCCTCTGGCCTCTTCTCGATGGT	281	5.76e-145	98.6	1641
ENSANGP00000017597	GL277538.1	9	4087029 TO 4086654	GGTGAAAAATCAATGAGGCCACCATCGCCGGAGAACTGCACGATCATCGAGGAGAGTCGTTCGACCGTACGAGTAAGCTGCGCCGAGAGTGACTACGTCGACGCGAAAAGTGCCATGTACGTCCTGCAGGTATTCGACGCGGAGACGAGAAGGTTGCTCGCCTCGGCGACGAGTATGACCCCCTCGATGCTCGAGGTGACGGACCTGCCGGCCCAACGCAGCCAATCGGGGCTAGTTTTGTTCCTGAGGGTAATGACGGCTCACGCGACCAGCGACGCTACGATTCTTCACAGTGGACAGCTACTGCGCGATGGCAAGAACCCGGAGCACCAGACCTTTCCAGGTATCTACGTCAAGGCTGCTGCATGGATAAACA	376	0	99.5	3018
ENSANGP00000018316	GL274082.1	102	397279 to 397012	CAGCTGGAGTCGCCGCTCGCGCTGGGCAGTAAAATACAGCCGATCGAGCTGGCCGAGGCCGCGGATTACTACTCGACGGGCAGCAAGGCCTCGGTGACCGGCTGGGGCGTCGAGGAGAGCAGTGGCGAGCTGAGCAATTACCTGCGCGAGGTCTCGGTGCCTCTCATTTCCAACTCCGAGTGCTCCCGGCTTTACGGCCAGCGCCGGATCACCGAGCGCATGCTGTGCGCCGGCTACGTCGGCCGGGGCGGCAAGGACGCCTGTCAGG	268	2.93e-127	96.3	963
ENSANGP00000018359	GL274178.1	2	6732030 to 6732547	CTGTCCCCAGTACGTCTTCCGTTGCGCCTACGGTGCCTGCATAGACAACGACCTCAAGTGCAACGGTGTGGTCAACTGCGCGGACGGTTCCGACGAGGACCGCAACCTGTGCGGCGGCTACGAAGAACCGATCACCAAACGGACGACCAAACCAAACGACGACCCCTACAACACCAACCAGGGCAGACCAACCGATGACCCTTACAACACCAGCCAGCCGAGACCGACATCAAGGCCAACCTTCAGACCAACACAGAGACCAACCCAGAGACCGACGTCCAAGCCTCCACTGGTCAGAGAGTCCTGTGACGTGCCCGACCAACCGGAGAACGGACAGTGGATGTTGGAGAAGAGCCAGTGCCATAGCGGTTCCAACTGTCGAGTTCAATCCGGGGTCAG…	518	0	96.1	2340
ENSANGP00000018364	GL277538.1	9	3463598 to 3463154	CAGAGTCGACGTCTCGCAGCTGCGCTTCGCCCTGGACATTCTTCTGCCCCATCTGTACATCGAGGGCCAGTACGAGATCGACGGACGTGTTCTGCTGCTGCCGATCCGCGGTAACGGCCCGATGACCGGTAACTTCACCGACGCGACCGGTTCGGTCAAGATCCAGGCGGGTTTGTTCAAGGACGACCAGGGCAACGATCACCTCAAGCTCAGCGAGTTCCGCATGCGCATTTCCATCCGCAAGGGATCCCTCAATCTCGACAACCTGTTCGGCGGCGACCCGACCCTCGGCAACGTCGTCAACAACGCCATCAACACCAACTTCGACGCCTTCATCAAGGAGCTCCAGCCTCTCATCGAGAAGGCCCTGTCCAGCGCTTTCACGGACATCGGCAACAG…	445	0	99.3	747
ENSANGP00000018685	GL275014.1	24	947667 to 947254	TGCAGACCAGTGACTTACGAATACGAGAAGACTGTCGTGCACAAGGGTATCACGGGCTACAAGTTCTCGATGGGCAAGAAGACTTTGAGCAACGACACGAGGCGACGTTACCCGCACGAGCAGGCCAAGTACTTCGAGCCGACCACCACCACGGAAGATTTCTTCGTTGTCGACCCGACGACGATCAGACCAGAGGACGAGGACGACGATCCGGACGTGGTGAACGAGGGCCAGTGCTTCTGCAATGGCGAGTGCGCTCCCATGGGTGTCATCAACATCACGGCCTGTCGCTACGGCGCCCCGGGCTTCATCAGTCTACCTCACTTCCACAAGGCAGATCCCATGCTCAGAAATCAATTCACCGGCCTCAATCCCAAAGACGAGGACCACAGCTTCTCG…	414	0	98.8	1713
ENSANGP00000019120	GL275453.1	15	1596804 to 1597266	TTCGCATCCACGACTCCGGTGGTCAGCCTGGCGC-AATCGCCAAGATACAAAACCTGAGCATCAACGAGATCCCCGGGCAGATCGACCGTTTCGACGCCGACGTCGACGAGCTCACCGAGATCCCGGATATACTCATCGAGGAGGGATT---CGCCGATACTACCGCCGATTCCCTGGATGGGATTTCGACGTCTTCGCATCAGTACCTGTCCACGTCGCCCGACAGGACGGACGACGGTAAGATCAGCTTCGAGGACTACGGCTCCAAGTACGACCAAGCGCAAGACGCCGAGCTCAGCGAGTCTCAGCAACAGCCGCAACAGTTCAGACCCAGACCTGAGTACCGGCCGCCGGAGGCTGTTAGACCCGAGGCGCAAGCTCCTACCGGAGGATCGATG…	467	0	95.7	1806
ENSANGP00000020312	GL277768.1	1	2549759 to 2549437	GACTACTA-TATACATGTCGCACAGGTGTCGGCGAGAACGTGGCGGGCCTGACATGCGCCTCTCGAATGGCCGACCTCGTGTTCGACCATCTGGAGCTCGAGCGAACGGCCCACCTCGAGGATCGTCCACTATACTTCCTGCAGTGCGCCATGGAGGAGAACTGTCTGGCGTCCCAGGCTTACCAGGTCCAGAGGGAGACTGATCGCTGGCACTGGGAGACGAGGCGACTGCTCAGGTTCACCGCGAGGATCCTCAACGCCGGCACAGCTGACTTCAGGCCGTCAGTGCCGAAGCATCTCTGGGAGTGGCACATGTGTCACATG	324	5.52e-167	98.8	1551
ENSANGP00000020964	GL276859.1	18	2219687 to 2221168	ATGTCTTTCCTCCGTGGCTCTGCCAACTTTGTTTGGTGTACGACCAGCGTACTGGGCAAAGGTGCAACTGGTGCTGTCTTTCAAGGGGTGAACAAAAATAATGGTGAGCCAGTCGCGGTTAAGACTTTTAATCAAGTCAGTCACATGCGGCCACATGATGTACAGATGCGGGAATTTGAAGTTCTGCGCAAAGTCAAACACGAAAACATAGTTAAATTATTAGCAATTGAAGAAGAGCAGGATGGTCGTGGTAAGGTTATAGTCATGGAATTGTGTACAGGTGGAAGTTTATTCAATATCCTAGATGATCCAGAAAATACTTATGGATTAGCAGAAGAGGAGTTTCTTCTAGTTTTAGAGCATTTGTCAGCAGGCATGAAACATTTGAGAGATAATAAC…	1482	0	98.6	2265
ENSANGP00000021503	GL275162.1	4	2386626 to 2385313	AGAAAGGACAGGTACAATTTGGCCAAGATAGAGTACATGCCATACCTATTGCACAGCAGTAATCCGGCAACGAATACGATAAACCCGAACCCGACCTTTGTGCCGCGCTTCCTGGCACCCGGCACCAACATCGTCGGCGGTGAGGTCGACGGCCAGGAGACCCTGCAGGCGGGCGAGTACATCGTCAAGCGCGACATAAACGTCCGGCCCGGCGGCAAGTTGATCCTTCAGCCTGGAGTCACACTGCGCTTCCCACCCGCGGTCGGCATCATGGTCGCGGGTAAACTGGATGCGCATGGAACGAAGCCCAGCAACATCCTGATGACCCTGAAGGAGGAGATCGTCGTTAGTGCGGACAACGAGACGGTGATGGAGGAGATGATGATGGGCGATAACGCC…	1314	0	98.9	8862
ENSANGP00000022018	GL274178.1	2	1938626 to 1938326	CTTGCTGACGTCGCAAATCCGGATACGAGTAGGCGAGTACGACTTCTCGTCGGTACAGGAGCGATTGCCCTACATCGAGAGAGGCATCACGAAAAAAGTGGTGCATCCGAAGTACAACTTCTTCACCTTCGAGTACGACCTGGCGCTGGTCAGGCTGGAGACGCCCCTGTCTTTCGCACCGCACATATCGCCCATCTGTCTACCGGCCAGCGATGAGCTGCTCATCGGCGAGAACGGGACCGTCACTGGCTGGGGTCGACTCAGCGAGGGAGGCACACTGCCTTCGGTTTTACAGGAGGTT	301	2.13e-153	98	780
ENSANGP00000022132 (LOC100114241)	GL274178.1	2	3146874 to 3147194	CGGAAGGGTCTTCGTTTACGGTGGAAAGGGCGCACTGGGCACCGCCTGCGTCAATACATTCAAATCTAAGAACTGGTGGGTTGGATCAATTGACATGAAACAAAATGAATCAGCAGATGCCAATGTGCTTGTAAATGTTGAATCTGACTGGCTTGAGCAGGAAAATAGTATTTTAACTCAAGTAAAAGAAATTCTTGGGGATAACAAACTCGATGGAGTAATCTGTGTTGCTGGTGGTTGGGCTGGTGGCAATGCTGCAAATAAAGACTTTGTAAAAAATAGTGACTTGATGTGGAAGCAAAGTGTTTGGAGCTCTGTCATAGCTGCTAAAATTGCCTCTGAACATTTAAAAGATGGTGGATTCCTTTCCTTAACCGGTGCTAAAGCTGCCCTCGAAGG…	997	1.39e-155	97.1	1044
ENSANGP00000025183 (LOC100119990)	GL274622.1	3	1885053 to 1885723	CCCATGAATTCGAATCGCTGGTGTTGTCAGACTCCCGGTTCGAGATCGTCGAGGAAGTCGTCCTTGGCCTCGTTTGTTTCAGACTGAAGGGCTCGAACGAGCTGAACGATCAGTTGCTGAGGCGAATAAACGGCGCGGGCAACATTCACTTGGTGCCGTCGAAGATCAACGACAACTTCTTCTTGCGACTGGCCATCTGCTCGCGCTACAGCGAGAGCAAGGACATCCAGTACTCGTGGCAAGAGATCAAGCTACGCGCCGAGGAGCTTCTCGAGGAGCAGTCGCTCTCCAAGTGATGGCGCGCCCGCATAACTCGTAGCTGCAAGGCCCTCACGCCCGTCACCTGCAATCAGTCTTAGGCAATTTTAGCCGCCGCCGCCGCCGCTATGCTGATCTCAA…	757	0	97.3	1908
ENSANGP00000026478 (LOC100122095)	GL277224.1	8	1242305 to 1242149	TTGGCATGAAATGGGTGTTAATGATCTGCCAGCCATGATCGATCACATTCTGAAAACTACCGGCTATAAAAAATTGTTTTACGCTGGACACAGTCAAGGAAGTACAGCATTTTTCGTTATGGCCAGCGAGCGTCCTGAGTATAATGACAAAATTAACGCTATGTTCTCGCTTGCGCCAGTAGCCTACTGCTCGAAGATGTTCAGTCCTATAATGCAATATCTTGCTCGAATCGTAAAACCCATTAAC	247	2.1e-123	98	2286
ENSANGP00000027325	GL274178.1	2	6714632 to 6717770	GAAAANTTGAATTAAAATCGTGTTCATACTGAAAATCCCAATTACGTTCGCAGCTGATCCTTTTATTTTGAACCATGTATTCGTTNNNNNNNNNNNNNNNNNNNNNNNNNNAAAATTCTCGATAAAATGTAGTTCAGTATACACTTTATTCATTATTATTCGAAACCATTGCGTAAAGCTATAATTAACGAGAAGCTGTATAGTTATCATCGCTGTACTTCCTTCGAAAGCCACTAATTAAATTGCCTTAGTGTAATTGTTATCAAAAATCGGAAATTCTATAAGGAAATACTAAAACAATGTTATAATCCCCAACACCGGAAAATCTGCTTCTATACCGCCAGTTTGAACCAAAGGCAATACAAAATTTGGAGCTATTCCTACAANNNNNNNNNAAAT…	3149			5044
ENSANGP00000027407 (LOC100123052)	GL274178.1	2	3902779 to 3902420	GTTATACTTGCAGTTGGAATTACAGCTTTTATTTGCTTTGCTTTGACTTTGTTTTCATTCCAAACTAAAATCGATTTCACTGGAGCTGGAACGTACCTTTTCATTGCCGCCTTATGCCTTATGCTTTTCGGTTTCATTGCAATTTTCTGGCATGGCAGGACTGTAATTCTAGTCTACAGTTGCCTTGGAGCCCTTCTCTTTTCGTTTTATCTGGTATATGATACACAATTGATGCTGGGTGGCAAGCACAAGTATTCATTGTCTCCTGAAGAGTACATCTTTGCTGCACTTAACCTGTACCTAGACATCGTCAACATCTTTATTTACATCTTAAGCATCATTGGCGCTTCCCGAGATTAA	360	0	99.2	939
ENSANGP00000027469	GL275868.1	755	15990 to 16658	GTTAGCCAGCTGGGCGCAACGCTTAATGGAACAACGCAGATACTAGGCTACGCAGATGACTTGGATATACTGGGGGATTGTAGGGAAACGGTAGCAAGAAATGCGGAAATCCTCATAAAAGCGGCAGAGTATACAGGGTTAGAAGTTAGTGAATCAAAAACAAAGTACATGATTGTGGATAAACTAGGCATCTGCAGAGGGGAGGGAGATCTCAGAGTTGGGGATTTTACTTTTGAAAAGGTTAGCGAATTCAGGTATCTGGGTACGACCATAAATGATAGAAACGAGATTAATGTCGAAATAAACAAGAGACTCCATTCGGGTAATGCTTGCTTCTACGCCGTGAGTAATTTACTTAAGTCGAGGCTGTTGTCTAAAAACGTTAAAATAAGAATATAC…	669	0	96.9	2277
ENSANGP00000029153 (LOC100114913)	GL274402.1	82	168401 to 166408	ATGTCAGCGACCGTGGCCGGAAACCAGCAGCAGCAGTACCCGCACCAGGAGTGGGACATCAACGACTCGAACGTGCCGAAGGTCGTGGAGTACGAGGCCTGGAGCGAGTGGGCGGACGGCCACGTGAGGAAGGTCTACCCCGCGGACTGCGAGGAGGCGCGCAGGCACGCGTCCGGCTGGGCGATGCGCAACACCAACAACCACAACGTCAGCATACTCAAGAAGTCCTGCCTCGGCGTGCTCGAGTGCTCGCTCAAGTGCGTCCTGCCCGGCGGCGGCCGCGTCCACCTCCGGCCCGCCATCTGCGACAAAGCGCGGAAGAAGCAGCAGGGCAAGCCCTGCCCGAACCGGCTCTGCACCGGCCGGCTGCAGATCCACGCCTGCAGGGGCCACTGCGGC…	1994	0	97	1983
ENSANGP00000029467	GL275593.1	5	3820051 to 3819648	ACAGGTATAGCCAAGCGTTCGAGCAGGACACACTCGAGCAACCCACTATCAGACTTCAGAACGGCGGCTTCGACGACGAGTACCAGGAGCACACGCAGAGGCGCATAAACTACGACTACCATCCCATAATCGACTTCTTCAAGCCCGATGCGCAAATGCTCAAGTCCGACGAGCCGATGCAGGCGTCCGCCTCTTCGTCGATCCTGCAACAACAGCAGCAGCAGCAGCATCAGCAGCAAATACAGTATCATCAGTCTCAGCAGTTGCAGCAGCGGCCGTCGCAGCTGCAGCACGCGGATCTCGATTCGTGGAAACCCATCTTCAAACCCTGAAATTGCGTGTGATCTTATGCGTGTTCTCTCTCGCTCACTCATCGAATGTACCTGAGACCTAGATAAC…	404	0	96.3	1341
ENSANGP0000003920	GL274307.1	42	698369 to 698780	CAGCCGGAGTGAACGAAGCCGGGGTTTACACGCTGCGCGGTAAGCAGGATGGCGGCAGTAGACGAGGCAAAAGGACAACGANGACNACGACGACGACAACCCCGACGACAGAGCTGCCGTCCAGTAGCAGCCCCGTCGTCAGCAGAAGCAACAGCAGCATCGGTCTGCAACCGACTCTCCTCTCGAGGCACGAAAACGATGACGCGGTCGTCGAACCGGCAGCTCTGCTCGGCGTCGAGCCTCAGGACGCAGCTTGGAGGTCCGATTCCTCGAACACGTCCGGTGACACTATTTCCCTGTCCATGTCCGCCACTGATCCGCCCATCGAGCTCGTCGTCAAGCCACTCAGCAAGGTCGTTCTGCCTTGCGAGCTAGAGGGCAATTCCACGAAGCTGCTCA…	412	0	97.9	1956
Eukaryotic translation initiation factor 4E binding protein (4EBP)	GL274622.1	3	2207364 to 2207527	AGGTACTCGCATTGTGTACGAGAGAGCTTTTCTAATGAATCTCCGAAATTCGCCAATCTCGCAAACACCACCGAAAAATATGCCTACCATACCAGCTAGTCTTCTGAAGGGTGCCGCACCTACCGTCACGTCACCGGACAAAATTCCAAGCCCTCCGGCTAAAG	164	3.37e-76	97	354
Farnesyl Phosphate synthase	GL274950.1	14	125755 to 125988	AGGAGTGCTATGGTATCAATGATCCAGAAAAAATTGCCAAAGTCAAGCAGTTGTACAACGACTTGGGATTGCAAATGACATATTCCATTTACGAAGAGGAAAGCTACAACCTCATGAATACTCATATTCAACAGATTTCGCGTGGACTGCCTCACGATTTGTTCTTCAAATTCCTCGAAAAGATTTATCGCAGAGATGCCTAAACATTATTATATGCGGAAAATTATAATAAGT	234	1.18e-119	98.7	1150
Fasciclinii	GL277768.1	1	3000299 to 3000841	AGATCCGACGACGGTCTGTACGAGTGCATCGCCAACAACAAGGGTGGAATGGCCTTCAAGAACGGACACCTGACTGTCGAGTTCCCGCCGTCGTTCGCCTCGATGAGCAACCGCACTATCTATTCGTGGGACAACCGTCCGGTCAACCTGACCTGTATCGCCGAGAGTATACCCAACGCGACTATTCACTGGACGTACTACGGTAACGACAAGGTTGAGAACGACCAGCAGATCACGGTCTATGACAACGGCCCGATCTCTTCGCTCTACATCAAGCCGCTAGACAGGAGGTACTACACTCAGTACAAATGCCATGCCAAAAATAGGCTAGGCGAAGCTATTCACGTGATGGAGCTCAGGGAGGCTCCCAAGCCCGCCGACATTCCTCAAGTCTCGATG…	543	0	98.2	2319
Fibroniase	GL277513.1	39	437486 to 436796	CAGAAGCCAGTTGGAGCCAAATTCATAGCACCAGCTCATGTTGAGCTTCCAAAATCTGTAGACTGGAGGCAAGAGGGTGCCGTTACTCCTATCAAGGATCAGGGACACTGTGGTTCCTGCTGGTCATTCTCAGCGACTGGTGCCTTGGAAGGTCAACACTTCAGACAAACCGGCAAGCTCGTCTCTCTCAGCGAACAGAATCTGATCGACTGCTCTGGCAAATATGGCAACAACGGCTGCAACGGTGGTCTCATGGACAACGCTTTTAAGTATATCAGAGACAACAAGGGCCTCGACACCGAGTCTACMWATYMMYMMRWSRYKRARRMTKWSGWWKKMYKYYWMWWMGCWSSCAWYRSTGKTRCCSAGGMTGTYKGTTTCGTTGACATTCCTGAGGGT…	1312			1526
GA11750-PA	GL275162.1	4	2022198 to 2023157	ATCGGCGAGACGCAGGTCGACACCCACGAGGGCTCGACGGTGATTCTGCGATGCCGGTTCGAGCCGCCGCGGGACAACGCCACCTTCTTCTGGCTGACGCACACCGGCAACGCGCACGACAACGCCGCGATCGAGAACACGGCTCTGGCGCCCTACTACACGGTCTACATGCAGCCGGAGAAGGGCCGCTACGACCTGGAGATCCGCAACGTCTCGTACGAGCGCGACAACGGCAAGTACGAGTGTCGCGTCAAGGTCAGCGGCACCGGTCGCAACCTCTACCACAAGAACATCACGCTGACGGTGCTGCGCCCGCCGAGTCCGCCCACGATCCTCCCGGTCGCGGCCGTCGCCCGCGAGGCCGAGAAGCTCGAGCTGACCTGCAACACCAACGGCGGC…	960	0	98.4	3504
GA12750-PA	GL277768.1	1	2271068 to 2270646	ATGCCGGCTGACGAGGGACAAGAGTCTACTGGTCTCGTGAGCAGCGACTGGCTGTTCAAGGAGCTCCGCTGCCAGGGCCCGTCGCAGACGACCACGAGGCTCCTGGTGCTCGACTGCCGCGGCGGCGGCGAGTACGCCGAGAGCCACATCAGGGGCTCCGTAGCCCTGGCGATACCGAGCATCATGCTCAGGAGACTAGCCGCGGGCAAGGTCGAGCTGCTCTCGACCATCAAGTGCCTGGAGCTCAGGTCACGCGTCGAGATGCTGCTCGGGGTCAGCGAGGAGGAGAGCTGCGCCGACAAGAAGGGCTGCTTCGTCCTCGTGGGCGATTCCACCGAACCTGCCGGACACCAGGGAGAGACCATTCACGTGCTCGCCAGGAGACTCAGGAGCTGCGGC…	423	0	98.8	1764
GA13855-PA	GL276289.1	17	979964 to 980542	GCGATGGTGTGTGTACTGTCTTCGGCGACCCGCACTATCGGACGTTCGACGGCAAGTTCTACACGTTCCGGGGCTCGTGCAAGTACCAGCTGGCGAGCGACTGTTCAAACCACACGTTCAGCATCCGTGTGACCAACGATGCTCGGGCTACGCGACTGTCAGCCTGGACCAAGACCATATCCCTGAAGATCGGCGACCTCAAGGTGAACCTGGGCCAGAGGATGCGCGTCAAGGTGAACGGACGCAGGGTCGAGGTACCATTCCGTATGGCTAACAGGTTGGACATCAACCGAACGCTGGACAGCATCTTGGTCAACACTCAGCTGGGCATCAAGATCCTCTGGGATGGTATCAGTTTCCTGGAGGTGTCGGCGCCGACGTCCTACAGGGGAAAGCTGT…	579	0	99	1971
GA14061-PA	GL277538.1	9	3065519 to 3067396	ATACGAGTGGATAAAGAACGGCAAAGACTTCAAATGGCAAGCCTACGACGACCGTATATCGCAGCAGCCGGGCCGCGGTACTCTCGTGATCTCGAAGCCACGTGACGAGGATCTTGGACAGTACCAGTGCTTCGCAAAGAACGAATGGGGTATCGCCACCTCGAACTCGGTCTTCGTGCGCAAGGCCGAGCTGAACTCCTTCAAAGACCAGAATCCAGTGACCCTGAGTGTATCGGAGGGCGATCCCTACAAGCTGACCTGTCAACCACCGGACGGCTGGCCTAAGCCCAACGTATACTGGCTCATACAGGACCATGCCGGTACCATCAAATCCATCAATAACTCGAGGATGACTCTCGATCCGGAGGGTAACCTCTGGTTCAGCAACGTCACGAAGCT…	1878	0	99.2	3765
GA14181-PA	GL275014.1	24	965761 to 965487	ATAGGGCGAAGGTGATATACGCCCCGAAGGAAGTGTACCTGCCTTACGGGAAGCACGCGCTTCTGGACTGCCACTTCCGCGCTAATCCGCCCCTGACGAACTTGAGATGGGAGAAGGACGGCTTTCTCTTCGACCCCTACAACGTGCAAGGAGTCTTCTACAGGAGGAACGGCTCGCTCTTCTTCAACAAAGTCGACGAGAGCCACGCTGGCAGCTACAGCTGCACGCCGTACAACGCTCTAGGTACCGAAGGTCCGAGTCCTCCCATCACGGTT	275	1.3e-146	99.6	2016
GA14244-PA (LOC100122487)	GL276796.1	28	1536034 to 1536560	GTACTTTTCACTTAGTCGTGAACTTGCTGGTGCAAATAATGCTGGGAATTCCACTGGAAATGGTGCACAAGTGGTGGCGAGTTCTGATTATCTACTTTGCTGGAGTGGTAGCCGGTTCCCTGGGTACATCCGTCTCCGATCCTGCCGTATATCTGGCCGGCGCATCCGGTGGCGTCTACGCTCTCATAACTGCGCATGTAGCAACCATCGTTATGAACTGGTCACAAATGGAATTCGCAGTGCTACAGCTGCTGGTATTCCTCGTTGTAACATCGGTCGACGTGGGCCAGGCCATTTACACGCGCTATGTTCTTGAAACGACAAATCAGATCGGCTACGTTGCTCACCTCGCAGGTGCCATAGCCGGCCTCCTCGTCGGTATCAATATCCTGCGCAACC…	527	0	99.2	1110
GA15338-PA	GL277373.1	40	1587018 to 1587833	ATGGAGCCGTCGTTCTACGATCAGGAGGTCATCTACGGCAACGGCCACAATCGGATCGGCGCCGGGCCGATCGGCAACGAGATCGGCAGCATGAAGCGCTGCAACCTCAGCCTGGACCTGAACGGCGCGAGACAGGGCGGTCCTCAGTCGAAGCGGCCGAGGCTCAGCCAGCTGACTCCCGGCATCACCGGCATAACTCCGCTCATCAACTCGCCGGACCTCATGAAGCTCGGCCTCACCACTCCCGACATCGAGAGGTTCCTCAACGCCGACGGCATGATCCCCAGTGTGCCGACACCCGTCGGCGGCTACTTCGACAGCAAGCTCGTCACCGAGGACCAGGAGAAGTACGCCCAGGGCTTCGTCGACGCGCTCAACGAGCTCCAGAACTCGGACAGC…	816	0	99	816
GA15974-PA	GL277768.1	1	3260999 to 3260050	GCGGTGCCGAGCTTACTAACGGCCTGGGCCTAGCCAAGGAGGCGTCGGAATCGGCGGCTGGAGGAGGCGGTAGCAGCAGCGCTGGCAGCAGCAGCCCGACTAGTCCTCTGCCAGAACCGGCTAGGACGGTCGCAAAGAACGGCAGCGTTGCCGAGACGGAGCTCAGTAGCAGTAGCAACGGCCTCAGCGGTGACGAGGCGCCTTCGCCCCTACAGCCGCCGTCATCCGCTAGTTCTGGCTTCAGCGACGATGACAGTCTCCACGGTGACCTGGGTCTCCAGGCTGTCAGTATGGAGCAGCTCATCGAGACGATACACGCCAGGGGACGAGCTGCACTCGTCGCCGAGTACATGGAAATCAAGCAGCGTCCACCGGAAGGCTCTTTCAATAACGCCAAGT	399	0	99	1971
GA16078-PA	GL277921.1	31	790395 to 790846	CAGCGCCGTTGGTGCCTAAAGAGCGTGATATAATAATAGCCAACGCCACGTCTGTGCGACTGTATCTCTTAAATTGGCCAAACGGTGATTGTCCGATTGAGTACTACACTGTTGAATTTCGGAAAAAAGTCGGCGCGGAACAGTGGAATCTCGTGACTAGCCAAGCCACCGATAATATCATCATACGGGATCTGAAACCCGCGACTTGGTACAGTCTGAGGCTAACGGCGCATAACGATGCTGGCTCAACGCAAGCCCTCATGGACTTTGCCACGACGACTTTGAGTGGAGTTAGTATCGGACCCATTAACGATCTCGTCATGGACGAGGACTCGATGAGATCGGCCTCGAGTTACAAAGCTCTCTACGTCGCCATACCACTTGCCTGCACCATCATAC…	452	0	98.9	5691
GA16177-PA (LOC100119373)	GL274528.1	193	37827 to 38243	CCATAATGTAGCGAAAACTCTCGATGAGATGTTGGCATACAACGTATCTGTAAATATTTACATGTACTATGGTGGAACAAACTTTGCCTTTACCTCTGGTGCAAACATCAATGAAAATTATTGGCCACAACTGACTTCTTATGATTACGATGCCCCACTCACTGAAGCGGGCGATCCTACGTCAAAATATTTCGAATTAAGAGATGTCATAGCTAAGCACATGCCACTGCCAAACTTGAAAACTCCTGCTGTTGCTCCAAAGCGTGGTTATGGTGTTGTCACTATGACACCGAAAGTCGATCTCTTTTCTAAAGCAGGCCGAAATACTTTCGGAACTGTGCGGGCTGAATTTTCAAAACCACCAACATTCGAATCTTTGGGCCAGAACAACTACCTAGT…	1033	0	98.6	1890
GA17600-RA	GL277373.1	40	1843820 to 1844086	GGCTGGAACGCTTTCTTCTCCTATTTGAGAAATAGCTCGTCGAGCTGGGACTGCGAGGACGAGAAGGCGATATCTCAGTTCTTCAATCAGACTTGCGTTTACGGGCTAAACGAGAAGAATACCACGGTACCGAAGAATCTCTACTCATTGTGCAATAAGACGCATTTCGAGGACAAATTGGGACCAGAAGAGAACGCGTTCAAGTGCTTGATGAAAGGGGGAGACGTCGCTTTCGTTAACGTCAGCGCTGCTAAGCAGTATTACTCA	267	2.5e-138	98.9	3036
GA18766-PA	GL275793.1	16	2641216 to 2641514	GCCATCCTCAGGCTGACCAGCCCCATCAAGTTCGACGCGGTCCAGAAGAAGATCGACCTGCCGACCAGGGACGTTATCTCGGGCGAGAGCGCCGTCATCACCGGTTGGGGTATCAAGAAGTACCCATCCAACTACGTCTCGCCGATTCTCCAGAAGGCCGCCATGAGCATCATCCCGAGCAGCCGGTGCACCACAAGGATGTACCCGCTCAGACTCCACGGCGAGCAGGTCTGCGCCCTGCAGAGGAAGGGAGTCGGCGCTTGCTCCGGTGACAGCGGTGGCCCACT-----CGCCGTCAACAAACAGGTCGTCGGTATCGCCTCTTGGGTCGTTCCCTGCGGAGAAGGCTACCCCGACGTTTACACCAAGGTCTACGCCTACAAGAGCTGGATCCAGG…	419	3.23e-152	98	822
GA18922-PA	GL277224.1	8	464082 to 463463	AGAGCGAAGACCTGCAGTTCATCTCGAGCAGCGTGCGGGTGGACCTGCGCTTCAACAACATATCCCGCGTCGTCCTGGCGAGCCTCGAGCTGATCGCCTCGAACCAGAGCGCGCCGCGCGACGTCACCGTCGAGATCGACGAGAACCCCATCCGCTGCGACTGCGAGGTCTACGAGCTCCTGCGCTACCTCAACGGCGACATGCAGCCCTTCGTCCAGAAGTACGTGCACCTGAAGCCCGGCAAGCTCAGCTGCAGGAGCCCCGAGTACACGCGCGGATCGCAGCTCTTCGAGCTCAAGGCCAAGTCGCTCAAGTGCCTGATCGAGAGCGAGCAGCCGCGGCCGGGCGACCCCTGCTCGCCGAACGGCGGCGCCTGCACCTGCTGGCGGCGGCCCGAGG…	620	0	96.8	3153
GA19176-PA	GL275162.1	4	2077227 to 2076805	ATGTGGAAGCAGCCTGCCCAGGAGTTCAGCGAATGCTTCGACGGCATTGACAAGTGTGGTCAGGAATCGACTGGAGACTCTGGATTTTTGTCCAACACCAACTCGGCCAGCTACACCTACAGCTCCGAATTGTCTTCTAATTCCATCGTAGAGGATTCTCAGCCAGTACCTGTTCAGTCACCAAAAGAGATGGACAGTGGAATCGATTTTGGACTCAGTGACAGCTTTAATCAGCTGTCACTGAAACAGATGTCTTTGACTGCTATGGATAACAACAAGGTGTACCTAGAGCCAGTAATGGAGTCAACACTTGTCAGTATTGACTCTGGAAGAGTATCCATGACTACCAGCAATGGAAAGGCTGAGGAAGTTTGCCAAGAACCATGGCAGCTCTACTAC…	423	0	99.3	1107
GA19584-RA	GL277538.1	9	366633 to 366287	CAGGTGTGCTTGGGCTGCATTTGCGAAGCGGCGTCTGGTTGCAACACGACGATAGGATGCGTCGGCGACATCTGCGGACCGTTCCACATCACCTGGGGATACTGGTCCGACAGCGGCAAACCGACCCTCAACGGACAACCCGCTTCGGATAACAATGCCTACGCCAACTGCGTGAATGACGCCTACTGCGCAGCTCGGGCTGTCCAAGGATACATGGACAAATATTCCCAGGACTGCAACAACGA------------TGGAACGATCAACTGCGATGATTACGCTCGCATTCATTACCTGGGCGGCTACGGATGCGGGGGAGCTCTGGAGAAGAGATACGAGAATGCGTACTACAACTGCCGTAACAGTTTCGCCCAGTAATTTTAATAATCTTTGACT…	649	3.95e-123	88.5	1147
GA19603-PA	GL277538.1	9	4337671 to 4338121	GGTCCCAGGATCACCGCGACTTCGTCCCGGCGGCGACATTCCGTCGTTCCCAGGCTTCTCGGGAGCACCGGGAACCACCACACCGACCCCCGACATGAACGTCTACCAACAGAAGAAGACCATAGCCCAGGGGATGATGGACCTCGCGCTGATCTCCGCCAACGCCAACCAGCTCCGTTACGTCCTTCAGAGCAGCGGCAGACATCCCTACTACTATCCGTCCCTGTCGATGATCGGTTTGAGTCTGTTCCTCCAGGTGGTCGTCGGTATCGGCCTCATCTGGAACAGTCGGTACAACGTCAAGGTCGACGACCAGATGTGCAAAGCCAACAGGGCCAACAATTGGACCGTCATCGCCGTGTTCCTCGTTACCATTCTCAATGTTTTTATATCGTCTTT…	451	0	99.1	816
GA19603-PA	GL277538.1	9	4337671 to 4338121	GGTCCCAGGATCACCGCGACTTCGTCCCGGCGGCGACATTCCGTCGTTCCCAGGCTTCTCGGGAGCACCGGGAACCACCACACCGACCCCCGACATGAACGTCTACCAACAGAAGAAGACCATAGCCCAGGGGATGATGGACCTCGCGCTGATCTCCGCCAACGCCAACCAGCTCCGTTACGTCCTTCAGAGCAGCGGCAGACATCCCTACTACTATCCGTCCCTGTCGATGATCGGTTTGAGTCTGTTCCTCCAGGTGGTCGTCGGTATCGGCCTCATCTGGAACAGTCGGTACAACGTCAAGGTCGACGACCAGATGTGCAAAGCCAACAGGGCCAACAATTGGACCGTCATCGCCGTGTTCCTCGTTACCATTCTCAATGTTTTTATATCGTCTTT…	451	0	99.1	816
GA19768-PA (LOC100116063)	GL275014.1	24	7806 to 8840	GGATGGAAGCGACTCATTTGGGCGGACAAGAATGTCAGGAATCTGTTCCTTTTCCTCATATTGAACTTCAGCTTTGCATTCGTAGAGCTTACATATGGCGTTTGGACCAACAGTTTAGGACTAATATCGGACAGTTTTCACATGTTCTTTGACTGCACTGGCCTAATAGTTGGTCTATCTGCTTCAGTAATAACAAAATGGCGAGCCAATGAACGATTTTCCTATGGATACGTGAGAGCTGAAGTACTTGGTGGTATGGTGAATGGACTGTTTTTGGTCTTTGTGGCATTTTTCATAATGTCAGAAGCTGTGGAAAGAGCCATTGAACCTCCGGAAGTCAAGCATGAGAGACTGTTCTTGGTATCTGTACTTGGCCTTTTGGTGAATATCATAGGAATT…	1035	0	98.7	1158
GA20050-PA (LOC100119672)	GL275180.1	44	641214 to 641758	ATGTCCTCGGGCCACAGCAGCAGGAGTCGAGCTGTGCATATCAGCTCGATCTTCCAGAAGCTGCAGGGGCGCTTTGCCGATGCCATGACACCACCAAAGCTCTCCACGGACAAGAGGATGCTTGACAAGACGTGGAAGCTGATGGACAAAGTTGTCAAACTGTGTCAGCATCAGCGCATGAACCTCAAAAATTCACCGCCGTTCATACTGGACATATTGCCAGACACATATCAGCGTCTCAGGCTCATCTACAGCAAATACGAAGACCGCATGCATGTGCTTCACAATAATGAGCACTTCTGTGTTTTCATAAACAATTTAATGAGAAAGTGCAAGCAGGCGATCAAGCTCTTCAAGGAGGGCAAAGAGAAGATGTTCGACGAGTCATCTCATTACAGG…	545	0	99.6	2001
GA21569-PA	GL277224.1	8	2106839 to 2108161	ATGCCAAATGCGTATCTCTACCTGACGACAAAAACGAAGGACTAACGGTCATCCGAACTGACGAGACCAGCGTTCTGGTCCCATTCAAACAAAACGTAACGCTCAAGTGTAACAACAATGGACGTTCTCTTCGTAATACCGCAACTTCCAGCTTCCGCCAATGTGTATACGACCCCAAGCCTGGTTATCCCGACTACTGGCTATCAGGAACCACACCAGCTTGCCCAAGAGCCGATTGTGGAAAGCCTCTTCCAACTCCTGGTGCTGAATATGGACAATACATGGACACGAAATACCAATCATCCTTCTTCTTTGGCTGTCAAGACACCTTCAAACTGGCTGGACAAACCAACCGCCACGACAACGTGGTTCGTTGCCAAGCCAACGGAGTCTGGGACT…	1323	0	98.5	13398
GA22158-PA	GL276289.1	17	214829 to 214568	AGAAATTCCCGAGGAGTCGAGTCGGGCTACCATCAGCAGCAGCAAGGGGGTCGCACGCGCTTCCAAAATCCGCTGCTCGAATTTGCCTCGCGTACGAGAAATCGGGCCAAGAGACAATCGGAATCGGCCGACGTCTCGTTATGCCCGACGCGCTCGCAGTTCGTCACCCCCAAGGCTGCCCTGAACAATCAGGGGAACTGGATGTACGTCGTCAACCTGGAGGACCAGAACAAGCACTCACAGCTTGTCAAGAGCGAAGTTT	262	1.17e-137	99.2	1005
Galectin4-like protein	GL276746.1	77	434604 to 435079	GAACTGCCGTATGTTGGCGAGGTGGAAGGAGGTGTTACACCTGGAAAAATGTTGAAAATTCAAGGCAAAGTTCCAGAGGACTCGAGACGCTTTGCCATTAATTATCAGTTGGGTCCCAATTTGAATCCAAGAGATGACATTGCCATTCATGTTTCCCCTCGTTTTACCGAAGGATTCATCACGAGAAATCACATTGAATCTATGACTTGGGGTCCGGAGGAAAATGATGGTCCAATGTGGATTCAGCCTGGCACACCCTTTGAAATCATTGTATTATGCGAGTACCACTGCTACAAAATTGCTGTTAATGGTAGACACTTTACGGAGTTTGCTCACAGGCTGCCTTACAATAAAATCACACACCTGGTTATCGATGGAGAGGTAGAGATTTCGTCCATC…	476	0	97.9	1507
GATA binding protein 4	GL274178.1	2	6389579 to 6389965	GATCACCACAACGACCTGCGCTACGCCTCGTCGCAGCCGTCGTACGTCTCCAGCCTCTACAGCCAGCCTCAAACCACTCGGGTATCAGCCATCTCTTACCAGTCGGGGATGTCCAACATCTATTACGACGTGATGAGCCAACAGCAGCAGCAGCAACAGCCCCAGAATCACATGCTGGAGAACCACCACTCGCCAAAGGTCGAGTGCCCGTCGCCTCCGTGTGCCACGCGTTCTCCAGTCCTCGGCTCCGCTGGTCACTCTCCTGACCATCACCAGATGGCCTCGTCGCCGCACATCGTTCCGCTCAACAACTCGTCGCCTGGTCCCGCGGGAAAACTGCTCATCGATACCATCGAACGGCCCACCGTTGTCTCGATATCGTCATAG	387	0	99.2	2835
GH14967p	GL275162.1	4	1006653 to 1006989	GAACGACCACGATCACACATGAGGCTGACGCCAATGCTGAGCGTGATGATAGGTGTAGTGGCGGCCCTGGTGATAGTCGCGGTGATAGTGATGATCGTCCTACGCATCCAGCACTCGCAGGCCGACGAGCAGTCCAAGTCCCAGGTGGAGGACAGCACGAAGCCGGCCAAGAACGTACCGATACAGCGGGAACTGCGCTTCCGGGAGTGCGGCAGCCTCATCACCGACGAGAAGAACCCGGACGCCAGCCCTTTCGGCAAACTCGACACCATCAGCGCGGGAGACGTCAGCGAGTCGGACGAGAAGAATCCTGACATCATACCCCAGCAGATAACCG	337	2.18e-175	98.5	2922
Glutathione S-transferase	GL274210.1	22	25978 to 26465	GCAAAGTTACGATCTCCCGCTATCTAAATTACACACAGCCACGCCGGTTGCCCGGTTCTCGTGATATTTTATTAGTCGTGTACTCGTGTCCAGGAAGATTGTAGACAAAGAGTTAAGAAAAATGCCGACCTACAAGCTGACATACTTCCCTGTCAAGGCTCTTGCTGAACCCATTAGGTTCCTCTTCAGCTATGCTGGAATCGAATTTATTGATGATAGATTTGAAAGGGAGAATTGGCCAAACATCAAGCCGACCATGCCGTTTGGTCAAGTTCCAGTACTGGAAGTTGATGGAAAGAAGATCCATCAATCTACAGCAATCTGTCGCTGGCTAGCTAAGCAGCATGGTCTTGCTGGCAAAAATGACTGGGAAGCTCTCGAGATCGACGCTGCTGTTGA…	974	0	97	1058
Glutathione S-transferase like protein	GL276749.1	7	2558003 to 2557686	CGCGACTCTTGCACAGTGCAGACCTACGGTGTGTCTACTCGACTTTGATCGTTGATTTTTCACTTCGACACTTCTTCTCGACAAACTAATCGAAGATGCCGGTCGATCTGTACCAAGTTCCC-GGAAGCGCCCCTTGCCGGGCCGTCCGACTGGTCGCCGCTGCCCTCGGGGTCGAGCTCAACCTCAAGCACACCGACCTCATGGCCAAGGAGCACCTCAAGCCCGAATTCATCAAGATGAACCCACAGCACTCCGTGCCCACCATCGACGACAATGGATTCTACCTGTGGGAGAGCCGAGCCATCTGCCAGTACTTGGCCGATAAGTACGGAAAGAACGACTCGCTCTACCCCAAGGACCCGAAGCAGCGCGCCGTCGTCAACCAGCGACTGTACTTC…	937	1.82e-154	96.5	952
Glutathione S-transferase S2	GL275793.1	16	3889167 to 3889385	GAGAAGAATAAAAGATGCCGTCCTACAAGGTGACTTACTTCAACATCAAAGGCCTCGCCGAGCCCATCAGGTTCCTGCTCAACCACGGCGGCGTTGACTTCGTCGACGAGCGCATGAACGAGGACGATTGGAAGAGAATCAAGCCTACCACACCCTTCGGTCAAGTGCCGATTCTAGAGGTCGACGGTAAAAAAATCAACCAGTCCACGGCGATCTGTCGTTACCTGGCCAAACAGTTCGGTCTGACCGGTAAAGACGACTGGGAGAACCTCGAGATCGATGCGGCCGTTGACACCATTAACGACATGCGCGTCAAGATCACCTCTCCTCACTACGAGAAGGTTGCCGAAGCGAAGGCGCAAAAAATCGAGCAGGCGAAACAGGTGGTGCCGTTCATTT…	691	5.32e-99	95.4	765
Glutathione S-transferase T2	GL277224.1	8	261803 to 261523	CGCTGGTGCTATCAGGACAGCCGGTATTGGTATACAACAAGTAGTCACAGTTTTTCACCATCAGCATCTGATCCTTCGATCATTATTTTCATTTTTGCGACCCTAAGAAACCCCAACGGCTCAAAATGAGTGTAAAGTTTTACATGGACTTGATGTCGCAACCCACGAGGGCACTGTACATATTTATGAAAAAAACAAATATACCTTTTGAGAAAAAATTCATGAATCTGAAGAATGGCGAGAATTATAAAGACGGATTCGAGAAGATCAGTCCATTTAACAAACTCCCCGTCATCGAACACAATGGGTTCAATCTTACCGAGAGTGTGGCGATCGTGCGGTACCTCGCACGCGAGTTCAATGTCGAGGACCACTGGTACCCGAAGGATTCCAAGGCCC…	965	4.56e-137	97.9	1034
GNBP 1-2	GL274178.1	2	6203216 to 6203711	GGTAGCAGTAGTAGACATCCATGTGCTGGACAGCTTCTTTTCAAGGAAGACTTCAGAGATCTCGCCCAGTTGAGGAGGATGCAGTGGACTGTGGTTGAGCGGTTCTCTGGGTCACCCGACTACGAATTCACCGTTTATCGAGATTCGCACGAGAACTTGAGAGTCGAAAACGGACTGAAGATCAAGCCTAGACTGATGAAGAACGAGTATGGTGACATCTTCGTCCGCGAGGGCAACCTCACGTTGGCAAAGTGCACAGGACGTTATACGACGACCGACTGTTTCCGCGAAGCTCGAGGCTGGTACATCCTGCCACCTGTGTCCTCCAGTCGGATCAACACCAAGAAATCCATCAACTTCGAGTACGGTCGAATCGAAATCAGAGCCAAGTTCCCACGC…	1005	0	98.8	1690
GS	GL277768.1	1	9358586 to 9359305	AGGGCTGCGGCTTTGATATCGGCAGGTACGACAACGTGGCAGCCTGGCACGAACGATGCAAAAAGGCCCTGGATAAGTACGGCTTTGAGGAGATTAACGAAGCCGGGTCCCGGACTCTGGGCGGCTTTTACAAGGCGAATTTGAAAGCTTAATCGTCGCTGTACCGACGAAGGGCGTTTTCTCGGGGAAAAATGAGCCGAGAGATCGCCACTTTGTTAGTTATGGATGTATAGTTTGTTATGAATATGGATCGGGTCCAATTACTCGGGCATTATACTCGTTATTCACTGCTGGGCAAACAATCGAATCTCTGAAATCTATAGCTGTATTTATATTATTTTTGTGCGAAAATTACGCGCAGTGAATGACGGGTGTACATTGCAGTATTTTTGTTTCTAT…	735	0	94.3	1567
Gst T3	GL277224.1	8	264589 to 264376	GGTAATCAAGGGAAATGAGTTTAAAACTTCACTACGATCTGCTGTCTCAACCAGCAAGGGCTCTATATATTTTTTTGAAAAGCTGCGATATACCGTTCGAATCAAACGTCATCAATTTAGCGAAACGCGAACACTTGCAGCCAGGATACGAAAAAATTAATCCTCTTCGTAAAATCCCTGCGCTGGAACATAATGAGTTCAAACTAACCGAGAG	214	1.5e-106	98.1	724
Heat shock cognate 70 protein	GL274950.1	14	3202087 to 3203719	GATGCGAAACGTCTGATCGGAAGACGCTTCGATGACCCGACGGTCCAGAGCGACATGAAGCACTGGCCTTTTACGGTCATCAGCGACGGCGGCAAGCCCAAGATCCAGGTGAACTACAAGGGCGAGACCAAGAGTTTCTTCCCCGAGGAGGTCTCCTCGATGGTCCTAGTCAAGATGAAGGAGATCGCCGAGGCCTACCTTGGCAAGACCATCAGCAACGCCGTCATCACCGTGCCGGCTTACTTTAACGACTCTCAGCGTCAGGCGACCAAGGACGCCGGTACGATCTCCGGTCTGAACGTACTTCGCATCATCAACGAGCCGACCGCCGCGGCCATCGCCTATGGCTTGGACAAGAAGTCCTCCGGCGAGAAGAACGTACTGATCTTCGACCTGGGC…	1634	0	80.9	2240
Heat shock cognate 70 protein	GL274950.1	14	3202087 to 3204227	GATGCGAAACGTCTGATCGGAAGACGCTTCGATGACCCGACGGTCCAGAGCGACATGAAGCACTGGCCTTTTACGGTCATCAGCGACGGCGGCAAGCCCAAGATCCAGGTGAACTACAAGGGCGAGACCAAGAGTTTCTTCCCCGAGGAGGTCTCCTCGATGGTCCTAGTCAAGATGAAGGAGATCGCCGAGGCCTACCTTGGCAAGACCATCAGCAACGCCGTCATCACCGTGCCGGCTTACTTTAACGACTCTCAGCGTCAGGCGACCAAGGACGCCGGTACGATCTCCGGTCTGAACGTACTTCGCATCATCAACGAGCCGACCGCCGCGGCCATCGCCTATGGCTTGGACAAGAAGTCCTCCGGCGAGAAGAACGTACTGATCTTCGACCTGGGC…	2141			2394
Hemolymph proteinase 6	GL275930.1	286	149138 to 148844	AATGATCGACAAAATCGAGTGCAGCGTAGCGTACAGGGGCTTCTCAAAGTTGCCCAATGGTCTGGACGGGAGTATGATTTGCGTACTAGACAAGAACGTGACGAGGCGAGCAGATGCCTGTCAGGGCGACAGCGGCGGTCCTCTTTTGCTGCTATCGATGGTGTCAAGCACCGTTCTCGGAGTCACCTCCTTCGGCCAGAGCTGTGGCAGCTCCATACCAGCCATTTATACATCCGTTATATTCTACCTTGACTGGATCGAAGATATGGTCTGGCCCGACAAAAAACGACCCTGA	295	1.07e-156	99.3	1155
Hexamerin 70b	GL277224.1	8	756122 to 756638	CTTCTACGGACACAAGCAGCTCTTCAACCGCTACAACCTGGAGCGCCTGTCCAACGATTTGGGCAAGGTCGAGGACTTTGACTGGGACAGGCCTTTCTACCCAGGATTCTGGCCGTCCCTGAAATTGCCCAACGGACTCCAGTTCCCCTCCAGAAACAGCAACAGCTACTTCCCCAAGTACAAGTTCCAGAAGATTCACGAATGCGAGGAGTACGAGACCAGAATCAGCCAAGCTGTCGACGCAGGCATCATCTTCAGCAAGGACGGCAAGTACGCCAAGATCTACACGCCCGAGGGTCTGAACATCCTCGGCAACATGATCGAGGGTAACGCCGACTCGCTGAACGAGCAGTACTACGGCAACATCGACATGCTCATGCGCAACATCCTTGGCTTCAA…	1387			2317
Hexamerin-83	GL277724.1	8	447238 to 446290	TTCCGCATGAGCTTCCCCTTCTGGATGGACACCAAGGACTACGGCGTGCCCAAGAGCTTCCGCGGTGACTTCTACTACTTCATGCACAAGCAGATCATGTCGCGCTACTACCTCGAGCGCTTCTCCAACGAGCTCGGCGAGATCGAGGACTTCAGCTGGGACTCGATGAGCCTGCCCGGCTTCTACTCGGACATCAGCTTCTTCAACGGCGTCTCCATGCCCCGCCGCGACTGGTGGAACGTAGTGCCCTTCTACAAGTACAAGTACGTCGAGTACATCAAGCAGCTGGAGACCCGCATCCTCGAGGCCATCGACTCCGGCTTCTTCTACGACACCATGGGCAAGCAGATCAACTTCTACACGCCCGAGGGCCTCAACTACCTCGGCAACATCATCGAG…	1574			2360
High Glx storage protein/ Hexamerin 109	GL276103.1	36	124855 to 125802	AGGAAACTGGCACTGKGRMTACKYRYACAARRARYACMSWGRWMRCTACWASWACSSACACKGKSMMCAMWMCTACTACAKCCANNNNNNNNNNNMCAGCMATYRCTNNNNTKCYCRYTACAASMYYGASYRYCYTNNNNNNNNNNNNNNNNNNNNNNNNGGMCAGGRASKTKMCACGGCCAAAGAGGT-------TACCGCGGCCA---GGAAAGTTACCAC--GTCCAATACCCGTACGTCTATCAAAAGGGTACCGAGCAGCCAAAAGGCGGCAAATA--------------CCAGAC----CTACTACAAACAGG--GAGCTTACC---AC-----GGCAGCG-------GATACTACCCAG-GTGGACACTACAGCCAATCCCA----------…	1010	0	98.7	2887
Hiraku genki CG2040-PB| isoform B	GL274073.1	12	1813584 to 1813374	GGTAAATGGTCGGCAGATGTGCCTCACTGCGAGGCGATAATCTGCCCGGCGGTGCAGCCTATGAACCCGAATCTCCAGCTGTTGGAGCACAACAACAGCTACGGCGGCCGAGCGGTCTTCACCTGTATGTGGGGCCATCGGCTTCGCGGCCCGCAAGCCATCAAATGCGGCAGCGACGGTGCCTGGAGCGGATCGATACCCACCTGCACGG	211	5.14e-108	99.1	1332
HSP	GL276723.1	87	386150 to 386449	GGTATTTTCAATGAAGAAGAAGTTAAAGATCTCATCAGTTACGTAAAAAGGACTTTAAAAAATAAAGCTCACGATGTTAAAATAACTAATCGTTTAGAGTTTCACCCTTGCGTTGTGACAGTTCAAGATATGGCGGCAGCAAGGCATTTTATTCGTACTCAAAGCCATCAGTTTAATGATGAAATGCGTTATAGTCTACTTCAACCACGTTTGGAAATCAATCCACATCATCCGTTAATTAAAAAACTTATAAAACTAAAAACGTCTGACAAAGAAATTGCTGATATGCTAATTGAACAG	300	4.92e-161	99.7	2244
Hsp 20.6	GL277224.1	8	1455564 to 1456350	AAAGTATCACAATACACAGTATACGACGAGAGATCGAGTCTCTGTGAGAAGTACACACACACACACTTACACACATCGTTGCGAATCGATATTGTCTGGTGCGTTCCGAGTGCGTGCGTATCACACGTCCTGTACAGAAATCGAGAGATTTTTCTGAGAAAAAACGTGCGGCGAGTTTTAACGAGCAGCAGCAGAAGAAGCAAAAATGGCGGACAGCGGCATCAAGCGTAACATTCCCATCAAGCTCGGCGACTTCAGCGTCATCGACAGCGAATTCTCCAACATCCGCGAGCGTTTCGACGCCGAGATGAGGAAGATGGAGGAGGAGATGTCCCGCTTCCGTAGCGAGCTCATGAACCGCGAGAGCAACTTCTTCAAGAGCACCACCAGCACGACGAC…	1373	0	98.6	1822
Hsp70	GL275593.1	5	974200 to 972202	AGGTTTGACGACGAGAAGATCCAGAGCGACCTGAAACACTGGCCGTTCAGAGTCGTCAACGAGGGAGGCAAACCGAAGATCGAGGTTGAATTCCGCGGTGAGAGAAAAAGGTTCAATCCGGAGGAGATCAGCTCGATGGTCCTGACAAAGATGAAGGAAACAGCGGAAGCGTACTTGGGATCGAAGGTGAAGGACGCGGTCATCACGGTGCCCGCTTACTTCAACGACTCACAGCGCCAGGCCACCAAGGATGCTGGAGCGATAGCCGGTCTCAACGTACTCAGGATCATCAACGAGCCCACAGCCGCGGCCCTCGCCTACGGCCTCGATAAGAACCTCAAAGGGGAGAAGAACGTCCTCATCTTCGATCTTGGCGGTGGAACCTTCGACGTATCCATC…	2597	0	98.5	2482
Hsp90	GL276173.1	6	1790094 to 1792532	AGATGGTTGACGCTAAGACTGACAAAATGGAGACTGCAGGAGGAGAGGTTGAGACCTTTGCTTTCCAAGCTGAAATCGCCCAGTTGATGTCCCTCATCATCAACACTTTCTACTCAAACAAAGAAATCTTCCTCCGAGAATTGATTTCCAACTCCAGTGATGCTCTGGACAAGATCCGTTACGAATCTTTGACAGACCCCACAAAGTTGGAGGCTTGCAAGGAACTCTACATCAAGATTATTCCCAACAAGAATGATCGCACACTGACCATCATCGACACTGGTATTGGTATGACTAAAGCCGATTTGGTTAACAACCTTGGAACCATCGCCAAGTCCGGAACTAAGGCCTTCATGGAGGCTCTCCAGGCTGGTGCTGACATTTCTATGATTGGTCAGT…	2439			2453
Hymenoptaecin	GL277724.1	8	2158914 to 2160127	AGAAGAAAAAAACCAACAAACATCATGAAGCTTTCGATTGCTGTTGTGTCGCTGTTTTGCATCGTCGCATGCGCCCACGCAACTTTTGCACCCACTAGACCTGGACAGCCATCATTTCCTTATCCTGGTACTAGAGGAGGATGGCCCCCAAGATCTACAGGACCAACTTTCCCTCGCCCTCCCCAACAGCCCGTAAGTTTTGAAAACATACATATTAGAAGTAAATGTTACAGTTCTATCCACGTGATACTTTATAATTATCAGGACCAGAATAGATTTAATTTATTCTTATGTGCTAAAAATTATATCAATTTCAATAGGCCTTTTTTGAAAAAGTCCATTTATTATGAAGATCGACCAGATGATCTCATACGATATAATTTTTTGCTGTAATTGAGA…	1214	0	96.6	1211
Hypothetical Protein LOC100123113	GL277768.1	1	3069677 to 3068994	TGTTGTAAAAAATTGAATGCATATATTCTTTGAATCTTTTCCTTTCTAACTGTTCTTTCACAATAATATTCACCGACGCACGGCTCTTTGATTCATAAAAATCTATCGCACAACGTGCACAATGATTAAAGGATATGTCGTTGAGAGTCAATGATATAATATAGTGATGTTATATTATAGTATAGTTGAGAAAACGTGAACAATGGTCAAGCAGAGCGCACCGTCAAATAAACTTTTTTTCTGACTCCATGACTAAACAGAGTATTTCTGTTAAATATTATTAAAAATATATATATTTATATTTTATATATATATATATATATATATATATATTTATATATATATATATATATATATCGCGATTTCAGGCTGGCTCGTACTATAGTCTCTGCGCGATTC…	710			1729
Hypothetical protein LOC100123221	GL276749.1	7	3000050 to 2999124	ATGCCGTCAGAAGTAGGCACTGAAGACATGGTGTCTAAACAGGATGACGGAACTGCTGGAGAATCTCAAGCTGAGACAGAGATCACATTGCTGGATAACACCAGGCAGGAGGAAAGCAATGGTTGTTCCCAGGATGCAGAGAACGAGGAGACAACTACCAGGAATGACAACTATGCCTACAACAATGCTGCTGAGGCAAGAAATCTGGACAACGCACTGCTGTCTGTGACTCGAGAAGCTGTCATTATGGAGAACGGTTCAAGTAGCTGTGAGAGTGGAGTGGACAGAATAAGAATAATGGAGAACGATGCTGAGAACAATCTCACGGAGCAAGTGAGTTGTGAAGCTGAAACTCAACATAATGGTTCGAATGACATAGAAGTGTTGGGTGCAGTCAGC…	927	0	98.2	3618
Ikk gamma Kenny	GL276173.1	6	80447 to 83410	ATGTCAGGTTTTGACATAATGACAGATTCTGCATTTAGCGATGGATTACAGTGGAGCTTAGTTCCCAACNNGAATCCAAATGTTGCTACAGAAAATCATTTACAGAGTTTGGGTTTGAATGTTCAAGACGGCTTGCCCAAATTTAAACTGAATGAAGTTGGTCCTGTAGCTCTTGCTAGTTCCATCTTCCAGCAGAATAACATCAACGTCAATGATGATTCGGAGCAGTCCTTTGTTGTACTGGGTGAAACATCATTGCAATCAATTAGAGATGATGCACTGGCTAGTTATATGGAAATCCAACAGAAAAGTCAATTGACTGTAAGTTTGTGCTAAAAAACATTGCTATTCCNNNNNNNNTTAATTATTATGTATATTCATTAATTTCGCAGGATCATA…	2967	0	97.3	7284
IKK-like protein	GL277921.1	31	445634 to 446054	AGACTATCAGTATATTTTTTGTTTCATTGTACCGAATGGTTCAATATACTGTATATAGTAATAGTACCTTTGGTGAATTACAACTATGGATTGAACAACAAACTCGAATTCCTATCAATAGACAAGTCATAGCTGATACAGCTGGATTGGTGTTTAATAGAAATCAAAATTATGAAAGTATTAACTTGTCATCTATTCCTCAAACAATGTTATATGTGTATGATCACTGTAATTTAGTACTAACAGAAGAGGTATTATCAGATGGTCCTAAAATTCCTGAAATACTTGACACAATGGTATGTGAACCAACTGCAATCAAGGATCGTCCTTTGCTAAAACAATGTTATACTGCACTTATTTACATTATGAGATATGAAGTGACGTTATTTAAGCAATATA…	421	0	98.3	2679
Imaginal disc growth factor	GL276245.1	237	140805 to 141480	CTTTCGGCTGAAGAGAAGGCTGTTAAGATGAAGCTGCTAATTTCGACGGCAGTAGTCGTTGTGCTACTTGTTTGCGTCAACTCTGCTTTTGGTGTAGATCCACATGAGCATAGCAAAGTAGTTTGCTACTGGAACGCTACGTCCTTTGAACGTGCTGGCCCCGGCAAGTTCCAAGTGGACGACCTTCGACCAGCTCTCTCGCTGTGTACGCACCTCATCTATGGATTTGCCGGGATCAACGCTGCCAATTTCGAGGTCGTGCCGCTAAACCCAAATCTTGATACCGGTGCCGGCTATGGTTTCTATCGTCTAGTCACCCAGCTGAAACGTCAGTTCCCTGAACTCAAGGTTTACCTCAGCATTGGTGGTAACGCTGATCCCTATGAGGAAACTCACAAG…	1555			1567
Immune deficency	GL276289.1	17	1517244 to 1518014	TTAAGCTTCAATATTATGAGCAATTGCTAGTTTTTCAACACATTCATATTCCATTGACTTCCACATAGCTTCAACCAGCTGTCCAATAGTTGCGTCTTGGGTATGTGCATTCTTCCAGGCTACCAAAAGTTTGTATATAACTTCACCGATGCCTCCTTTGTGCTTGTAATCTTCTATAAATTGATCTATTTCACCCTTGGAAAATCCAATTTTTTTAGCAACTTTTTTCCAGCCATTGCCAAGATGCGTTTTTATCAACAGCATATCTTCTATTGTGACTACCTGTTTGCTTTCACTAAAAGCCTGTATATGTGGCAACATTTGTCTCGGTTCTTCTTTGTCCTGTTCTTTAGCTCTATTAAATGCTGAAGGATCAAAATTCTGAAAGTTATTCAAGTT…	771	0	98.3	771
Inhibitor of Apoptosis 1 protein	GL276859.1	18	2243833 to 2243101	AGACTGCAAAGCTTTGAGAACTGGCCGTCAGAACATGTGCGGCCAGCGGACCTGGCAGCTGCAGGCTTCTACTTCACCAAGCAGATAGACCGAGTGCGTTGTTTCGAATGCTCAACAGAGATCTGCCGCTGGGAACAGGGAGACGATCCTATGGTCGAGCACCAACGCTGGGGCGGTCGATGCCGTTTTATCAGGAAATTGCCTTGCGGTAACGTGCCCATCGGTGCCGATCCAAGCATGATCCCTGCTCCCCGTCCACGAAGTCGTGACGTTTGCGGACCGTACAAGCTGGATTATAGACTAGGAGCCGAGGCCGACACCCATGCCTCGTGTAGTGGAACCAGACAGGGCAGGCAAGCAATGAGCGAAGAACCGCCGAAGCAGCCTTCAGCTGCCAGG…	733	0	98.5	1086
Inhibitor of Apoptosis 2 protein	GL276859.1	18	2267962 TO 2267499	GAAGTGAATAGACTGCGGACCTTCCTGAACTGGCCAGCCAATTGTCCTGTCAGTACGGGAAGAATTGCCAAGGCAGGCTTTTACTACACTGGAACGGCACAAATAGCCCAATGTTTTTTGTGCAGCACTAGAGTTTCTGAATGGAACTTTGGTGATCAGGCAATGGCTCTTCATCGAATAGCCAATCCAGAGTGTCCATTTGTTTTGGATCCTATTGCTACTTGCAATGTGCCGCTGATTCTCATGGCTGATGAATCAATAAATCCTAATTCCATAGATAATAATCATAATGAAAATAGCGAATCAAGTGAGGGAGGCGTGACACAATTAGAGAATGCTATAACAGATCTCACAAGGTATTCTCACAGATTGAACACATTCAGAAACTGGCCCATCCCT…	464	0	98.3	1809
IP15264p	GL275162.1	4	3768053 TO 3768421	AGTGTCCCTTCGCCAAGTGGGGCAAGGACTGCCAGGAGTCCTGCCAGTGCGAGAACGGCGCCAGCTGCGATCCCTACGACGGCAAGTGCACGTGCTCGCGAGGCTGGACGGGCGAGTTTTGCAACGAGCGATGCCCGGCCAACAGGTATGGCCAGAATTGCGCGGAAGAGTGTCGCTGTCTCAACGGCGGCAGCTGTCATCACATATCCGGTGAATGTCACTGCGCTCCCGGTTACACCGGCCCGCTGTGCGGCGAGCTCTGCCCCGCCGGCAAGCACGGGGACGATTGCAAATCCGAGTGTCGATGTCAGAACGAAGGATCTTGCAGCCCGACGACCGGCGAATGCTTCTGTACTCCGGGATGGACGG	369		98.9	3126
Jagged 2 Protein	GL275946.1	26	682908 TO 681189	AGACGTGGMYGWGTGCAWGRANNNNNKTCRCCNNGTGCNNNNNNNACGGCMMCTGCNNNNNNRRCGTCKCRGRNNNCRMSTGCAWKTGCCGSMACGGCTGGMRMGGCRAGMYYTGCGMSCNNNNNNNAGKKCACYSYSWACCCGGGNNYTGCMRRCATGGYNNTACTNNNNNNNNNNNNNGCRACGGCTYSASSTGKCASTGTNNNNNNNNNNNNNNNNNNNNNNNNNNNNNNNNNNNNNNNNNNNNNNNNNNNNNNNNNNNNNNNNNNNNNNNNNNNAYCTGCGWCAMCARCKSGGRCGGYRNNNNNNNNNNNNNNNNNNNNNNNNNNNNNNNNNNNNNNNNNNNNNNNNNNNNNNNNNNNNNNNNNNNNNNNNNNNNNNNNNNNNNNNNNNNNNNNN…	1727	0	98.3	3303
Lachesin	GL277752.1	21	1616116 TO 1615728	AAAGACAGATTTTCCGTAGACCATTACAGAGACACGGCCACCTATAGCCTACGCATCCGACGTCTGGAAGCGAACGACACTGGCTTCTACCAATGCCGAATCGCCGTGGACGCCAATAACAAAGTATCTGCGGAAGTGAAGCTCGATATAGAACGTCCTCCCGGAAATAACCGCCAAGTCTTCGAGCTCTGTGACTGTAGTCGAAGGCGACTCCCGCGGAGTTAAAATGCGAAGCCGATGGCTTTCCATCTCCCAGCATCACTTGGAAACGAGAAAACGACGAGATCCTGCCGTTCGGAAATACTTGGACCAGTGGCAACGTACTGAGAATACAAAGCGTCGATAAATCCGACCGAGGCAACTACTACTGCATCGCGAACAACACGATAGAGCCATCGG…	775	0	98.2	1144
late trypsin	GL274178.1	2	1489200 to 1490396	AGTTTAACATCTTATTCGTAGTCGATTNCCAGTGACTCTCTTAATCCACGTGGTGTAAGCAGAAACTCTAGTGAACACAGAAGGTCTACTACTGGGACAACCAGCGTCCCCGTAACTCACGATGCCGACCTGCAGCGGCTCGTCGTCCGCTTCCAATACGACCAGAGGACCGCCGCTGTCACCCTGGCATACGTCCTGACCAGTCGACGAGTCAGTGCAGACGTGGGTATAATCGACGCTCCAAGTTCTGCGGCACATACCGTTGGATATGATCGGCACCCGACCGTACTTTAGCTTCGAAATTGCTCGGCCGTCTTGTTCATCCTTACCCCAGCCATAAACGTGGCCCATCTGGCTCGCGAAAGACTGGCGCTGGTATGATTTGCCGGCAAGGCGGAT…	1198			1203
LD23562p (LOC100116623)	GL275827.1	136	77046 to 78675	GTTAAAAAGAAATTGAGAGATTTGACGGTAGATTACGCTAGAGGCGAAGGAGTTTTGATCTCCGACAGCTCATCGGATGAAGAAAGTTCTGAATATGATGACAACGACGATGATGAAGAGGAAATTGAGCACAACTGGGGAGAATTAGACAAGCAAGCGCCAACAACTGACGAAATCACCCGTAGACTAGCTGCGTGTAACATGGATTGGGATAGAATCAGAGCTACCGATCTTATGGTGCTTTTCAATTCATTCCTGCCTACCGGAGGATTAATCCATAGTGTGACAATATATCCATCAGATTTTGGATTGCAGAGAATGAAAGAGGAAGAAGTTAAAGGACCTATTGAATTAGTAGAGCCCAAACAAGAGGTCAGTGACGAAGATGAAGAGAAGCAG…	1630	0	98.4	5034
LD37787p (LOC100121765)	GL276173.1	6	1770072 to 1879860	CAGGTCACGAGAAGTGCACGTTCCATCACGACATGGAACTGGACCATAGGCCACCGACGCGCGAGGCTCTGCTGCCCCAGATGTCCCACAGCTACAAGCTCCTGTTGCAGGCGCTCGGCGAGAACACCGAGAGACAGGGTCTGCTCAAGACGCCCGAGAGGGCTGCCAAGGCTATGCTGTTCTTCACCAAGGGCTACGATCAGAGTCTCGAGG	213	2.08e-109	99.1	783
LD43328p	GL274178.1	2	1232441 to 1233842	GTGACGAACGGACCCACGACCTACAAGTGGGTGAGCACCGAGTCGTCGCCCAAACCGACGCTGGTCAAGATCAAGACGACCCGGCCCACAGCCGTCACGACGGAGTCCCTGCCTCCGTCCTACTACACCTCGAACACGGCCCCCAACCACTACTACTACAGCACCGCCACGACCGAACCGTCGAGGTTGACCAGCTACTACACGTCCCCGGGATCCTCCAGCTCCTTCTCAACCCAGGCGGGCAGTTACGACGGCAGCAGCAGTTACCCCTACTCTTCGAGGCCCACGACCAACCCACCGGCTCCTACCGTGATCGTCCTGGGACCTCTCGGCACCGAGTACACGACCATACCGACCCAGAGCACGCCCACCAGGTTCGGCGTCAACACCCAGAAGTAC…	1402	0	98.1	3462
Lectin 4 C-type lectin	GL277224.1	8	146579 to 147310	TTTAAGCGAGTCATCCAAAGTCCTCGATTGTCTCGTGCGAGCATGAAGATGATGCTGGTGCCGCTACTTATAGTGGCTTTGGCGGCGGTCGCAAGCGCCGAGGTCAGCCAGGCGCGACCCCACAGCAACCGGCCCGGAAGATTCCTCTCCCTGCCAGTGCCACAGAAGTGCGCCAACAGGCCCAAGGCGTTCCAGTTCAAGGGCCACAACTACTTCTACAGCGGCCACGTGCCCGCCCATGCGAACCAGAAAGTTGACTGGCTCGACGCCAGGAACATCTGCCGGGAGTACTGCATGGACCTCGTCTCCATGGAGACGCAGGAGGAGAACAACATGATCTTCAGGCTCATCCAGCAGAACGACGTGCCCTACATCTGGACGTCGGGACGGCTCTGTGAC…	1090	0	97.1	1078
LOC100037188 protein	GL277224.1	8	297341 to 196438	ATGTCTTTCAAGGACAATTTCAACGTCTTCGTAGGCGGCAAGTCGGGCATATTCAAAGGAGTCCGAGTTAAAGAGAAATCATGTGTTATGAAAAACATACAGAATTTGGTATCCATCACCGATGACCACGAAGTGTCCTGCATGACTTGGGGCGACGACGACGAGAAAGAAATCCTCATAGGCTGTGGATCTAAAGGAGTCAGGAGTGTGAAAACCTACGACACAGAGAATCACTCGTTTAAGACGTCATTCGTCTGTGAACTTGGCGAAGGAAACATCACTGGAATAGCCAGGTATAACGGGAACATTTTGACAGCAGTACAGTCTGGTCAGATAAAGCTGTGGAGACAGAAGGAGAAGGAAGAGTTTTTGCTGAATGCTGGAGAAAATTTGCTCCGT…	904	0	99.1	1032
Lozenge	GL274092.1	112	486763 to 487257	GTGCTTCCGTCGGACGGCCAGCAAAACGCCTACACACCGAACTGCGTGTCGATGTATCCGAGCGGCGCAGCCTCGTCAACGACCTCCTCCCTCGCGTTAATCCAGAATCCAAGCAGCGTCAAACCCTTGGTAGACACCAGTTCGGACATGTACGCCACAGCGACGGGCAGCCCAGGCTCGACCGGTTACCATCACTACGGCGGCTGGACGACGGCACCCGGACCCGCTACCCCCGTACCTGCCCCAGCAAATTACAATCCGAACTATCAGGGCTACTATCATCAAAATCCCGCGGCGCAGAACTACATCGGTCAGGCGCCGATGGTTCTCTATCCCCAGGTGTTCACCAGTACCATCAACCAGAACCAGATCCACCTGCATCTCAGCGAAGAGACGCTG…	495	0	98.8	1800
LP12305p (LOC100114326)	GL275265.1	115	171497 to 171973	GTAAATTTCGCAAGAAGCGCCAGCCAAAACTGGAGGACTTCCAGCTGGACAAAGACGACTTGACGCACCAGGCGTCTCCGATCTGGACTCGCGACTCTCGCGAGGACGATCCGAATCTCGAGGAGATGTCCGACGCGGACTACTTTGGCGAGTACATCGACGAGGCTCCGGTCGAGCCTCCGAAGAAGAAACGCGTCTACCCGACCTTCCTCACCTACTCGGATCTCGTGCGTCTGAAGCGCGACATCGAGGAGGACGAGGACGACGTCGAGTCCGACGACGACTATGAGGTCTACGACGAGGAGGACGAGGAGGAGGCTCGCCGTCGCAGAAGACGACGAAAGAAGCGCGACGCGATGGAGGAGGACGAGCAACGGCCCAGATGCAACTCCGACATCA…	477	0	97.5	3807
LysozymeP| putative	GL274178.1	2	2744294 to 2743604	CCGCCACCGTTGCTGCAGCCGCTGCTACTTGCGCATCCGCGACGATGGCCAGGCACACGACTTTGCTGCTGCTGCTGTCGGCTCTGTCCGCCCTTCTCCTCCAGGCCGATGCCCGGATCCTCGCGCAATGCGACGCGGCCAAGGAGCTGGCGCGTGCCGGCATCGAGCGCACCTTCATCAGCAACTACGTCTGCGTGATGAAGAGTGAGAGCAACTTCGACACGTCGAAGAAAACCGGCCCGGGCCACAAGGCCAGCTACTCCTACGGCATCTTCCAGATCAGCAGTGACAAGTGGTGCAGCGCCTTCAGACCCGGCGGCGTCTGCAACAAGAACTGCAACGACTTCCTGGACGACGACATCCGGGACGACATCGCCTGCGCGAGGACCATCTTCAAGC…	734	0	97	736
Masquerade	GL277306.1	29	237555 to 2380222	CTAAAAACTGCACTAGCTATTCTGGCATCTGCATGGCTGAGCGCATCGCGGCCTACTGCGACGGCTGGCTGAACATCGACAGCCTCTGCAAGCCGAGCTACCGCTGCTGCGTTTCCCGGGACCACTTCGGCGATTCTCCACCACCCGAACTACTCGTCATCGACCGCACCAAGTCGAACCTGACTCGCGTCGAAGAGACGAGCACCGCCGCGCATCCGTCCACCTCGTCGTCCACCAGCGTGACGATGCTCAGCGCTAGACCGGTCTCGACGAGCAGCTCGACTTCGGTCGCGACGACGACGTCCACGACCCCGAGGCCCAGGATAACAACGACCGAGGCTCCTAGGCAACCATGCAAGGGCGAATGCGGCAATGCAATCTTTACCCTCATCTCCTGCG…	468	0	99.1	2328
mCG14932	GL277768.1	1	336149 to 337910	GAATTTTACAAGAGCTTGACCAACGACTGGGAGGACCATCTTGCTGTCAAACACTTCTCGGTTGAGGGTCAGCTTGAGTTCCGGGCCCTCCTCTTCGTTCCTCGTCGGGCACCCTTCGATCTCTTTGAGAACAAGAAGAAGAAGAATAACATCAAGTTGTACGTGAGGAGGGTATTCATCATGGACAACTGCGAGGACCTCATCCCAGAGTACCTTAACTTCATCCGAGGTGTGGTGGACAGCGAAGATCTTCCATTGAACATCTCTCGTGAAATGCTCCAGCAGAACAAGATTCTCAAAGTCATCAGGAAGAATCTTGTAAAGAAATGCTTGGAACTCTTCGAGGAGCTCGCCGAAGACAAGGAGAACTACAAGAAGTGTTACGAGCAGTTCAGCAAG…	1762			2447
Methionine aminopeptidase	GL274622.1	3	781073 to 781334	GTATTCTTGAATGGACATCATGGAGATTGTTCTGAAATGTTTGAAGTTGGAAAAGTAGATGAAGAGGGCAAAAAGTTAATTGAAGCAACAGAAGTCTGCCTGCAAAAAGCTATTTCTATTTGTAAACCAAATGAAAAATTTTGTAATATAGGCAAAGTTATAGAAGAAACTGCTGGAAAGCAGGGATTTACTGTATTACCAGCATTTGGTGGTCATGGTATTGGTTCATACTTTCATGGACCTCCAGACATCATTCATATTG	262	1.12e-137	99.2	966
MIB like	GL276600.1	47	1247009 to 1246505	GGATTCTATTGACGAGTAGAGAAAATTGTACAAAAATACCTTTGAAGGGAATTTTTAAGGGAGCCAAAGTTATTAGAGGACCTGACTGGGAATGGGGTAATCAGGATGGCGGTAGAGGAAAGACTGGAATAGTACATGACGTTCGCGGCTGGGATAATGAAAGCAGCCGATCTGTAGCCACTGTGACTTGGTCCTCTGGAAGCACCAATGTCTACAGACTGGGCTACAAAGGATGCGTGGACCTGTGTTGCGTTCAAGCAGTCAGTGCTGGCTGGTCTTACTACAAAGAACACCTTCCTGTTTTGGGGCAAGTGTCTGCAATTATACCACCAAACGAAAACGTATCTTCAAATGCTGTAAATATATCAAATCCTCCCAGTCCTAGTCATATAGTTTTTA…	505	0	98.4	3006
Microsomal Glutathione transferase (GSTMIC1)	GL275817.1	126	327784 to 327190	GCGCGATTGATAGGTACCGTTTATTACCGGCGTAGCCACGACGCAGCTCAGACTGTCCAACGCTTCTATTTTGCAACAGAGAGTTTAGAGTGACGCCGTAGCCATGGTTGTGCAGAATGAGGAGATCGTAAGAATCTTTGGATTCTGGACCGGCGTGCTGACCCTCAAGCTGCTCGCCATGTCGATTCTCACCGCCAGGATGAGGTTTAAGAAGAAGGTGTTTGCCAACCACGAGGACGCAAAGATGCTGCCAAAGGCCCGTGTGGCCTATGACGATGAGGATGTAGAGCGAGTTCGAAGATCCCACCTCAACGACTTGGAGAACATACTTCCCTGGGTAGCTATCACCTATGTCTATCTGGGAACCAATCCATCCACCTTCCTAGCTGGTCTGCTGAT…	820	0	98.2	821
Mitogen Activated Protein Kinase Kinase 7	GL277133.1	19	1555531 to 1556930	ATGGCGAATTCTTCGTTTATGCAACGATTTGTTGAAGAAATCGACTATGAAGAAATCGAGACTGAAGAAATTGTGGGAAAAGGTTCTTTTGGAGTTGTTTGGAAGGGAAAATGGAAAGGTCAATCCGTGGCGATAAAGCATATAAATTCGGAAGGTGAAAAAAAAGCATTTGCCGTAGAAGTGCGTCAATTGTCTAGAGTTGTTCATTCCAATATAGTTAAACTTTATGGAGCTTGTACGAAAAATCCCGTTTGCCTCGTAATGGAGTACGCAGAGGGCGGATCTCTTTACAATGTCTTACATTCAAATTTACAACTATCATACACGGCAGGGCATGCCATTAGTTGGACACTTCAATGTGCTAGAGGTGTCGCCTACCTGCATAATATGCAGCCGAAG…	1602	0	98.8	1602
Mitogen activated protein kinase kinase 7	GL275593.1	5	188460 to 189138	AGGGTCCCGACGTCATCGATTACATCATCCACCATCAGCACATCGACATCTCAGCGGCCTTCTGGCCACGTCTCCCTCAAGCAAACCGCTCACCTGCGCAGTCAGAGCAGCGTCAACAGTCACGACGTGGCTGCATACCTGCGCAACAACACCAGCAGCACCAAAGAACCGACATCCCTCAACTCGTCCACCTCCTCGCGCAGCAACCTCGAGAACGGTGGTGGTTACATACCCTACAGCCCCTACGGTTTCCGTCGGAGGGACCTGATCTCGAGGCCGACTGGCTGCAATAGTCTACAGCGCTCGTACTCGCCCGGATACCGGCAGGACAACGGCTACAAGCCCGACGAAAGATCTTACTCGCCTTACAGAACCGGTGGCGGCGAGGCCGAAGCAACG…	679	0	99.4	2325
Mitogen Activated Protein Kinase Kinase 9	GL277306.1	29	771151 to 772467	TACCGGCTGACGGCGTTAAGGGTAAGACCTGGGGCCCCTCGACACTCCACCAGCGTGAGCGCGGCGCCATTATCTCGTCCGCCTGCTCGCCGAGCTCGCCCGCGGTTTGTCCGGGCATCGGCAGCGCCAACGCCACCGTCGTCGACGGCAAGCGCTGGTCGCGCTCCGCGCCCGATCTCGAAAAGGCGCCGCTCCGGACGGCCCTACTGGTCGCGGCCGCGGCCAGCACAGCAGCCGGACAGCACCCTCACCATCATCAGCAGCAGCACTGCACGCCACTGCTCCAGGAAATAGGTAACGTCCGCAAGAGCGACGCGAGAAAGCTTTACTCCTCGGCGAACGATCTCGTTGACGCACCGGCTACCGCGCCAGGCTCGGTCGACAGGCACGCAGACGACT…	1317	0	98.9	3588
Mn superoxide dismutase	GL276749.1	7	2041111 to 2041768	CCCAAGAAGCGATAKKTTGCAGCGAGGAGAGCGATCGTCAGCGGAGCTATCCGAGGCAAGGAGGCTCTTGTCAGGGCCAAGCACACGCTGCCAGACCTGCCTTATGATTACAGGGCTCTGGAGCCAATCATCTGTGCTGAGATTATGCAGCTTCATCACTCGAAGCATCATGCTACTTATGTAAATAATCTCAATGTGGCTGAGGAGAAGTTGAAGGAGGCCACTGCCAAGGGAGATGTAAACACTCAGATTGCACTGGCTCCAGCTATCAAGTTCAACGGAGGTGGTCACTTGAACCACTCTATCTTCTGGCAGAATCTTTCTCCCAATGGCGGCAAACCAGATGCTGCCCTTGTGAGCCAGATTGAGAAGGACTTTGGAAGCATGGAGGAAATGAAG…	1003	0	96.4	1109
MyD88	GL274178.1	2	1079489 to 1080032	AGACAAGAGACAAGAAAGAAAAATCATCCCATGTGTGTACAAAAATTGTGAGCTTCCACCTCAGTTAACCTACTATTCTAAAATTTATTACAAGAAGGTGTCACCTGATTTCTTTTGGGATAAACTCACTCGATCTATGAAAGCAATACAAAGTGTTCAAAATGCTCAAATGTTTACTCAAAATTCAAGCGATTCTAAGGCGAAAAGCAGTAACTCAACAAAGAATACTCCAGTTCAAGAGCCCAAAAAGAAAGTAGAAAAAAATCCACCTGTTGAAACATCAAAAGCTGTGAGTGGTCTGAAAAACCGTGTGTTGTTTCCTTGGAAAAGAAGAGAAAATGCAGAGTTAAGTGAAAAGCCTAATAAAAAAGGTGAGAAACTTGTAACGCAAGACCCTAT…	544	0	98.7	1254
Neither inactivation nor after potential D| putative	GL276749.1	7	210764 to 210472	GAACACGCGGTGCAACAGCATCCGGGGAGCGACGGAGGCCACGGTGTTCCCCAGCAAGATGGACGAGCACGCGGTGTTCCGAGTATTCCGGAAGGCCTTCTGTCGGCCGATACCGATCGTCTTCGAGAAGAGACTGGACTTGCACGGACTGCCGGCCTTCCAGTACACGATACCCGAGAACTTTGCCGATCCGCCGGAGCTGAACCCCGAGAACGAGTGCTTCTGCCGAGAGAAGNGANNGGAGAAGGAGTGCCTCAAGCGGGGCCTGCTCGACCTCACGCCCTGCTACTACA	293	0	95.9	1569
NFAT| putative	GL274349.1	133	53487 to 52903	CCGTGCTTCCAGCAGCTGCGGGATCAGCAAGTTTTCTGGGGGCCATTCAGCCCGCCGCATCCGCCACAGTTCCGGCCGTTAGTCCAGAAGTTCTGAAGAGCGACCCCAGTCCTCCGCCGGTGACAGCCGCGTCGCCCGTTACCCCGGTGATGTTGTGGAGCTCGCAGTCCAGTAACCAAGGCGCTTCCGCCGATGTGATGATGCCACCTCCAACCAATATGGTGACCAACCCCATGATGACGAGGAGATCGTCCTCGAGCTTGCAGCTCATCCTGCCCGACAATCTCAAGACCGAAGTTCTCGACGAGAACAGTTCGAGCAGTCTCATGGGCGACAACAGCATGTCGGGCATGCCTACCTCGACGCACAATCCCACCGCTGTAACCAGTCCGCTAGAAC…	585	0	98.8	4119
Nitric oxide synthase	GL275395.1	235	24812 to 24615	AGCTCATGAATGTTACAATCGTTGACCACCATACGGCATCTGAGTCATTTATGAAACATTATGAAAATGAAATGAGGTTACGAAATGGGTGCCCAGCTGATTGGATTTGGATTATACCTCCGATTTCTGGGTCAACAACTTCAGTCTTTCATCAAGAAATGGCTTTATATTACTTAAAACCATCGTACGACATGCAGG	198	1.95e-100	99	1509
Nos|nanos-like	GL277800.1	161	309579 to 311190	ACTGCTTATTACGTAGACTTTGCTTTTTTATCTTCTGAAATAATTTAGAGGTTGGGTATTCTTGTCAATAGAGCAAGAGCCACTGCTGTACTTCGGTATTAACTAGTATTTTCTAAAAAAATACAGCCTCAATATTACAAAGTCACTTTGGGTTTGCGACGCATCCTAAAAAGCGCATATTTTTTAAAATGTATCGGCTCCCATTATATCAGCCTTGAACTTGAGCGTGCGCAGCCCAACCAAGCTGCAATCGAGAATGCGAGAAACTGTTTAGCTGAGTCGAAGTAGTGCGGCGATGACGTCGCGTATGTTTACATTTCGGGTGCCTATCGCGCAAGAACAAGGGCAGCGCCGGCCGAGGATCGAAAACTGTTACGCTCAATCCGGCTTTCTGTACCG…	1612	0	96.1	3132
Notch	GL277133.1	19	576411 to 574621	CCCGATCTACGATGCCTACTGTCGCAAGCACTACGCCAACGGACACTGTGATTACGGCTGCAACAACGCGGAATGTAACTGGGACGGTCTCGACTGTGAACGCGAGCCACCATCTCTCGCCGAGGGCGTCATCTCCGTGGTGGTACGCATGGATATGCAAACCTTCCGCGCGAACGTTGTCGGCTTCTTGCGAGACATGGGTCACGAACTGCGCACCACTCTCAGAATCAAACAGGACGAGCTCGGCCAAGACATGATCTTCCCTTGGAAGAGGGACCGGGAGCCTCCTATTCAAACCAACTTCTTTGGCAGCCCCACCAGCATCTACACGGACAAACAGACCGGTATCGTCGCCTACCTGGAGATCGACAACCGCAAGTGTACGATGACTCAGGGCTC…	1791	0	99.2	7428
Ovarian Serine Protease	GL275748.1	475	44333 to 51391	TCATTGAGTTCGAGGACAGTTTCGTTCGTCGCTGCCGTCGCTGCACTCAAGAAACCCATTGCAGAGTCGTGATTTGGGAAGACACTCTCCGAGCGGACATCGATGGCCTTTGCAGCTGGTAACTGTCGAGGGTATGTCGGTGCGCGACGTTACTCTCTCGATCCAGTCCAGATAGTAATGCACCTTCGTGTAGACACCCGGTCGACCTTTCCTGCCACAACCGTGTCCGTTCGACGTTATACCTGGAATTAATGGATATTTTTATTATTTTTAGGAAAATTTGAGAAACAATGAAATTTTTTGTAAAATTGTATACCATTGAGGGTGTATTTATTATCGGATTCGAAGCAGACAAGCGGACCACCACTGTCGCCGAGACAGGCGTCTTTTCCACCCTCT…	7059			17825
Oviductiin	GL275162.1	4	682796 TO 685017	TGAAAACGTTTTATTATTAAAAGAGTTACATAAAATAATGACGATGGAATCATTACTATAATATCCGAGTATAGACGTGAGAATGAAACTTGATTTTTCTTCTGTCAGCGCGCATTATCTTACAACATATCTAAACGTCGATAGCTGCTAATCGTTTTATCTAGTCGAAAGAAATTTCAAACACTTGCTAACCTTATTTTTATATGCGAGAGCGTACTTATAATTTAAACACGAAGGGTTGTAAATTTTATCAAATAATTTGGCGAGTTCCTCGTTTTTTTTTTCATCCGCGTCAATAGCAGCAAAAAAAAACGTCGCGTCTACAAACTACTTAAAAAATACAAAGCGTTCAGAGATCTGGTCATCCTTACGATCCGAGAGCGTAGAGTTCGTTTCCCT…	2222	0	95.5	3065
Oviductin	GL276459.1	27	507984 TO 507550	GGTTCGCCGACAACCAAGTCTACCGCATCAAGTCGATGAAAGTTCACGAGCAGTACGACAGGCACAGCTTCAACAACGACATCGCCATAATCGAACTCGACCGAGAAGTGCCTCTCGACTCGGCCGTGAAAACCGTCTGCCTGCCCGATGCGGCCACCTTCAACTACGTCGGAAGGACAGCCGTGGCCATCGGCTGGGGCAGGATCGGCGAGGGCGAACCGGTGAGCGAGGAGCTGCGCAAAGTCGACCTTCCCATCATGAGCCGGGACGAGTGCGAGCTGTCCGAGTACCCGAAAAACCGCGTCACCGAGAACATGTTCTGCGCCGGGTACCTCGACGGCGAGCGCGACTCCTGCAACGGAGACAGCGGCGGCCCTCTGCAGGTCCGCGGCGCCAAGG…	851	0	97.9	1089
Oxidase/Peroxidase	GL277538.1	9	4417577 to 4419530	AGATCAATTGCGAGAACTGAGAAAGGCATCGCTCGCTCGCGTGATCTGCGACACGTCTCACGGTATCACTGAAATACAAGCTCGCGTTATGCAATCCGTGGGTCCGAACAATCCGATCGTTTCCTGTGATGATATCCCCAATCCTTCCATCGATGCATGGAAAACGGATGTACCCTTGCTTACCTTGTCGGCGTATCCAGTTCCGGCAGAAGACTGGCTTCGATTCAAAAACGAGGTCAATCAAACCATAATCGACATAGTTTCCAATATCATGGCCAAGAAACCACCTCCGGGAAGCTTGCCGACGGACTGGTTGGCCTTCCAGAACGATATCAACATGACGTTTATGGATCTGAAGAATAAATTCTCTGCACTGCACCCGAAGGTAGTGACGAATGT…	1954	0	97.5	4674
Oxidase/Peroxidase	GL276289.1	17	1719904 to 1719419	GCGACCAGTGGTTCGACAAGGAGATAACCAACTACCTCTTCAGAAACCACCACAGACTGGGAGACGATCTGCGCGCCATCGACGTGCAGAGGAACCGTGACCACGGCCTCGCCGCCTACAACGAGTACCGAGTGCTCGCCGGCTACCCTCGCGCCGTCCAGTGGACCGACTTCGGAGATCTCATCTCCGCCGAGAATATTCAAAAGCTGGCTCAGCTGTACGAGCGCCCCGACGACGTGGACCTGACAGTGGGAGCCTCTCTGGAGCGTCACGTCGAGGACACCCTCGTCGGACCGACCTTCCTCAACATCCTGTCCGAGCAGTTCTGGAGGACGAGAGTCGGCGACCGATACTGGTACGAGACCGGAGACCCCGAGATCGCCTTTACCATCGAGCAAC…	1056	0	92.3	2811
PASG	GL277224.1	8	729268 to 728245	AGAGGATTTTGATGCTGGTCCTTCAAGTTATGACGAGATAGAGCCAAATTTATATTTGGGAAATTTAACAGCTGCTACAGATATAGACTGGCTAAAACAGATAAAGATCACTCATATTCTCACTGTGGACTCCTGCCCATTGCCTAGAAAAATACAAGATGCTTTACCTGACATAAAGTTAAAGTACATGCAGTTAACAGATATGCCCAGAGAGGATCTATTGACTTCCTTCGGAGATTCTAATCAGTTTATTGATAGTGCACTGGAGTCGGGTGGTAAGATACTGGTGCATTGTTACTTTGGAGTGTCACGCTCTGCAACCATTGTTATCGCTTACCTTATGAAAAAGTACAGTTTACCTTTTTCAAATGCTTTTGAGGCTGTGAAAGAAAAACGTCG…	1024	0	98.8	3582
Pelle associated protein| Pellino	GL275079.1	34	1188629 to 1188298	ACAAAGCACGATTTAGAAGAGCTAGTGGATGCCATAAACGCTGGTAGACCGCAGTGTCCTGTTGGCTTGAACACGCTGGTCATACCTCGAAAAGCTGCGTCAGAGTCGGCTCAGCAGCAGCCCTACGTCTATCTCAAGTGCGGTCATGTGCAAGGCCACCACGACTGGGGCCAAGAAAAAGACAAGGCTACGAGAAGATGTCCGATGTGCTTAGTCGCCGGACCTATCGTTAAACTTTGCATGGGAATTGAACCCGCATTTTATGTCGACAGTGGTCCACCGACATATGCATTTAGTCCGTGCGGGCATATGGCTACTGAAAAAACTGTAAA	332	2.54e-176	99.1	1305
Peroxidasin	GL276749.1	7	309182 to 310291	AAGATCATTGGCGCTCAGATGCAACTGATCACCTACCGCGACTGGATCCCCAAAGTTTTGGGCGGCAGCTCGGACCAGCTGTTCGGCCCGTACCGAGGCTACGACGGCAACCTCGACGCCGGCATCGCCAACGTCTTCGCCACTGCCGCTCTGCGTTTCGGACACTCCCTGATCCAACCGAAACTGGAGCGACTCGACCAAGACCTCCAGCCCATACCTCAAGGACCTTTACACTTAAGAGACGCCTTCTTCGCCCCTTGGAGGCTGGTCGACGAAGGTGGCACCGATCCTCTTCTCAGAGGCATGTTCGTCACTCCCGCGAAGCTCAAGAGACCCGAGCAGAACTTGAACATGGAACTGACGGAGCAGCTCTTCCGAACAGCTCACGCTGTGGCTCTG…	1126	0	98	3865
Peroxinectin	GL276289.1	17	1748678 to 1748324	AAGAAAACCCCGCTCTAAGCCCGGTAAACACGAACCTAGATCTGTTCGCAGGACTGCCGGTATGGGAACCGGGCCAATCGATGATCGTGGACACCGGAGCCTACGGTACCAAGAGACTGCCGCCCATCGACGACGCGAGTCTCAACGCCTCGGTCAAGTACGCGACCGGTGTCTTGTCGCGCATGGAGCGAATCGAGGCGAACCTGGTGAACGCTGGGGTAGCCCCTCCTGCCGATAGTCCGGCTCACAGTCAGTTCGTGCACTACTACCCCAACGACGCCGCCCTGGAGAAAGGACTCGAGGCTATGGTGGCCATCGGGGCGTCGGCGCAGTTGACCCAGTCGCATTGTATCAG	355	0	98.9	2415
Peroxiredoxin	GL275793.1	16	2898095 to 2898312	GTCTATTCCAAACGCATTATTAAAAAATCGGCGTGACTCGATATATCAAGATGAGGCTGAACTCCGTAGTACCGAACTTCGAGGCGGACTCGACTCAGGGCCCGATTAACCTTTACGACTGGCAGGGCGACTCCTGGGTCGTGCTGTTCTCGCATCCCGCGGATTTTACACCTGTGTGCACGACCGAGCTGGGAAGACTCGCTGTGCACAAGCCGCATTTCGAGAAGAGGAATACCAAGCTGCTGGCGCTTTCCGTCGATCAGCTCGACGATCACGTCGACTGGGTCAATGACATCAAGTCCTACTGCCGGGACATCCCCGGGGACTTCCCGTACCCGATCGTCGCGGACCCGGACCGCAGCTTAGCCGTCCAGCTGGGCATGATCGACGAGGAGGGCA…	797	4.48e-107	97.7	816
Peroxiredoxins| prx-1| prx-2| prx-3	GL274210.1	22	2138593 to 2138832	CCTCCTCACTGCACTTCAGCTCACGTCGCACAACGAGAGACTCTCTTTATAAAAGACATCATCAGAGCGTATGATGAGGTTCGCACAAGCGTT-GGGACTCCTAGTGCTGCTACTGGCGACATCCACCAGGGCAGCGAACAAGTTCGGCGAGGACGAGAGCTGTTACTCATTCGCCGGAGGCACCGTCTACCCCGGCAGCTCGAAGCACGAGGGTCACCAGCTCCAAACCACCAAGGCAGTCATTGGCAAAAAAGCCCCTTATTGGGAAGGAACAGCAGTGGTCAAGGGAGAATTCAAAGAGATTAAATTGACACAGTTTAAAGGAAAATATCTAGTCTTTTTCTTCTATCCCCTCGATTTTACGTTCGTCTGCCCAACGGAGATCTTGGCCTTCTCGG…	873	2.97e-123	98.8	869
PGRP	GL274995.1	93	412976 to 412702	ACTCGTATCGAAATTCAACGGTGGAAATCAACATAGAAAAAATACCAACGGAGGCAAGTTTGACAGCAGCTCGTGACCTCATCGAGTGCGGTAAAAGTCAAGGATATCTTCGGCAGAACGTAAAGGTCATCGGTGCTCGCCAAGTGACGAGTACGTTGAGTCCTGGTGATCAGCTCTACGCCCGCGTACGGACGTGGCCGGAATGGACTGCGATTGCTCAATGAAGAAGTTCATCATTTTTCTTTTATACATGAAAAGGCAAATAAAAGACTTGT	275	1.28e-136	97.5	770
PGRP 3	GL277030.1	58	617386 to 617909	ATCCAACAATATCTGGCGTGTGTTTTGTGACCCGAGTCGAATGGGGAGGCCGACCTGCTAACGTACCACCCGACAAGCTCATACAGCTGCCACCTCTCTACGTGATAATCATCCATACGGTGACAAGATTCTGTTACACTCAGGCACAATGTGCACCGATCGTCCAGGAAATCCAGGAACTACACATGGATAGTTTGTTATGGGACGATGTAGGCTACAACTTCATGATCGGCGGCGATGGTCTTGTTTATGAAGGTCGAGGCTGGGACTTTGAGGGAGCTCATACTAAAGGCTTCAACAACAGGAGTTTAAGCATTGCATTAATCGGCACTTTCACCAGAATGGAGCCAACAAAAGCACAGCTATACGCGACTCAGGAGTTGCTTGAGTACGGCGTGG…	524	0	98.7	1617
PGRP SC2	GL274950.1	14	302043 to 302209	TGCTGCTGGCTTCGGCTCCGGCGGCTCGAGGAAAGTCCCTGCCTGACAATTCCGTAAATGCTCCTGCCATAATAACGAGAGCGGAATGGGGCGCGAAGCAGCCGAAGGGCCCGCTGGCCCCGCTGGCCGTCGAGCCTCCGCCCTACGTGATCGTTCACCACGCCGCCTCCGACAGCTGCACGAGCAGAGCGATCTGCCAAGCCAGGCTTCGATCTTTCCAGGAGTATCACATGAATACGAAAAACTGGAGCGACATCGGCTACAACTTCCTCGTGGGCGAGGACGGCAACGTTTACGAAGGTCGAGGCTGGGGAAAAACCGGCGCCCACGCCAAAACTTACAACGACAGGAGCATCGGCATTTGCGTCGTCGGCAACTACGAGAATCGGAGCCCCAACA…	569	3.11e-67	93.4	660
PGRP-LC	GL277030.1	58	623798 to 624732	AATGTATGAGAAAAATTTTAAAATTCACTTAAAATAACGAAGCTTTAGGAGAGTAATGAAATGCGAATAAAAAGTAATATTCATATCAAACTCCGAAGCTACTAAATCATATCTCATGCTAAAAATAGAAAGGTCACTTGTTCGCAACCATTCAAGTTAAAATTCAGTTTGATGTTCAAAGCAACGACATCATACAAACAAACATTAAACCAACTTTAATGAAGATCACCTTTCACGATAACGACTCTTGAAAAATTCGATTTTCAGAAAACAACCAACCAAATATTGTGCCACGTTCGGAATGGGGTGCCTACAAGCCCAAGAGTCCCAACAACAAGCTCCAGACCCTACCGCCTCACTACGTAATAATCAGTCACACTGCCTCTACGGTATGCTTAA…	936	0	97.8	1113
PGRP-LC	GL277030.1	58	625361 to 626159	ATGGAATCTTTTACATCGTCGAGATTTTTTCTTGTTGGCCTGCTAGTTGCGATTAGCATCTTTGCCATTGGCTTTAATATTGTAACAGCGCAGCAGGAAAAATCAGGTACTTTTAAAACTTGCTTNNNNNNNNNNNNNNNNNNNNNAGAGCTTAAAAAATTGCTTGCGCAGAGTAATTAGAGTCGTTACCAATGTAAGAATGTAGATGTTCTTNNNNTATTTTAGTAGCTACTTCAACTCGTATGCCGATTGCGTGTATAACTTGAAATTTTGTTTTCAAGAATCGAACAAGCTAAAGTTTGTTACTCGAGCTGAGTGGGGCGCCCAGTCACCTGCCAAACCACCCAACGCCCTGGTTGTTTCTCCAGCTCCGTACGTCATTATCAGCCACACGGCCTC…	799	0	95.7	799
PGRP-LC	GL277030.1	58	626560 to 627419	ATGGAAATCCCGCCGTTACTGCGCTTCTTCTTTGTCATTGGACTTTTGTTAGGTGTTGTTTTGACTGCGCCTGATGAGCGTGAGCCAGTAGTAGGTAAGTGATGTGACATGTATCC-TTGCCTTAAACAAAGAAAAAAGACTTTTTTTATGAAGAATTGCATGATTCCTTACACATGCACCTTTTTTCTTTTTTTTTCTCCGTGCTGAATTCCTATTTCTCAACAGAGACATTGCCAAACAAAAGTTAATCAAAATACACCTACAATACTACTATCGCACTTTTCAAAAAATCCAACAAGACAAAAAGACAAAAAATTCCAGCCGGCAATGACTTCTCGAAGAAGCTCGAGACAGTCCGCATAATCAGCCGGTCTCAGTGGGGTGCCCAGCCGGCCACC…	861	0	98	859
PGRP-LC	GL277030.1	58	629530 to 630101	GTTAGATTAGAGTAAGTCGCCATAACTGCAGTAATAACCTATGGAAATTTTACAAATACAATATATTCTGAGCAGTGTCAAGAATCGAGTGGGGAGCTCAACCGCCGATGTGGGCACCTACACCTTTGCCTACCCAACCAACCCCCTACGTGATCATCAGCCACACAGCCACCGACTTCTGCAATACCAGAGCCAAATGCATCCGAATTGTTCGTATTGCTCAATCCATGCATATTGAATCCAACGGTTGGAACGACATAGCCTACAACTTTCTCGTCGGCGGCGATGGCAACATCTACGAGGGTCGCGGTTGGGACATTCAAGGATCTCACACCTTCTTTTACAATCACAAGAGCATTGGTATCTCTTTTATCGGGACCTTCACCAATGCAAAACCCA…	572	0	98.3	1099
Phopholipase d	GL276173.1	6	3057551 to 3057091	AGTTGGAAAAAGCTAAACAAAACGCGACGTATCCATTTCTACTACCAAAGTCATACAAGGACTGTAAAAACTACATGCCAAACATAGGCGTGAGCCAAATGCACAATGTTAAATGTCAAGTTTTGAGATCTGTCAGTTCTTGGTCCGCCGGCTATCTCGAGTCCGACACCGTAGAACAGAGTATTCACGAAGCCTACATTCAAGCGATCTCTAAAGCAGAGAGATACATCTACATTGAAAATCAATTCTTCATTACTCTATCAACGCTTGATAATTCAGTAGTCAGAAATCGTATTGGAGAGACTTTACTCAAGAGAATAATTCGGGCTCATCGAGAGGGCTCGGTGTTTCGCGTTTTTGTAGTCATGCCGCTATTGCCTGGTTTTGAGGGAGAAGTTG…	461	0	99.3	3393
Ppo	GL277224.1	8	2387626 to 2388047	TAGATACAACGCCGAACGCCTCTGCAACGGTCTCCAACGCGTTCAACCTTTCATAGATCTACGTTCACCGATCCCGGAAGCCTACTTCCCGAAGCTGGACCAGTTGGTTGCTGGACGTGCTTGGCCAGCTAGACCAACAAACATGACTCTTTCAGACATCAATAGATCAGCCGATAAATTGAGGTTCGACATCTCTGATCTCGAGCTTTACAGGAGTCGTATGTTAGAAGCTGTGCAAACTCGCAGAGTTCGTAACGCTCAGGGCGGTACTCAGATATTAGACGAGAACACAGGTATTGATATTCTTGGAAATATGATGGAGGCTAGTATTCTTAGCCCTGATCAAACCTTCTACGGTGATCTGCACAATTTGGGACACGTTGCTATCTCTTACATCCA…	422	0	98.8	2985
Ppo1	GL274307.1	42	1645277 to 1645898	ACTTACACGTGGCTTGGACTTCACACCTCGAGGCTCTATCCTGGCTCGTCTGCAGCATCTCAATCACGACGACTTCTCTTACAGCTTCGTCGTCAACAACAGCAACAACCAG---------------------------------------------------GAGGTCATGGGAACCGTACGAGTCTTCA------------------------------TCGCTCCCAAGTACGATGAGACTGGTCGCAACCTGAGC---------------------------TTCGATGATCAGAGGATGCTCATGATCGAGATGGACAAG----------------------TTCACCACCAGACTGAGGAGAGGC------CAGAACACGATCAACAGAAACT…	1011	0	98.4	2339
Ppo3	GL274307.1	42	1641652 to 1642073	CAGATACAACATCGAGCGGCTCTGCAACAACCTCCCCCGAGCTCGCCAGCTGATGAATCTTCGCGAGCCCATCCCCGAGGCCTACTTTCCAAAACTCGACTCGATGGTGGCCGGCAGAGCTTGGCCCGCCAGACCCGCGGGCTTCGTTCTCTCCGACGTCAACCGAGCCGCCGACGCGATGAGGTTCGACTTGTCCGACATCGAGCGCTACAGGGACAGGATAATGGAGGCGGTGCACACTAGGCAGGTGCGCAACGGTAAGGGTGGCGTCATCCAGCTCGACGAAGTCACGGGCATCGATATTCTGGGAAACATGATGGAAGCCAGCATTCTTAGTCCCGACCCAGCGTACTACGGCGACGTACACAACATGGGACACGTTGCTATATCCTTCGCTCA…	422	0	99.3	2238
Predicted Dual Oxidase	GL275593.1	5	4266408 to 4265946	AGGTGGTGAGCCTGCGCACGAAGTACATGGCCCTGGACATAATCGAGACGGAGCTGTTGCCTTCGGACGTGATAAAGATCAAGTTCTACCGGCCGCCGAATTTGAAATATCTGTCAGGCCAATGGGTGCGGCTAGCCTGCAGTGTCTTCCGTTCGAACGAATTCCACTCGTTCACGCTGACCTCGGCGCCGCACGAGAACTTCCTCTCCTGTCACATCAAGGCCCAGGGGCCCTGGACCTGGAAGCTGAGGAACTACTTCGATCCCTGCAATTACAATCCGGCCGAGCACCCGAAGATTAGGATCGAGGGGCCATTCGGCGGTGGGAACCAGGACTGGTACAAGTTCGAGGTGGCCGTGATGGTGGGCGGCGGTATCGGCGTCACACCCTACGCGTCTA…	463	0	99.4	4591
Prepro Ion transport like peptide	GL274595.1	43	132385 to 132510	CAAGCGCTCCTTCATGGACATCCAGTGCAAGGGCGTCTACGACAAGGCTCTGTTCGCGAGGCTCGATCGCATCTGCGAGGACTGCTACAATCTCTTCCGCGAGCCCCAGCTGCACACGCTCTGCAG	126	6.97e-63	100	357
Prophenol oxidase activating factor	GL277800.1	161	316948 to 317558	CCAAGTGCCAGTGCAGATACCGACGCCCGCCCCGAGCTTTCCGCCGTTCACGCTACCGGTCCCCGTGACCGCGGCGCCAGTGGTCACCCTCCCGCCGATAGTTATCGGCCAGAGCTGCGTCTGCATGCTGCTGACCGCCTGCAACATAGGCTACTTTCCGATCACGGCTGTCGGCAACATCGATCCCAGACTCATACTCGGACGTCAGGGCCAGCCGGTCGGCACCTGCTCCGCTCCGAACTCCATGTGCTGTCCGCTGGCCCAGGCTAACCCGGTCGTATCGCAGACGCAGAACGTGGCATCCAGCAACATCATCGCGGGCGACATCAAGAACCCAGCTACGGCGAACGCTTGCACGTGCATACCTGCGAACCAGTGCGCCGAAGGCAACGCGGTCAC…	611	0	96.1	2181
Protein kinase c| mu	GL275014.1	24	368115 to 368858	ATTCCGACTCGACAGAACCAGAAGAAAACATCACAGACATGTCACAACTTTATCAGATTTTCCCTGATGAAGTTTTAGGATCCGGTCAGTTTGGAATTGTATACGGTGGAGTTCATCGCAAAACTTCGAGAACGGTCGCCATAAAAGTCATTGACAAACTTCGCTTTCCAACCAAACAAGAAGCCCAGTTAAAAAACGAAGTAGCTATCTTGCAAAACCTTTCGCACCAGGGCGTTGTGAATCTAGAAAGAATGTTCGAAACCCCGGAAAGGATTTTTGTCGTTATGGAGAAGCTGAAGGGCGATATGCTGGAAATGATATTGAGCTCCGAGAAGGGACGACTCAGTGAAAGAATCACGAAATTTTTGATTACCCAAATTCTCGTTGCGCTGAAGCACC…	744	0	99.9	2916
Protein Serine/threonine kinase| putative| transcript variant 1	GL274505.1	23	1918099 to 1917682	GTACGACTAATACTCAGCTATGAAGACTACTCTCGCTCTCGCCCTGTGCGTCGCCTTCGCCGCTGTCTGCAGCGCCGAGGAGAAGTACACGACCAAGTTCGACAACGTCGACGTCGACCAGATCCTCCAGAATGAACGTCTGTTCAAGCCCTACGTCAACTGCCTGCTCAAGGACACCCAATGCACTCCTGACGGCAGGGAACTGAAACGTGTACTTCCCGACGCTCTGGTGACCAACTGCGAGAAGTGCAGCGAGAAGCAGAAGGCTGGCGCCGACAAAGTCATCACTTTCATTGCTAAGAACAAGCCCGATATCTGGGAACAGGTGTTGGCCAAGTACGACAAGGACAACGTCTACAGGACCAAGTACGCCGACGAGGCCAGGAAACGCGGAATCCC…	633	0	97.1	655
Protein-tyrosine phosphatase| non receptor type nt5	GL274622.1	3	5049024 to 5049370	GTATTGGAAGAAGGATTAGTAACTATTAGAATTACACCGGATGAACAGGGTCGGTTTGGTTTTAACGTAAAGGGTGGTTTGGATCTTGACATGCCAATATTGGTGTCTCGAGTAGCGCCGAATACACCCGCTGATCGTTGTTATCCAAAGCTGAATGAAGGCGATCAAGTAGTTTATATCAATGGAAGAGATGTTAATGGAATGTTGCACGAACATGTCGTAAATCTAATACGACAATCCCGAGATTCCGGTACTGGTGAACTCACGCTAACAGTGAGGCCTAACGCTTTGTACAATGCTCTGGCAGGTACAGAAGAACCATTGGAAGAAGAACCGCCTTACAGGTA	347	0	99.1	2595
Pur-alpha	GL274178.1	2	947750 to 947431	AGGTTAAGACTAACTTCAGGACGGCCATAACAGTGCCGGAAAAGTCTTGGGCCAAGTTCCGCGATGTGTTCGCCGACTACTGTGAAAAAATGAAGGAGGGAGGCAGCGGCCTTGCTGGTGGCATGGGCTCCGGTGTGGGCGGCATGCCCGGCATTGGTGGCAGTGGCAGCTCCCCGGGCGGCCCCACCAACGTCCTTGGCAACGACAACAAGGCCCAGGGGGTGGCGCAGGTATCGTCGCCGTCCGGCGCCTCGCAGCAGCAGCAGCAGCAGCAGCAGCCTAATCCCAATCCGAACCTAGACTCTCCTTTGATCAAGTGA	320	1.67e-169	99.1	975
Putative Zinc-dependent alcohol dehydrogenase	GL274622.1	3	1524406 to 1523826	GCCCAAGCAGCAGCAGCAGCAGCANCAACAGCAGCACCGAGCCCAAGATGAACAAGCTGTGCCGGCAGCTGTCGATCGAGTCGCCCTCGGTGGGCGGCCGGGAGTGCGTCTTCAGCTTCGACGTGCCGGTGCCGGAGGTGCCGACCCGGGGAGCCCGGATCCGAGTCGTCTGCGCCGGCGCCTGCTATCACCCGAAGCGTTCCGGCTCGCTGACGAGCCTCAACTCCGTCTCGAGCGGAAGCAGCCTCGCGACCGACGTCTCCGTCGAGGGTGACTTCCCCTCGATGCTGCCCCATCACGGCATGAGGGACGCCGCGCTGTTCCCCGGCTACGAGGTCGCCGGAGTCGTCGAGAGCCTCGGCTCAGAGATGACCGAGGACTGCGGCGTCAAGCTCGGTG…	581	0	98.1	1351
pxPhosphoserine phosphatase	GL275593.1	5	4136932 to 4136539	ATGGCGAACCTCGATGAGGTCAAGATGGTGTGGGGACTGGCTGACGCCGTCTGCTTCGATGTTGACTCGACGGTGATCCAAGAAGAGGGCATCGACGAGCTCGCTAAGTTCTGCGGAAAGGGCGAACAGGTTGCCAATCTCACAAAGCAAGCGATGCAGGGCAACATGACGTTCCAGCAGTCGCTGACAGTCAGGCTCAACATAATTCAGCCGAGCCTCTCACAGATCAAAGAATTCCTGAAAACACACCCACCAAAGCTGACGCCCGGCATTAAATCTTTGGTACAGACACTGCAAGATCAGAAGAAACAGGTCTACCTGGTCTCAGGCGGTTTTCATTGCCTCATTGCGCCTGTTGCTTCGCAACTTAATATACCGCAAGAAAATATTCGCGCCAAC…	976	0	99	976
Rac GTPase	GL276289.1	17	676592 to 676256	GTTTGACAATTACTCTGCACCAATGGTAGTGGATGGTATTCCAGTAAGCCTTGGCTTGTGGGATACAGCAGGTCAAGAAGATTACGACAGGCTCCGACCTCTCTCTTATCCACAGACAGATGTGTTTCTCATTTGTTTTTCCGTGACAAGTCCATCATCGTTTGAGAATGTCACCAGCAAGTGGTATCCAGAAATAAAACATCACTGTCCAGACGCACCAATGATTCTTGTGGGAACCAAAATTGATCTGCGAGATGATCGTGAAACACTAACTGCCTTGGCTGAACAAGGGCTCAGTGCCATTAAACGTGAACAAGGACAGAAATTAGCTAATAAG	337	1.49e-179	99.1	609
Rac Serine/theronine kinase	GL277768.1	1	2228991 to 2229330	AGGACTGTTAAATAAGGATCCAACTAAGAGACTGGGCGGTGGCCCTAACGATGCCAAGGACATAATGGATCACATGTTCTTCTCGTCGATAGACTGGAATGATCTTTATCAGAAGAAGATACCACCACCTTTCAAGCCTCAGGTTACTTCGGATACAGACACTCGTTACTTTGACAGCGAATTCACGGGTGAGAGTGTCGAGCTTACGCCTCCCGATCAGGGCATCCTGGGCAGTGCCGGCGGCCTCAACTCGATTGTCGAGGAACAAGAACACTTCCCTCAGTTCTCCTACCAAGAAAGTCACTCGGCGGCCACATCCTCAATTTCCATCAATCACTGA	340	0	99.7	1623
RAP gtpase-activating protein	GL275162.1	4	2322709 to 2322100	CGATGCTGTCGTTCAGCAGTAAGAAAAAGACCGCAGCCCGTCCGCGGCTCTCGTGCGACGCCTCTCAGCGCGGCGCGATCTGCTGGCAAGTGATTCTCGAGGACAGCAATCAAAACACAGACTGTTATCTCGGCATCAGTGTTGATACGATAGTCTTGATCGAGGAGCACTCGAGGCAGATTGTCTTTGTCGCGCCCTGCATAAGCGTTTTGGGGTGGCATGCTCAGACGAACAGTCTGCGACTGTATCATCACCAAGGGGAGTGTATAACGATTCACGTGCGAGGTGATTACGGTGATAGAGACGAGCTTATGGAGATAGTCGCCCGTCTGCGCGCCGTCACTCAAGGAGCACCGGCCTCCGAACTCTCCCTCAAAAGAAATGCACTCGGCCAACTGG…	610	0	99.2	4623
RE16127p	GL273943.1	51	1187319 to 1187069	GGCCCAACTCAGACTCCTTGTCCTGCGGGTTACGTCTCATGCTGTAGCCCAGGCAATCAAAATCAGGTGGACGGCACCTGTGGCATCCGGAAAATCACTCCAACGCAACAACCCGTCGTTGGTCAGGCAAGTTTCGGAGCCTACCCCTGGCAAGCGGCTCTATTGAACTCCCAACAGGCCTATCTCGGCTCCGGTGTTCTTCTCGATGCCACCCACGTACTTACTGCTGCTCACAAAGTCGCAGCTTTCGT	251	4.77e-133	99.6	960
RE18590p	GL275973.1	16	3604526 to 3602119	TGCAGATAATGGACGGTAACACAAAAACCGAAGTGAACAACCGCAAGGAGCCCGGGGTCTTCTGCGGCGAGAGCGAGCAGCCGCAGACCTTCATCTCGGAGACGTCCTTCGTGCGCGTGCTCTTCCACACGGACAACTTCACCGACCAGACCTACTTCAGTTTCGACACCCGAGCCGAGCAGCAGTTCGAGGTCTACCTGCGCTACGGCCAGCACCCGGAGCTCTATCCCAACCGTCGCGGCGAGGTCGTTCCCGGCACCTACTGCGAGCGCAGCTTCAAGGACTGTCGCCTGCAGACCTGCTACGTCCAGTCGCCCGCCTTTCCCGGCATCTACCCTCGCGCTCTGCACTGCAAGTACCGGCTCAACACTCGGCTGCCCTTTATCAAGCTCTACATCG…	2408	0	99	2703
Receptor tyrosine phosphatase type r2a	GL276173.1	6	1647734 to 1648668	AGGTTTGGTGGGAGCCGGTGCCGAACCGCGGCAAGATAATCGGCTACGAGATCTTCTACACGATGACAGCCGTTGAGGATCTCGATGAGTGGAAGAACAAGAGCGTCGGGCTGACCGAGTCAGCGGACCTCATGAATCTGGAGAAGTATGCACAGTACGCGGTGGCGGTGGCCGCTCGCTACAAAAACACAGCCAACGGTCAGAATAGCCTGGGTCGTCTGAGCGACAAGGCGACAGTGAAAGTCTGGCCGGAGGAAGTGCCCCTCGAGCTGCAAGCTCCTGAGGTCTCGACCCACTCAATGATGCTCCGTTGGAAGCCGCCCATCCGTCTCAACCCGGCCAACTACCAGGTGAGCTTCGACGCCGTCAAGGAGTTCGTCGACTCGCAGGGCATTACCC…	935	0	98.8	6141
Relish	GL274073.1	12	221408 to 221019	CGAAGATGATACCCCCCGACCTGGAGAATCTTCTTTCGACCTAGCTAAGAACGATCCTAAACTCATGCAGTTGCTAAGCGAAGGAAAACCAGACGATCCCATCCAAGAGGAGCTCGACCTCAAAGAAGAGTCCGAGGACGAAATGATGCTACAAGATCGAGCAATATTGCAAGCTTCGCGTACCTTTAGTCAGGGTAGGAGAAGTAGTATCCAAGAGCGGCCAGCTGTTCACCCAACGGTGACGAAGACTTCACCGACCACGAAACCTCAATTGCAACCGGCTAGACCTGGTGATGAGAAGCTCTCGGACGAGCATGTAAATCGCATACTGCATATCCTAGATAGGACTGGAGGATGGGAACGACTGGCTCAACACACGAATCACGGATCGCTGGTCAG…	644	0	98.2	2799
Rhogtpas	GL277538.1	9	1704039 to 1704328	GGTATCTCAAGGACTACGACTACTACCAGAAGTGTTTGGCTGAGCAGGACCGCGAGAGCAAGCCCACCTTGAAGCGCAACCGCAACCAGTCGTCCAGCGGTTCAACCTCCAACTCTTCATCCTCTGGCGGATGTCTCTGCTTCTCGAGCTCCAACAAGTCTCGGCGCTCGACCTCGGGTGTGCTAACTACCTCGACGACGACAACGACGACCGTCGGCGAGGCCACACCCGAGCGGCCCCTGTTCGAGTCGGCCGTCATCGACGCCGCTGCTGCCGGCGAAGCCGTATGA	290	3.02e-155	99.7	2247
Scabrous protein	GL274073.1	12	2702937 to 2704145	CAGCTGAACGGCCTGCAGCTCGAGCTCAAGTCCCTCTCGATCAAGTGCGAGACTGGCTGCGGACGCCGCGGAGCATCGTCCCATCACAGCTCGGCTAAGCTGGCGCATCATCGACTCGACGAGCGACTGAACAAGCTCGAGCACAAGATCGGCCTGGTCTCGCGCAAGCGCGGAAATCTGCTGGAGATCGCGCGCGCGGCCGTCGGCTCCGGGGCGAGACTCACCGGACGCTTGGAGCTGCTCGAGTCAAGGCTGAGCAACGTGAGCGCCGCCAACCGCGAGCTGGCCAGCAAGAGCGAGTCGATGTTCCAGACCCTGGCGGCCAACCAGACCAAGGCCGCCAGGTCCATCGGACAGCTGGAGGTCGGAGCGGCGAGGCAGGCTGCCGAGCTGGGAGTG…	1209	0	97.8	1872
Scarface CG11066-PA| isoform B	GL274664.1	33	1278063 to 1279519	ATCACACAAAATGCGTGGCTCACACGCTTTATTATTGGGCCTGACGGCGTTGGCTTGTTATGCCAACGTACACGCCGAGGTTCAAGACGGCACGTTACTAGAAGACGGATATCACTACAAAAAGTCATCCTCAAGTTCTAATTCGAATAGTTATAGTCAGTCTCATGAAGATGATCTTGAAATCAATGGTATCGTGAAGGGCCAACCTATCAAAGGCGAAAAGAAATCGGGCTTCAGCACTAGTGGTGCCAGCCACAGTGAGAGTAAATCTTTCGTCTCCGGCTCTTTCAGTGGCAACGTTCCTGGCCTTGCTCCTGGCAATCTTTTAGCTGGTGTGTCATCAGCTTTGGCTAACGCAAATGCAGGATTGCAGTCTCAAGTTGGTTTTGGAGCACTTTC…	1457	0	95.7	7037
Scavenger receptor SR-C-like protein	GL274178.1	2	1625392 to 1625867	ACGACGCTCAATGAAACAAGCGTCGAAACAAGAGCAACTACTGCGCCGCCGACGAGAATAGTCTACAGCACGGCCGCATCGACAATGAGCGTTCACGTGGAAACTCCGTTTGTCAGTCGGGTGCATGAAACTAGCACTATGCCGACAACTACGACTACTACGAGTACGACTAAAACGACGATTGCTTCTAGTACCACTACGACTAAAGCGTCCACCGAACCGACCGATGACGACGCGCAAGTGCAAACTGAACCACAACACGTTCTGGCTGAATCGTCCAGACATCAGTCGACCTTCGGCCTTTCTGGAATCATCGTCATAGTCATCGGCATTTTGACGGGAGTCACGATAACCACGGTTGTGGCGTTGGTGTTTCTTCGACGGCGACGCAGGGGCTCC…	725	0	98.5	2114
SD07139p (LOC100117054)	GL277538.1	9	444866 to 445300	AGTGGCGAGTCGAACTAGAAGAAATCATCGAGGTAGCCTCCCTCGACAGCGAACTATGGGTCTCCATGCTGTCAGAAGCGATGAAAACCTTTCCCTCCACTGGCTCTCTAAACACAGACATTTCAGATCTCGACGAGCACCGTCCGATTTTCGGCGATCTCGTGAACGATCTTCGAAAATTACTGAAAAAGCAGAATGATCCTGCTATGCTTCCGTTAGAATGTCACTACCTGAACAAGACTGCATTGACATCCGTTGTTGGCAACCTGCCTTCGCCCACTAAACATTTCACACTCAAGAGAAAACCAAAAAGTGCAGCTCTCAGGTCTGAGCTGCACCAAAAGAGTTTGGATGCTGCGAGCAATATGAAAAAGAACACAGCACCTACAGTTCCTGTCA…	435	0	99.5	1611
SD22390p	GL274950.1	14	3217338 to 3216689	AGAACCACGTAAGCTACCAACGCAGGTCGGTCTGCTGCAGTGGCTACACGAACTATGGCTCGTCGATGTGCATCCCGCTGTGCAGCAAGAGCTGCGGCTCCTACGGAGTCTGCTCGCAACCGGAGACCTGCAAGTGCTTCCAGGGCTACAGCATGGACCACTCGATAAACGACTGTCGTCCCGTTTGCTCGAACGAGTGCGTCAACGGCAAGTGCATCGCTCCCAACACCTGCGTCTGTAACAACGGCTTCCACAAGCTGTCCGACGGCTACACCTGCAAGGCCACGTGCAACAACTGTACCAGCCTTGAGTTCTGCGTCGAGCCGCACATCTGCAGGTGTAAGCCAGGCTATCGCAGGTCATCGCTGGATCGACTGGATTGGATTAAGGAGGCATCGC…	650	0	98.5	2539
SDK-P1	GL276749.1	7	1943728 to 1943197	CCTTTGCAACAAGTCGAATGGTACGGCAACCCCCGAGGGTACAATATAACTTACAGAGAAGTTCGTACCAACAAATCCAAAAGTATCAGCATTGACGATCACACAGCCAACTCGTACGTGCTCGAGAATATGGAAGAGTTTGCTCTGTACGAAGTATACATGCATGCTTACAACGACGTCGGTTCTTCCACCTTAAGCCCCAAAGCCGTGGAACGTACGCGTGAATCTGTTCCATCTCTTGGGCCTATTGGCGTTGAAGCTAATGCAACTTCATCAACGACGATTGTAGTCAAATGGAAAGAGGTACCGATCGAGCACCAAAACGGACAAATTGAAGGATACAAGGTTTACTACAGGGCAAATACGAGATCTCCATTCCAATTCAAAAACATTCCTAGC…	532	0	99.6	6438
Sensory neuron membrane protein 1	GL277768.1	1	2938969 to 2938713	AAAATGACACACCCACGACGAAGCGTCTCCGAGTCTTGCGAGGTGTCAAGAACCTGATGGACGTTGGGGTCGTCGTCGAGTACAACGGAAAGACCAACATCTCCACGTGGGACGACGATTACTGCGACACGTTCAACGGCACCGACGGCACCATCTTTCACCCCTTCCTCTACGAGAACGAGGACGTCGTTTCCTTCGCCCCGGATCTCTGCCGGAGCTTGAGCACCACTTACGAGGAGAAGACCAACATAGCCGGT	257	1.28e-127	97.7	1575
Serine Protease	GL276948.1	38	196344 to 199214	ATATATATATTTTTTGTTTAGTTTAACGTCGTTGACTTTTTTTGTTTTCAAGGCATGTATGTGATAAAAAAAAATTATCTAGGAGCAACTTAGAAGATAGTGTTGGCGAAGATCCAGTCGAGGTAAGCGTTTACCCGAGTGTAGATGCCAGGCTTGTCGGGGTTGCCACAGCCGATTCCCCAGGACACGATACCGATGTTCACCCAGCGACCGTTGCCCAGCTGATGCATCAGTGGACCACCGGAGTCTCCCTGCGCAGATTCAGTTAGTTTATTTANTTTTTATGTTTTTCTTTTTTTTTCGATCAAATTTTATTTTTGCAATGAATTTTGCCATAAACCTACCTGACAGGCGTCGCCGTTACCAGCGTAATCACCGGCGCAGATGTTCTTTGCGGTA…	2871			3136
Serine Protease	GL274339.1	123	195567 to 197049	ACACACTCTCGAAAGGGGCGCGCTGCATGCAGTTTTACATATTTAATTATCTGATCGAGCTTATCTCTGGTGATGAGCTAATTCCAGAAAAAGAAGAAGTAGGAGGAAGAACGCAAGCAAGAACGAACAAGCTTGTGTATATACTTATACAGCCGAAACAACGATTTCTACGTTTCGTCGCCTACAGATTAGAATTTGAATAAGAGATTATGCGGTAGTTTTTATAAACTGAATGATACTAAGGTTTTACACGTTGCTGYMRCKYKARTYTTCGACYAGYCKRMYTCTYRCNNNNNNNNNNNNNNNNNNNNNNNNNNNNNNNNNNNNNNNN-----------------NNNNNNNNNNNNNNNNNNNNNNNNNNNNNNNNNNNNNNNNNNNNNNNNNNN…	1612	0	95.8	2114
Serine protease	GL274339.1	123	191034 to 191763	GATGCAGGTGAAAATTGCACCGCACACGATGCTTCTGCCGGGGCTTGCATCCTTCTATCGACATGCGATAAATTGTTAGAGATGATTATGACATCGAAAAGAGCAAAGATAGATCATAAGGATGCCATTGCAATCATCCAAAAATCAACTTGTGGATTTATACAAGTCGAGCCTTTGGTTTGTTGCCCTGGTAAAAAATTGGGTGATGATGCTTTGAACGATCCACCACCAAAGTTTGATGAAGAATATGACGCAGATAGACCCATGATTAAAACAACAAAATCACCGATCGTCACATCAAAAACTATGAAACCAGAACAGAAGCCACCGCAACACTCACAGCCATTAACCACCACTAAGCTACCGAAGAAAACAACTCAAGGTATACAAAGTGCACCA…	730	0	97.9	2853
Serine Protease	GL275793.1	16	3839997 to 3840977	CGAGGGCTATGCTGCCCGCGTGTGGAGGCGTGTTGCTGTCCAGCCGATACGTCCTGACGGCGGGTCACTGCGCGGCGAACCTCGGAGCCAACTGGACCTTGAGCGGAGTTCGCCTGGGCGAGTACGACATCTCGACGCCGCTGGATTGTCTGCCGGACGGCGACGCCAGCAACAGCTCGACCTGCATCCCGGAGCATCGCAGTTATGCCATAGAGCGGCGCATAGTGCACGAGAAGTACAGCCGGGATAGTACAGGTCGGGGTCACGATTTGGCACTGCTGAGGCTGGCCGAAGACGTGGTCTTCAGTGAATTCGTTAGGCCTATATGCCTGCCCACTAGGTCTGCCCAGCCGCAGAGGTTCCAGGTCGCTGGTTGGGGAAAGTTGGCGGGTAGACGTG…	982	0	98.7	2120
Serine Protease	GL274339.1	123	189291 to 189995	GCAAAGGGCACGAT--CTGCC---------------ACCACCA-----------CCTTTTGCAGCTGGCAGT-CTGGCTTCGTATCTTCGACACGACGGATTGCCGATGTCTTCTGAAAAAAGCTCGATCTGATTAATGACGAGTCACATATGAGCTGAAACAATGAC-GC-TTAACGCACGGAATGCCTTATTGCTCCTCGCGAGCA----TTTGCGGAGCTATTCATTTTGCCGCTTG-CGAAGGTGACTTCGTAATAGATAATCGTAACGAGGGAAGCTGCACAACGCCTGA-----TGAGCAGCAGGGTCACTGTCTAATGATTGAA----GATTGCCAG---------TACGTCTTTAACATCTTCAAGAATAAGGGCATAAGACACCCCGACG…	943	0	98.3	747
Serine Protease	GL274339.1	123	201195 to 204747	ATGTGGACTTTGAAAGTTCTCGGACTGGCGCTGGTTCTTGCGGTGCCGGACGCGTCCTCACGTAAGTATACACTACACTATATCTACCGATGCCGGCGTAAATAATTGTTTGCTTACGTTGGCTTTGCTTGGTATCTACCTGTATGCATGTGTATACATAAATCCTCGCATAGCCTCGCGGATTTCTAGATTGTATCCGGACGCTGATTCTCATCCTTGAAGCCGCATACTCGCACGAGTCGAGATTTTGCACATAGCGCGCTTCATAGTTGCGTATATTTCGTTTCACGGGCCGAACTGCATCAGAACTCGACGCGGGTTGAGCTTTATCTTAAATACGCGATTACGCGCGTACGCGGTTTTGCGGAGGTATGTGCATGATGCATATTCGGATACATA…	3553	0	97	4228
Serine Protease	GL274307.1	42	443247 to 443735	CAGGCAAGATAATACTGTAGAAGTATCGAGAAAAAATGGAATACCATCGTACTTGAAATTTAGTACAAATTCATTACTCATGTCATTTGTCTCAGCACTTGATGGATATTATCGTTTATCTATAAAATGGACATTCAATCTTTGTGGTGATGCTGTGACGCCTAGCTTAGAACGTTTACATAGGCTAAAATGCCATGGACCTGTTGGTGGGGAATTTTCATATTCAAAACTTGAAGACAAGAGAGCCAACAGAGCAGGAACGTTTATTTTGCGAGAGAGTGAATCTAAATATGATGCATACTATTTGGATGCTTGTGGAAGAGATTCCAAACCACGAACTCGAAAGATAGAAAAAATCGGACCTGAAGATTTTGCTCTATCAGAATCCATGCAACGATT…	489	0	99.6	7107
Serine Protease	GL276749.1	7	392729 to 393043	GCCCGGTAAGGCCGTACGACATAGCCCTGCTGAAGCTCGCGGCTCCGCTGAAATTCAACGAGTACGTGGGGGCGATCGGACTGCCAGCCCAAGGAAGCGAACCCCCGGGCAGCGCGACCCTGTCGGGCTGGGGCTCCGTGTCCCGCACCGACGACCGCATCGTGCCCAGCTATCTTCAGGCGGCGACGATGCCGATCATCGACCTGGACACCTGCGGCAAGATGTTCGCCGCCGAAAGCCCCGACTCGAGGTTCGAGCTCAGCGAGGACAACCTGTGCACCGGACCGGGCTTCAATCGGCTCTCGTCCTGCAACG	315	1.54e-154	96.8	1356
Serine Protease	GL273815.1	10	866516 to 866199	GATCCGTCGGTCCCTACGACATAGCCCTCATGAAGCTGGAGGAGCCCTTCGAACTCAACGAGTACGTCTCGACCGCGTCTCTGCCATATCCCGAGGAGAGCCACCACGGAAACGCGATGTTGACGGGCTGGGGAAGCATCAGTCGAACGCGAAGACCCGAGGCTCCGGAGGTCCTGCAAGCGGCGACTCTGCCTCTGCTCGACTTCCACGAGTGCAAGGAAGCGCTGGACAACCGTCTGAAGAAGGAGGGGCGAAACCCACTGCACCCCACCAACATTTGCACGGGGCCACTCGATGGCTCGCAGTCGGCGTGCAAGG	318	3.64e-168	99.1	1092
Serine Protease LOC100114471	GL277538.1	9	1313909 to 1313356	ACYCANNNNNNNNNNGAACCCCKGNNNNNNNNARMYSGTGGARWCRCNNNNNNNNNNNNNNNNNNNNNNTYMRAAYCMKGRARCTKGTGGAMMGACTMWGNNNNNNNNNNNNNNNAWACCCNNNNSGAMCTSGYSGACANNNNYGARGTKSYAWSTCWGNNNCCSGRARCTRRYGNNAAYACTYMGAMYMCWGSAAMTGSTKSACNCACTNNNNNNNNNMAGAANNNCYYYGGWRMYRRKGGACACWMYCARRNNAYCCTGRARSYKGTKGANNNNNNNNNNNNNNNNCACGNNARGTSCCARMWCARNNNNNNNAACMCTSGWMYTGGWRGRYACWYCMARMWCCMTGRRANNNNNNNNNNNNCTGGTGGNNNNNNASRCAYTNNNRACSCTKGCACT…	804	0	96.9	2549
Serine Protease LOC100115421	GL277646.1	11	1518765 to 1517539	AGGGTGACAGTGGCGGTCCTTTGATGCTTGAGAAAACTGGAAAATGGTACCTTATTGGTATCGTGTCTGCTGGATATTCGTGTGCTCAACCCGGACAGCCAGGAATTTACCATCGTGTTGCGAAGACGGTGGATTGGATTACGTATGTCATTAATTCGTAGCATACGAAATATGACTAAATGATCAAAGAAAAATTACCATTTAACTGTTATACAATTCGAGCGTTGGTATAGACAATTTGACAAACAAATGATGTAAAAAGATGCATTCATGTTCTATGCCAAAGTCAGATACATTAGTACTTGGGAGTTCAAATGCTTCATTAACGGAAACACCAGTTGTTGAATCGATTGTAATGCGATACCAAAAATTAATGTCTCTGATTTTCATTGAGTTATG…	1227	0	97.1	1509
Serine Protease Precursor(putative)	GL277133.1	19	2806787 to 2807418	CAACGACCATTCCTCGCTAGACAGTTCACGGTGCGTCTAGGTGATATAGATCTCGAGAGGGACGACGAGCCCTCAACGCCGGAGACTTACTCCGTCAAAGAGATTCACGCACACTCGAAGTTCTCGCGCGTTGGATTCTACAACGACATCGCCATCCTGGAGCTGGACCGACCGGTTCGTAGAACGCCTTACGTCATACCGATCTGTCTACCTCAGACGAGACACAAGGGCGAACCCTTCGCTGGAGCTCGGCCTACGGTTGTCGGTTGGGGAACGACCTACTATGGTGGCAAGGAAAGCACGGTCCAACGTCAAGCAGTCCTGCCGGTCTGGCGCAACGACGACTGCAACCAGGCTTACTTCCAGCCGATCACGAGCAACTTCTTGTGCGCCGGTTAC…	919	0	97.6	1720
Serine Protease precursor(putative)	GL277752.1	21	2637409 to 2637158	GTAAGGAGGTCGGTAAAATCAAAATTGTAGTTGGTAGTACGTCAAAATTCGAAGGCAAAGCGTATCAAGCTGAAAAGCTCATCTATCACGATGACTACACCACGGCAGCATTGAAAAGTGATATTGGCCTAGTGCGAGTTAACAAAAACATCGTGTTTAACGATAACGTCCAGCCAATCAAACTTGCTTCGAAAGATACGACTACGGATATCAACGAAAGCGTTATTAGTGCTGGATGGGGTAGGGTCGAGG	252	5.3e-132	99.2	1320
Serine ProteaseLOC100115458	GL277752.1	21	2843989 to 2846507	GAGTTATTTCAAAGTTACTATATTTCTGAAAAAAGTTGCATACAAAAAATATAGTAGACATGC-----------GTGTTTCATTGGAAGAGCGAAAGTTCCAGTTGTTACATGTTAAA---TTTGGTTTCG------TAAGTTAATTGGTCCATTATAGGTGTCG-TTAAGATTCGCAAAAAAAATATATAGAGGAGCAACTTTTCAATGCCCAATAAACTAGCGACTTCTCAAATATAACACTGAGTTCGGTTTACATTCTAAAGAAAAATAAATAA--ATATTTATAAAA---CCTTCGCA-----TGTTCA-TTTGCTTTATGCTTAATCTACTAGCATTGCA-----ATATTGCTAGTATGTTCACGCGCTATAAGACACAAAATCGTACACTTT…	2598	0	98.5	3561
Serine Protein kinase	GL274210.1	22	2131568 to 2132215	ACGASATSSSCGWSYRCWSCTYRRASTRSGRSRWMMYKYTSGKMWGMRMSRWCMWGMMGWKCWKCWRYCMKACGARRCWYYGNNNNNNNNNNNNNNNNNNNNNNNNNNNNNNNNNNNNNNNNNNNNNNNNNNNNNNNNNNNNNNNNNNNRGKATCMRRCYGKSKGGAGCGAATTCGAGTCACGAGGGCAGGATCGAAGTCAAG----------ATTTTCGGAAAATGGGGACAGGTCTGCGACGACGGCTTCGACA--------------------------------------TGATCGACGMCRRCRTSRTYTNNNNNNNNNNNNNNNNNNGCSYKGGASMYYTGGASGKWSGACCTGRYRSWTKCKACGGWRAYYYARRYSSACCGKNNNNNNNNN…	1117	0	97.2	3381
Serine type endopeptidase| putative	GL275014.1	24	624128 to 623831	GGCGCCTGGCCATGGGTCGCGGCCCTCGGCTACAAGAACAAGACGACCGGCCGCATAAAGTGGCTCTGCGGCGGCAGCTTGATCTCGGCGCGACACGTCCTCACCGCCGGCCACTGCGTCTACAACCGGTACGACCTGCACGTCGCTCGACTCGGCGAGCACGACCTCTACAGCGACAACGACGGGGCCAACCCGGTCGACGCGAGGATCGAGCGCGGTACCATCCACCCGGGCTACAGTCCCGAGAACTACGTCAACGACATCGCCGTCCTCAGGCTGAAGCGCGAGGTCCCCTTCA	298	1.26e-156	99	810
Serine type endopeptidase|putative	GL274944.1	144	82300 to 81737	AACGAGCTCAACACAGGCAAGTTGATGTCCATAGAGAGCTTCAAACCACACCCCAACTACAACTCGTCGCAGTTATACGCCGATATCGCCCTTATCAAGCTCTCGAAACCGGTGGAATTCAGCAAGACGGTGAAACCAGCCTGTCTCTACCCGATCCCGGACTTGGAGCCAAAATACCTATGGGCCAGCGGCTACGGATCCACGTCATCCTTTCGTCTCAGGGAAGGTATGACGTGTCTCAACTTGACCAAGGCTCGGCTGCAGCTCACCGACATGAAACATTGCAAGCAAGTGTACCGAGGCGTCAAGCAACTGCCCCACGGCATAGATTCTGAATCGCAGTTGTGCGCCGGTGATAAAAAAGGCGGATGGAAGAGAGACACGTGCGCCGGAGACTCG…	564	0	97.9	1470
Serine/theronine protein kinase	GL275014.1	24	1513716 to 1514036	GGATACAATGGCTAAGCGTAATACAGTCATTGGTACTCCGTTTTGGATGGCTCCAGAAGTTATTCAAGAGATTGGATATGATTGCGTGGCTGATATTTGGTCTCTGGGTATAACAGCACTTGAAATGGCAGAAGGAAAGCCACCTTATGGAGATATTCATCCAATGAGAGCAATTTTCATGATTCCAACAAAGCCACCACCTAGTTTCAGAGAACCTGACCAATGGAGTCCAGAGTTTATTGATTTTGTCAGCGTGTGCCTTGTTAAAAATCCAGAAGAAAGAGCAACAGCTAGTGAATTACTGAATCATGAATTCATAGG	321	4.4e-175	100	1566
Serpin	GL274950.1	14	1443203 to 1442801	AGGTGACGTCACCTCGGACACGCGGATGATCCTCCTCAACGCCGTGTACTTCAAGGGCAAGTGGTTGCACAAGTTCCACGAAGAAGCGACGGAGCCCAAGCCCTTCCACGTCAACAAGACGACGACGGTCGATGTCCCAACGATGCACATCACCAAAAAATTCTTTTACAAGGATCTGAAGGAATTGAACGCCGAAGTCGTAGCTCTTCCGTACGAGAACGAAGACTTGGCGCTGGTGATCATAGTTCCTAAAGAGATCGACGGACTGAAGCAAGTCGAGGATAATCTTGAGAAGATTCAAATCGACGAGCACGACCTCAAGCGCTACAAGCGCGAAATCAATTTGGCGCTGCCGAAATTCAAAATCGAGACCACCATAGATTTGAACCAGCATCTCGA…	539	0	99.3	1281
Serpin 3a	GL274178.1	2	1006030 to 1065681	ATATCCGAGAGCAGTGCAGCKCSRYMSTCRRMGCMRAYKCCRTCKNNNNNCGGCSGACACGARGAYGNNNNYGMCMACYGCKKYGTMSKYCAWRGGGACGKGSSTGSACNNNNNNNNNNNGAGCGYCANNNNNNNGARSTKCTTCAACGYYSMGMWWCTGSRSKRSCWRMAMGWGYCCNNNNNNNNNNTCGTCGAGAACTACAAGTACAACTACGTGCCNCGCTCTMGACGCCCAAGTCATCCAGRTCGAMCCTACACGGG--CGAACG-----------AGTGTCCATGGTGGKGCTWCYGCCYRANNNNNNCGKMGMACAGGCCC--TCCGTGACCTGTCCAGGGATCT-GGCCTTCA-----CCCCGGTGT----CGGTGCTGCWG-------TCG…	940	0	94.8	3171
Serpin 4B	GL274178.1	2	1627350 to 1626527	AGGTGACGATGTACGCCATCCTACCGAACAACCCGGGTGCGGCCGCCCTCAGGGAGATGAAGCACCGACTCACCCCCGAGATCATCGAAAACCTGATCGCTAATATGAAGAACAGCTCGTGCATTCTAAGCTACCCTAAGATGAAGCTCTCCAGCACCCTGAAGCTCCAGAGCGCTCTGGAGGCCTTAGGGCTGAGCTCGCTTTTCAACCCGTATACTGCCGATCTGAGCGTTCTGTCCCCGGGTCGCGCTGGCTTCAACCGCACCCAACCACCTCCACCACCCTCCACTCCCAGCCGAGCCCCGACCACCGGCTTCAACGGCGGCTTCCGTCAACCCACCAAAACGCTACACTCGGACTTTACGTTCGAGCCACGCTTCCACGGCGCGCGCAGCAATA…	824	0	98.2	1983
Serpin 6	GL274950.1	14	1433574 to 1433311	GCCACTGAGATCGACACCAGCAAGCCCGCCGAGTCCGCCAAGGTGGTCAACGACTGGGTTGACGAGAGGACCCACCA-CAAGATCAAGGACATCGTCAAGGAAGATGACATCACCAGCGACA-CCCGCATGCTCCTGCTGAACGCCGTCTACTTCAAGGGAAAGTGGGCCAAGGAATTCAAGAAAGAGGGCACCCAGGACAAAATCTTCCACGTCGACGCCAAGACCGAGAAGAAGGTCCCCACCATGTTCGCCTCCGGCAGCTACGTCTACGGTGAACTTCCCGACCTCAAGGCCAAGTTCGTCGAGCTCCCGTACGAGAACAAAGACTTGAAGATGGTCATCATCGTGCCCGACGAGATCGAGGGCC--------TGA-GCGCCATCCAGGAGAACC…	653	1.44e-127	96.7	1775
Serpin 6	GL274092.1	112	378790 to 383324	ATCATTTACAAACATTATTCAGTGCCTTAATTATCACATAGAAGCGGATTTTCATTAAAAAATTGCTATTTCCTTCGAAACATCTCGAAACTTAAAAAAGCCAAAAAAANTCAGGCCGCGGTTCGCAGCTGTATCTCGGTTTTGAGACTGGCAAACGGGAAAGCCGGAGCCATCGGGTGACGTCACGTACCGCCTCGTGCAAGCCGCGCCGCTTTCACTGTTCTTCGAACGCGCGCGAGCGCGACATCGGCGCTCGTCGGGCTAATATGTGAAAAAAATTCAACGTCCGCATCCTTTTGTAACTACTAATACGCACTGCGTAAGCGACTGGGAAAATATTAGCATTATTTCCTGGAACGTGTATGAAGCAAACGCTGCTACGTTTGCGGCGTTAGCGAT…	4614	0	97.2	9697
Shoc 2	GL277752.1	21	1427287 to 1425659	CAGGTTAAGGAGCAGCCAAAGGAGAAGAAATTATCTAGCGCCTCCATATCTTCCAGCGACACAAAGAAGACTGTCACAGTCAAACATCCAGAATCTAACAAGCCCAAACCCACGGCAAAAAAAGGTAAACCTATACAGGCAGACTTGGATGTTGCCAAAGAATTTATAAGATGTAGAGACGAGGGATTCAAGAGGCTCGACCTCAGCAAATCCAGCATAACAAATCTTCCAAACAGTGTGAGGGATCTCACTCATCTAGTCGAGTTCTATCTTTACGGCAACAAATTAGTTACTCTTCCTCCTGAGATAGGGTGCCTAGCAAATCTGAAGACACTGGCCCTCAGCGAGAACTCGCTGACAAGCCTACCCGACACTCTGGAGAATCTGAAACAGTTAAAG…	1629	0	98.8	1749
Signal Transducer and Activation of Transcription	GL274950.1	14	387538 to 386913	AGMTKGRWGMSAGRTCRMYRRKKMGCTGRAMRYGRWRYYMYGTTYNGCTASTRRTYKRGMTSYYAYWSAAGANNNNNNNNNNNNNNWTGGKGMGAAAGYYTTNNGCKGAGKTNNNNNNNNNNNNNNNGATTNNNNNNNNNNNTKGCTSARYYGRSMRCAGNNNNGTRAAGRANNNCSAYYRYCYSARAGNNNNNNNNAAWCTTKASCYWCYRGGARTNNNNGRTWTTMTSCYGYWRYKRARYTMAMACRYKANRCAWTTGCKYRGWYCCTKGNRTGACGRRTAYNTTTTAKSATTNNNNRRAAAGMAGCMRSCYSAGGWSATGMWRRCCANNNNNNNNNNNNRCACCYKYYTTAYRAGNAYWKTSCGACNNTYGGWASKKGGCRRRSTKAMCRTTSMYW…	715	0	99.2	2379
Similar ro RE18634p	GL274073.1	12	2078003 to 2081728	GACTACTGCAGCTACCCTCTGCTCGATCGAGCACAACTGAAAGCTACCACAGCTCTGCCTGAACGTGGACCATCCAATGCTAGACTTTACGGAAAGAGTGCTTGGACTGCCAGTAGTTCAGATTTTAGCCAGTATCTTATTATCGATCTTGGAGCGACCTACAATATCACTGCCATCGGCACTCAGGGAAGAGAGCATCACAACGAGTATGTCATGGAGTACGGCATCAGTTATGGTACCAATGGCCTTGACTATGCTGACTTCAAGGAGACGGATGGCAACATAAAGATGTTCAAGGGCAACAAAGACGGAGACACTGTCAAATTGAACAAGTTTGAAGTGCCCATCATTGCTCAGTGGATTAGGATTAATCCAACTCGCTGGCGTGACAGGATCTCT…	3726	0	99.3	3801
Skp A	GL276340.1	127	279232 to 279803	ATGCCGAGCATAAAGTTGAAGAGCTGTGACGACCAAGTGTTTGACGTTGAAGTCAAAGTTGCGCAATGCTCCATTACCATCAAAACTATGTTGGAAGATCTGGGTATGCCAGAGGAGGACGATGATGAGGAACCAATCCCTCTGCCAAATGTTAATGCCACTATTTTAAAGAA-GGTTCTGGAATGGGCTACCTTCCACAAAGACGATCCTCCAGTAAACGAAGATGAAAACACAGAAAAAAGAACGGATGACATTTGCGAGTGGGATATGGAGTTCCTTAAGGTAGGCTTTTGTTGAGAAAGCAAGTTTGAATGTTAATGATTTGTAAAACGTTTCGCTAACCATTATGATTTCTTTTGCAGGTTGACCAGGGTACACTCTTTGAGCTCATATTAGCT…	573	0	99	573
Sortilin related receptor| L(DLR class)A repeats-containing like	GL274178.1	2	3238460 to 3239449	AGATATTTGATTGTCACGACCGGTGAAGGTGTCCCAAGTCCACCATGGAACGTTACTGCTGTTCAGAGGAATGGAACACGTATTGAAGTTACTTGGCAACCACCGATACATCCTAATGGCCAAATAACTGGCTACCGTGTGTACATGACACCTCCTATACCGCCAGCTCCTGTTTACCCACAGCAAAAGACGACTGTAATAATCGACGATGCCTTTGAAGCTGGTAAAAATTATTCATTTTGGGTGGTTGCCAAAAACAAGGAGCACGAATCAGAATCGTCCAACGTTGCAACCATTACTTTCGATGGTTCTGCCAATATCGATCACATTGAAGATCTGAAAGTAATCGACAAGACGAACCATTCTATTACTCTGAACTGGAAGAAAATCGACAGCGCT…	990	0	99.2	6565
SP 27	GL276037.1	46	793191 to 792583	TTTGTACTTGCGATTGCAAAAGCCTCTTTGTAAATTGCGTGCAAATATAGTCGTCATCATCGTCCTTTTCAGGACGATCGACACTCTTTATTGAATTACCGTGCGTTGCGTAGCGTGTGTGCATTTTGCGTGCGGTGTGCTGTTTGTGTGAGTACTTCGAGTGTTGGGACATCGGCGACGTGCGAGCTTCTTCGCCGTGTCGATTTCCATCCGGCGATTGCTACCTACGCGGCAGGGCTGAATAGATCTGCCCGTGGTCCAGGATTGGTTCCCTCGAGATGTCGAGGCGTCCTGCGACCAAGGAAGGTGCATCCCACCAATGTGCGGCCAGGGCTTTACATCGCGCCGTCCACGTCTCGTTCTGCGAATAAGGTAGGAGAGCTCTCCAGCGTGCGAAAG…	609	0	90.6	3665
SP 46	GL275596.1	55	148526 to 152248	GGAATAGTTTGCTGTATTACATTTATCATTTGAAATTGAAAATTTGGCTTATCTTCTAGTAAAAATTCAAATTCATTGGGCTGTTGTCTTTTATTATTTATAGATTCTAATGAAGTAAACGGATCTTCTTTCGTTTTCATCGATTTTCTTGACTTCATAATATTGCCACGAATTTGTTTATGGCGCCTTTTGGTTTTTTGAGGTTCCAATAATCCATTCCAGTTTCTCTCGTGCTTCTTTCTATGGTGTTGAGGATGTAATAATTTATTATCTTTCAAAGATTGTTCAACGTTATTATTTTTGTCAATACTATTATTTCGACTTGAGTGTTCTTCTTTTAAAGGATTTCCTCTCCTAGATTGTACTGGCAGGTGGTTGATTGATTTTTCCGAATATAGA…	3727			3989
Sp101	GL275014.1	24	2146889 TO 2146580	CCAGCACCGCTTTTTCGGTGCGCGAGCCCTACGCTCCTCGCATCACCGAGGGCGAAGATGCCTACCCTGGCCAGTTTCCCTACCAAGTCTCACTGCAGTGGGGCATCCCTCCGCTAATATTCTACAGACATGCCTGTGGTGGTTCCATCATCAATGAAAACTGGATCCTCACAGCTGGCCACTGTGTCACTAGTGTCCCTAAGCTTGGAAGGACCATCGTCAAGGTTGGTAAGCACCACATCTTGGAAGACGACGAAAATGTCCAGACCATCGAGATCGCCAAGAAGATCGTACACGAGGACTACCCAGG	310	1.23e-151	96.8	828
Sph21	GL275464.1	135	208641 TO 209786	GTTGAAGAGACTCCAAAACATCACGCTAGCGATTTAATTAAAATTATTTTCCCAAATATTCCATTGTTAAGCTAATTTTTGATCGACCCATACAACGTAGCTAGTCTGTTTGCTTCTTTTGCGAAATCCCACGTGTGATCATGCGATATACAAAAGTTAAATGAGCCCAGTTACTTATATACTTATATTACACATGACGTGTTTCGGAGCGTGTNNNNNNTAAACGTGAGTAGCTTCACGCGAAGAACAGTTCTTATTGGAATCATAGAGAGACACGCGAAATTTTTTTTACGAGTATAAACGGTGGGCATGGTTCAGCAACGCGATCGAATCTGCATTTGTGTGCTTGCATCGTAATATTTAGATAGCATAAATATAAATCTGTTCAAACAACTATTA…	3655	0	94.9	6115
Spz1B	GL274178.1	2	3773911 to 3774550	AGGCTTACCGCAAAAAGCGCCGTCGCAAGCTAGATTTCTGGAAAATCACGTTAGCAGAAAGATCGGCAAGATCCGCTTTCCGGGAGACGAACCAGACGAAGCAGACGAACCAGACGAACCAGACGCCAAAGTTGACACAGTGGCCAACCTAACCTTACCGACGCCGGTCTGCAAGGGCGATACCTTCTGCGTGGACCCGCCGAACTACCCGACAGCCGAGGTCGAAATAGCTCTTCGAATGAATAGTAAGGTTGCGAAGTACTTTGTAAATTCGGACATGGATCCCGAGGTGACGAATAAAGCTCTGAAACGCAAGGAGAACGACGAGACTCTGTGTCAGTCGTACGAAACGATCATCTATCCTAAAGCAGCCGAAAGCATCAACAACGAGTTCATGTT…	640	0	98	1074
Spz6	GL277224.1	8	760989 to 761327	GAAGCGGGCCGGTGAAAGCGAAGCTCGAAGCAGCGGTGCTGGTATCGGGCCCGGTGTCTCTCCGGTGCAGACCAGCTCGGCTGGAAGTACCGCTGGACATCATTGCGATGGCGTTGACGATATGGGCTGCTTCCAGGTCCGACTGTACTACGACTGGTTCCTCGTCCCTGGTAGCTGCAASTGCTGGCGTCCGGRCTACTTCAACCGCTACGTGCGCCGAAGTAATCCAAACCCGGAATTGTAAATCAGCAGCTCGATGAATATTCCAGCGAAATTTGATTTTTCAATTGTGCAGTATTTATTATTATTATTCCGTTTGTATTGGGACGAGTCCCGTTTTTTYTTTTTAAAAAAGATTTTTTTTTNTTTTTTTGTTACGAGAGAAGAGATTGTTTTGTA…	711	1.38e-171	97.6	1656
Sumo ligase	GL277538.1	9	4311109 to 4310787	TCAAAGAGAAACTAAACGAAGACGCGGACAGTGAAATAGCTACGACATCCCTTAGGGTATCATTAGCATGTCCATTGGGAAAGATGCGAATGAGCACACCGTGCCGTGCTTCAACATGTTCACATCTTCAATGCTTTGATGCTTCTCTATTTCTGCAAATGAATGAGAGAAAGCCAACGTGGAACTGTCCAGTTTGCGATAAGTCGGCATTATACGATAATCTAACCATAGATGGTTATTTCCAAGAAGTTCTTAATTCAAATAAACTTCTACCTGACGTCAATGAAATTCAGTTACTCCAAGACGGGTCTTGGGAAAACTTA	323	8.89e-173	99.4	1534
Suppresor of cytokine signalling	GL276173.1	6	2067942 to 2067466	ATGGGACAGCGTTTTGCTAGTCTCAGGGAATTCTTCAGAATGGACAGTGAAAATCATTCTCTAGAAGGATATCCTGAGTCGATCCGGCGTTCATCCATAGACACGCTGGATCGAAACAAAGCCGATAACCTAGAGAACGGAGAGAATAACGGAAACTTACCTGCCGTAAATTCTAATGTGATTCAGAATAGGAATAAGTCAGAGGATAATTTAGACAATGAACAGTTGAATCAGGATTTAGATAATCACAATTCCAGATTTGAGTCTATATATAGCCATCCGATAGATGGTCAAGAATCAAAACAATGCTTTAGTAATGGAAATTTTATTGCTGGTGAACAAGAATCATTCAAGCCACAAGAAGCTTGCTGTAGTAATTCTGGAAGTAGCAATACCAGT…	477	0	98.3	1584
Survivin	GL275446.1	185	129383 to 130101	AGGTTCGGACCAACGTGCAGGTCAATCTGGAAGCCGAAGCGATGACAAATCTCATCTATATTGGGCCAAAGGCACTGGTTTTGGCACTGGTTCGACGCAGCAGTCTTGGAACGTCGAACAAGCTTTAATGCGACAGCGTTCTGAAGAAGAACACGTAACCATTCTACTGCAGGTGCTTGCAAGCTATATTGGGCCAGGCGATCAACCTCAGAAGGAACTACCAGCTGCTTTTACAGAGTTGCTGTCGCGATCTTGTTTGTTGCCTGCTCTGTCTTCATATCTACGCAACGACTCCGTCCTTGATATGGCACGCCACATACCACTCTACCGCGCTGTACTCCAGTTACTGCGTGCAATGGCTAATTGCAGTCAATTGGCGCCGTTGTTGTTACCGAGGAG…	719	0	99	14067
Tab2	GL277646.1	11	592141 to 593928	TCACCTGGACAAATTATGGACTCGTGCCATCGGCTATCACGCGTGCAGATACATATACCGCATTGCGTGCCGCTGCCACGCGCCGGAAGATATTTACGCATTCCTGACCCACGCCGCGAGCTATACATAGAGTAGTCCGGTGCCGAGTACGTAGAGTCTTTCCTAGTTCGTATTGCGATCTTCTACCCGCCTGAAATGCCGTTGATGCTCTCTGTCTCAGTTTCCCTAACTAAATGTATTTATCGGAATATTACACCTCAGTCAGAGCAATGTCTAAGAATAGTACCATTGCAATGCAAACTGTGTGCCTTATTCATNNNNGTCGCCAATTTTGCAGTTGAAGATCAATTCAAACCGCTGGTGTTGGATCAATTAATCAGAAAGGAAAGAATGACCAAA…	1788	0	95.6	4577
Tep3	GL274622.1	3	4683 to 4184	ATTCAGCGAGGCGAGCGCGAGTATTTTACGAACCAAAGATGACGACGCTCTGCGATATTTGCGAGGACGAGCAATGCGGCGACGTTTGCAGCATAAAGGCCGGCAAGCGCGAAGACGGAACCTTGCCATCTGTCTCTTCCAGCTCAACAACTCTCGGGAACTTCGCGCTTATCCTCGCGTGCGCTTATTATATCGCCCTGAACTCTCGCCGTTAGGTTCTGTTAATTCAGAAGTCGCGAAAATTTTTAATACAAATCAAAATTGTNNNNNNNNNNNNNNNNNNNNNNNAAATTATTATGAAAATCGAATATCTGGACGATTTCAAAAATTTTCTTCTAAAAAAATATGTATATTTTTATATTATTGTTGAGGGTATTATATTTTGTTGTACGCGACATA…	500	0	95.4	4776
TNF receptor associated Factor	GL277921.1	31	1196995 to 1197576	AGAAGCACGTGGGCACCTGTGGCTACGAGCCGCTCTACTGCGAGAACAAGTGCGGCATGAAGGTGCAGCGTCGCCACCTGAGCCAACACAAGCTCGGAGAGTGCGCGAAACGGCTGATGGCCTGCCGCTACTGCAACAAGGAGTTCGTCTTCGACACCCTGTCGGCGCATCACGCCAAGTGCGGCCGCTTCCCCGTGGCCTGCCCTCACCGCTGCGAGACCGCCGTGCTGCCCCGCGAGGACCTCGAGGTCCACCTCAAGGACCACTGCACCACCCACCTGCTCTCCTGCTCGTTCAAGGAGGCTGGCTGCAGATTCAAGGGCAACCGCTTCTCCCTGGACAAGCACATGGAGGAGTCGACCAAGACCCACCTGAGCCTCGTGTGCAGCGTCGTCTCGA…	582	0	99.1	1911
Toll	GL275593.1	5	69857 to 69145	AGGACTTCCTAACTTGAAGCGCTTGGAGCTGAAAAATACGAGCATCGCCGAGATCCCGCAAGGTTTCTTCGACAATTCTAGTTCTCTGAGGACGCTCGAGCTCAACGGCAACAAACTCGAGTCTCTGGCACCAGGTATCTTCGACAGGCTCAAGCAGATCGACTTGTTGAATCTTGGGCAGAACAACTTGCACGAGTTGAAGCCTGACGTGTTCCGCAACCTACAAAATCTCACTGCCCTCGACATCCAGCTGAACAACCTTAAAACTCTTCCGGCGAATATTTTCGCTGATTTAAAGAGCCTGGAGGCCATCGAGTTTGGCGGCAACAACTTCACCTCATTGCCTGCCGATCTATTTCAATACAATTCAGAACTCAAAATTGTCAACCACTCAAACAA…	713	0	94.8	3039
Toll	GL277224.1	8	743086 to 744080	AGATTTTAAACCTCCATGACAACAAACTGACATCTATGAACTCCGAAGTCCTGAGGAAGCTGGCCAACGATTCTATGATCTCGCAACTCACACTGCGAGGCAATCCATGGATCTGCGACTGCTCATCTAATGATCTGCTCTCCTATGTTCGGTCTAGCTTCAAGCAGCTTCCCGACTTGCTGAACATCACTTGCCGAAATTCCAACGCCTCTCTGTCAAGCCTCTCGCCCGGCGAGCTCTGTCCTACATCGAACCGTTTGATCATCATGATCTACTTGATCATCTGTCTATTCGCTCTTTTCCTAGGCTGCGCCTCAGCCTTGTACTACCAGTTTCAGGAGCGAATCAAGGTCTGGCTCTACGCGAAGAACCTGTGCCTGTGCCTTGTGACGGACGACG…	995	0	98.9	3222
Toll	GL275775.1	186	135767 to 139477	ATGCAGGCCAGTAATCCGGCCTTCCTCGCGATCCTCCTAGGCACGATGTTCTGCGTGCTCGGGGCCTCGCTGAGCCGCGCGCTCCGCTACAAGGCCCCGGACGAGTGCGAGTGGCTGGCCGAGGGCAACGTCGAAGAGGTCGTTTCCCTCGTCTGCCGCCTTAGGACCATTAACAGCGAGCTCGAGAACACCAACTTTAGCGTGATCCAGCCACAACACACGGTGCGGCTCCGGCTCGAGTGCAGCGACGCGCTCTTCTACCAGAGCTCGCTGAGCGCGGGCAGCTTCAGGCCCCTGGTCGAGCTGCGCGAGCTCGTCATCGAGTACTGCAAGATCGCCAACCTCTCGGACGATGCGTTCCGCGGGCTCCGGGAGCTTAGGAACTTGACGGTGCGCACC…	3711	0	97.9	3711
Toll	GL274502.1	233	37653 to 41707	CTGCTGCTGCTGCTGCAGGCCTCGGGCCTCGCGCGCGCCCGAAGCATCANCAGCCGCGAGGCCCCGCGCGGCTGCAGCTGGCGCCGCGACAACACCTCCGAGGACGCGCCCGCGCACCAGAGCGGCCTCCTCTGCCGGGTGCGCAACATCGCCAGCGCGGCCAGCCTCCTCGGCAACCTCTCGGGCCTGCAGGCCGAGAGCGTGAGCTCGCTGCAGCTCGAGTGCGGCGAGCCGCTCCACTACGAGAGCCAGTTCGAGCCGATCGGCACCGGCTTCCTCTCCGCGCTGCCCCGGCTCGAGCGGCTCGAGCTCGAGCACTGCCGGCTGCGCAACCTGCCCGCCGGCGCGTTCGCCACGGCACCCGCGCTGCGCCGACTCGCCATCCGCGCCCCCGGCGCC…	4074	0	98.1	4116
Toll 6	GL274950.1	14	807656 to 809479	GAGTWRGYGGGCGSCGNNNNNNNNNNNNNNNNNNNNNNNNNNAAGWRMKGSYGRTGSYCCRYGRYGRNTRTKCTSCGARAYCNNNNNNNNNNNNNNNNNNNNNNNNNNNNNNNNNNNNNNNAGYKTGWARRWKTTRACGWKSCGCMYKTRKMRCKMGRRRRACTWRYGRYGCMGCKCGWSKSYGKYYGSYMKSGCRYAKCGCRRCCGCNNNNNNNNNNNNNNNNNNNNNNNNCGCMGRRWGMCGKMGRTRYGYASRYAKRRCCYSMGCTCKASRTNNNNNNNNNNMTCGGSGCYSRYGRKYCNNNNNNNNNNNNNNNNNNNNNNNNNNNNNNNNNNNNNCARKGSCTCGYGCAGNNNNNNGCRRAAYYSRMWRMKCGACCRCNNNNYCGGTYWSSARKR…	3525	0	96.7	5836
Toll interacting Protein	GL276169.1	66	104726 to 104969	GAAGAATGGAGAAAGCGAGCATTCCTTGGGCCTCTACCACCAAGTTTTTTAAGGATAGAGAACACATGGAATGGAAATCAGCAAGAAGAAGCAGATCGACAGGCTGCTTTTGNCTTACAACAAATGCAGAATCAAACAATGTCGTTAATNGGCAGACTGACAATAACAGTAGTGCAGGCAAAACTTATAAAAAATTATGGATTTACCAACATGGACCCCTATGTTCGATTGCGAGTTGGTCACACAATTTATGAAACACACACAGACAGGAAAGGTGGAAAAAATCCACACTGGAACAAAGTCATTCAAGTCTTCCTACCTCCTGGAGTCAACAAAATATACGTAGAAATTTATGACGAATGCTCTTTCACAATGGATGAATTGATTGCATGGGGTCAC…	939	8.76e-124	98.4	968
Transcription factor Coe 3	GL277768.1	1	5006879 to 5006415	GTTGGCATGGTGCAGGAGCCTCGCGACGGCGCAGCGGCCAACTAACGGTCGCGGCTGCGTTGGCAGCAACCGACAGCAGCTGCTGCAGCACCACCAGCAAGGCGCCGGCACGGTCGCGACATCACCCGAGGGCTACGCGCCGTACGGCCTCACGACGCGGTCCGACGAGTGGAACAGCCTCCTGCCCAGCTCCACGATCGTGGGTGCTGGCGGGTCGCCATGGCTGGGACTGGGAGCCGCGGGAGGCGGCACCGGGAGCACCGCCGGAGCAGGTGGCAGTCCGGTCGAACTGGAGGGACACTGGGGCCGAAAGCTGTACGGGGCCAGCGTGGCGCCACCGCCACCACCGCCCCATCACCACCCCCGGGCGCCTCTGGTCTTCGCGCCCCAGGACATGAG…	465	0	98.9	2604
Transmembrane protease| serine	GL275162.1	4	3278814 to 3279059	AGACCAAGGCCGAGAAGCTGCCGAAGGCGACGCAGACGAACCTGCCGCCGCCGCTGAGCTCGATATGCAGCCCCGCGCCGAAGCCCATGAACGCCCGACAGGACAGCAACGTCTCCTCCGACAGCTTCAGCCAGACCAGCTCGCCCAGCTACACCAGCAAGACCATGGAGGCGCCTCTGCTGCCGCACAAGCACGTCAACGGAAAAGTCCCAGGCAAGCCTTCACTCGGCCTTCGCGAGCCTCGAC	246	1.89e-124	98.4	2958
Trypsin	GL274950.1	14	3340268 to 3341667	AATTTCGAATTTTTTATACAAAAATTACAATATATCCTAATACAGTCGATAATTCATCGCCCATCGTCAGAAATATTTACACAATATTGCACTATAGGAGCCACTTATTGAATGCGACGATCTCACACAACCGACAGACAAACACTCGAGCAGTCGGTCGATCTAAACATGATAGATAACACACAAAAGCAGTGCTAGTAGCGCTGCGATCGGCGTGAGARAGGCAGCGTTTCCACCGAACGGATTAGTGCGAACGGKGAAGTTCTGCGTCATGTTCACGTACTTCTTGATCCAAGGCGAGTARACTCTGACATCGGCGTARARACCGGGCAGTCCCGGCCAGGCGCAGCCCTCGCCGCCGGATACGACACCAGTGAGGTAGCCCTTGCACATCATGCC…	1577			1577
Trypsin	GL277752.1	21	164888 to 165646	GGTAGTCCGAGGCCCATGCCTCCACATACCATAGTGGGCATAAATCCATTCACGCCCCAGGGTCGCATCGTGGGCGGACGGGAAACCACAATTGAAGAGCATCCATGGCAAGTGTCTCTCCAGGTCTCCGGTTTCCACTTCTGCGGTGGCAGTATCATCTCCGACAATGTCATCCTTACAGCCGGTCACTGCACAGTTAGCTATCCAGCTCAGTCTATAACAGTCAGAGTCGGCAGTTCCAGAACTGCCAATGGTGGAGCACTTCACCAAGTCAACGAGATTGTTCGCCACGAGAACTTTAAAACCAATATGTATGGCATACCGGAAAACGATGTTGCTCTGCTTAAGCTCTCGTCAAGCATTCAATTAGGCAAAACGAGCAAGCCGATACCACTGTTC…	759	0	98.6	804
Trypsin	GL274082.1	102	387362 to 387664	CAGCAAGGCGGCGCGAGCACGAACGACCTGATGGCGACGACGGTGCCGATAGTCGATCGTCTCGTCTGTAGCAAGACCTACAAATCGGTCAGGCCCATAACCGATCGCATGATCTGCGCGGGGCAGCTGAAGGTCGGCGGCAAGGACTCCTGCCAGGGCGACTCGGGCGGTCCCCTCAGCGCCAACAACACTCTCTACGGCATCGTGTCCTGGGGCTACGGTTGCGCGCAGCCCAAATTCCCGGGCGTCTACAGCAACGTCGCCTACCTCCGGCCCTGGATCACCAGCGTCACCGGCGTCTGA	303	4.17e-131	97.4	741
Trypsin like Serine Protease	GL276708.1	108	81753 to 81011	CAGGGAGATTCAGGTGGTCCGCTGACGATGTCCGTCGAGGGTCGACACGTGCTGATCGGCCTCGTTTCCTGGGGAATAGGTTGCGGTCGCGAGCACTTACCCGGTGTCTACACCAACATCCAGAAGTTCGTACCCTGGATTGATAAGGTCATGAGCTAAAGACTTTTAATCGTGCAATGTATTATCTCAGTGACGATGCCTACTATGGACAATCTTTCAAGGTGTTTATTCGCGTGTTCACTATGTGTATGATATTTATTTCTGTGAAGCTGTCGACATTTATTAAATGCGACAGTAAATTGAAATAGTTCGTCATCATCAACGTCGGATTCGATCCGAAAATTAAAGCAAAGGGGCGGTCCTCAA-GTTACCAAAGGTTTTTATCTACTCATTTTTTT…	747	0	97.5	1710
Tube Protein	GL276749.1	7	2629226 to 2629562	TGTTTGTTTTACATTGTTGTATTGAACTCAACTCATACTAACTCTTGATTTGATTGTTAACAAGATTGACAGAAATGGCCACTCCAGACACAGAAATTCGCAAGCTTCAACCAATCGAGCTGTGCACGTTGGCACACATCTTAAATCAAGCTGATGCCTGGAAAACACTGATGGCCGCAATTCCATCGCCTGACAGTCCGAACCACAGTTTATTCAATCATGAACATTTCAAAATGATCGAGCAGGCGATTCATCAGCAGCAACGAAATGGAGCCGAAATTTTTTTATCGGAGTGGGGTACACTAGGTAAACAACGACCTACATGTCGTTCTATGCTTGATCTTCTAGTGAAGGCTGAACTGTTCAGAGCTGCAGATTATTTAGCAGTGGATATCCTGA…	833	2.13e-159	94.7	992
Turtle Protein	GL275014.1	24	978931 to 978233	ACCTAGAAAAAGCCGAGTACCAGGTTTGAGTCTGCTGCGCGAGCTGATCAGCCCGGCGACGCCCGACCTGGCGCGCCGCTGCCGGCCACTGGGCAAGATCTCCCGCGCCGCGGACGGGCGCTTTGTCATCGCGGACTCGGTCATGTCCTCGGCCAACAACAGCATCCTCGACGCCTCGAGCAGCGACGACGGCGGCTTCCTGCCCAAGCAGCACCAGCGCCTCAAGTCCTCCTGGCGCCGGCCCCTCGTCGGCACCAGCCAGATGAGTCTACGCTCCGAGGGCAGCGGACTCTCCAACCTGCAGCAGCAGCCCGTCCAGGTCGGCCAGGTCGTTCTGCCCGGGCATCAACTGCTGGCCTCCGTGGTTGGCCCGTCGCCGCAGCTGGCGTCGCCCGAACT…	768	0	98.3	4209
Tyrosine hydroxylase	GL277784.1	181	227326 to 227778	GATTTCGGCCTGACGGAAGAAGAACTGGTGCTCGCGCGCTCCATCGCCGAGAACCCCGATGACCAGTCGGTGCAGACTGCCGCCCTGGTGTTGCGGCTCCGCGAGGGTATGTCCTCGCTGCCGCGCATCCTCAAGACAATTGAGAACTTTAAGGGCCAGGTGGCCCACGTCGAAACCCGTCCCTCGAAGAAGGAGGGCCAGTTCGACGTGCTGGTCAAGGTGAACATGAGCCGCCACAACCTGTCGTCTCTCATCAGAAACCTGAGACAGGGTTCGTCACTCGGTGGACTCACCCTCCTGGCGGAGGACACCAACGCCGTGACCGTCAAGGACCCCTGGTTCCCGCGTCACGCCTCCGACCTGGACAACTGCAACCATCTGATGACCAAGTACGAGCCC…	453	0	97.6	1707
Ubiquitin conjugate Enzyme E2	GL275014.1	24	2371457 to 2371701	ATGGCTGCATTACCACGCAGAATCATCAAAGAGACGCAGAGGCTTATGCAGGAGCCAGTGCCTGGGATCAGTGCAGTGCCCGATGACACTAATGCCAGATACTTTCATGTGATAGTTACGGGTCCCGAGGACTCACCTTTTGAAGGTGGACTCTTCAAACTAGAACTGTTTTTACCAGAGGATTATCCCATGTCTGCACCAAAAGTTAGATTTATTACAAAAATCTATCATCCAAACATCGACAG	245	1.07e-124	98.4	459
Ubiquitin-conjugate enzyme rad6	GL274210.1	22	1547182 to 1547509	GTCGAATCGAAGGTGGTGCGCGAGTGAACTGTTGCAGCTCCGGGAACGGTACACACTACGCTACGGATATAGCGGCTCGTAGCACAAAGACGGAAGGAGTCGTCGTCGTCGTCCATACTCCATAGTGCGCGAGAGAAAGAGAGCTCTGCTCGGCGCGCGCACCAACCGCTCTACCTTCCTTTTCCTCTGCTTCATCTGTGTTCATCGCCCGGGACGTCGTCGTGTGAGACAGAGGCTCACCAGCCAGCAGCGAGTCCGAGGAATGTCGACCCCTGCGAGAAGGCGGCTCATGAGGGACTTCAAGAGGTTACAGGAAGACCCACCCACTGGAGTCTCGGGGGCGCCGACCGACAACAATATTATGATATGGAATGCTGTTATATTTGGACCACATGACAC…	917	1.25e-177	99.7	926
Uricase	GL277538.1	9	3758928 to 3758499	CTCGAAAATAGCAGCGATCAATTCGAGCTCGGCGCCTACGGCTACGGCAAGAACAACGTGAAGCTTCTCTACGTCCGACGGGAAAACGCCCTGCGCCACGAGATCCGCGAGTACGAGATCGACGTGCATCTGCGTCTCAGCACACAGAAGGATTACCTGGTGGGCGACAACCGGGACATCATAGCGACCGACAGCCAGAAAAACACCGTTTACCTGATGGCTAAAAAACACGGTGTCAACTCGCCCGAGGAATTCGCCATACTTCTGTGCTCGCACTTCCTCTACCAGTACAGACACGTCGAGGAGGTGAACGTCAGGGTCGAGGAGTATCCCTGGAGCAGACACGAGGTCAACGGTGTCGCCCACAATCACGCGTTCGTGTTCACGCCCACCGCTACG…	430	0	96.5	1164
VEGFR-Aspliceform A	GL274210.1	22	126690 to 126259	GCTAATGCTGCACACTCCGACGGCGAAGACGCCCCTATGCTGAAGAAAACCAAGGAAGAGCCAGAACAGGACGAGGATAATTATCTGAAACCCATCGACGTTCACAAGAAGCGAGAAGAGTTCATGCGACAACGAGAAGCCGAAAAGAAGAAAGAAAGGGAACGCAGTGGTAGGAGATCCACCGATAGGGATTCAGGATACTGCAACACTCCAAAGAATTTGGAGTTGGTTGACGTCAAAGTCGAAGTGCCGAATGAGAAAGCTCCGAGTTGGAGGAGTGCGGACGACACGGATACACCGTCTGTGATCATAAGGACACAGGACAATTACGTGAACATGCCGAAGCAGAAAAAAGACGTGCCCGACAGTTTTATGAACCCGAGTTACATTTTCGTAGAG…	432	0	99.5	3885
not on current assembly	GL277538.1		1 to 1113	ATGACACCCAACGTTGTCTTCCCTCTCATAGTAATAATTACACTGTGCGGTAGGGCATCATTTGCCAAAACCCTTCAGTGCGTGTGCATTAATTACGACGAGTGTAATTACGACTACACCCCAAAGGGACACAGTAGCGACTATCATGAGATTAAAACTTAAGAGGACGGCGAACAACGTCCGTCATGCCACAACCCGATAGACGTCTGCTGTGATCTGAACAAAGGCAACATCAACACCGACAACTACTACCACAATAACTCCACCACCGCGAAACCGTCCACTAAAAAGTGGTCTTGCGGCTATCGCGGCGGAAAGATCGACGACAGCAGTTGCGGCACCAATGCCAACGCGGAACGCAAAAGACTGCTACGACTCACCGGCCAGTTACCATTGCGG…	1084	6.88e-92	97.6	1113
serine protease 96	GL274073.1		1 to 1068	ACACAATCGTTGTGGTGGAATTTCTCAAGAATTCGTTGACGGTTTTCTGCTATATCTATAAGCGAAAGGTCCCATACACACCAGACATGAAGTGTTTGTTGATCTTTGCTATGTGCTGTTTGGCACTAGGTAATAGCTAAAAGCCAACAGTTCTGGTTCCCCATCATCCAGTATTATCCCATTGATGGTAACTTTGATTATCCTTCAATTGTACCAATACAACCAATACTGCCAATGCAACCAATAGTTCCGAGCACTCCGAGATATGCCGATAACGGCGAGTATCCATACCAGGTCGCCATTCAGGTAGACGGAAACGCCCATTGTGGCGGTACTTTGATCAGCAAGAAGCACGTGCTCACAGCTGCTCACTGCACCCACGATTGGATTCAGCAAGGA…	1077	0	97.6	1068
serine protease homolog 29	GL277784.1		1 to 1092	ATATTCAATGCATATGCAGTGGTTGATTTTTACTTATTCACCTGCTCGTGCAAGTTCATAAAAGCTCTCTATAGTTTGTAATCCATTAGCATGGAGAAATTATTATTTCTTCTTCTACTTAATGGTGTATTTTGTTTTCATCTAGGTGATGATGACGAAGCACCAGAGGATGTGGTATTTGGTGGATGATCCAGATGCAATGAAAAGTGGTATTGTTGGAGGAGACTACATCGAAATAGATGAAGCGCCTTACACGGGGCTCAAATTCTCGAAAATGGAAAATACATCTGTGGAGCAGTAATTATTTCGGAATATTGGTTACTTACTGCTGCTCATTGTGTATCTAACATTCAAACGCCATCTATTATTACTGGATCTAGTTTTCGACAGAGAGGAGGA…	1098	0	97.3	1112
serine protease 33	GL277784.1		1 to 1432	AAAGTATGTTCTGTCACAGCCAAACAATCATGGAGAAAATTTTGTGTTTTATACTGTCACTTGCAATTGTCAATTGTTTTGAATTAGGTAGATAAGGATGATGCATTAAAAAGTGGTATTGTAGGAGGAGAATTTACTGAAATAAACACGGTGCCATACTTGGCTCAAATTCTTAAAGATGGTGACCACGTTTGTGGTTCGGCGATTGTCTCCGAATATTGGATCGTTACTGCTGCTCATTGTTTAGAAGATGACGGAGAACTGTCATCAGATACTGAAAAATGGACTGTTATTACTGGATCAAGTGTTCGTTCAAAAGGAGGACATCTTCACAGAGTCAAAAAAATCATCGCACACGAAAATTATGATAGTTTAACGAGTGACAACGATATCGCTTTG…	1408	0	96.2	1439
serine protease 97	GL274073.1		1 to 1241	ACAATCGTTGCGGTGGAATTCCTCAGCACTTTGTCGACGGCTTTCTGCTACATAAGCACTAGATTCAATACACATCAGTCATGAGGCTTTTCTTGATCTTAGCTTTGTGCTGCTTCGCACTGGGTAAGCTAAAAGCCAAATCATTGGGTATTATCCTGGAATCAGACAACCAATACAGCCCATACAACCAATACAGCCCATACAACCCATACAACCAGTGCAACCAGTAGGCCAGGGCTATCCTAGATTTGAAGCTTATGCCGGCGAGTATCCATACCAGGTNNGCNNNNNNNNNNNACGGAAACGCCCATTGTGGCGGTACTTTGATCAGTAAGAAACATGTTCTCACGGCTGCTCACTGCACCCACGATTGGATTATGCAAAGAANNNACAAGAGAA…	1252	0	97.6	1244
serine protease 50	GL274356.1		1 to 859	ATTCTCGCTGAGATGTCGTTAAAACTCGTTCTCCTAACCAGCCTCCTGGCAGTCGCCCAAGCGACTCCCTTTCTCGGATTCGACGCCCGGATCACCGGTGGTCAAGCCGCCCGGAAGGCCGAGTTTCCTTACCTGGTCTCTCTGCAGCGGGGAGATCCGCCGAAGGTCGGCCACTTCTGCGCCGGTAGCATCATCAAGCCCAAGTGGATCTTGACAGCTGGTCACTGCGTCACGGTTATACCAGCTGGCGGTACTCTGATCATCAAGGCTGGCAAATATCTGATCAAGCAAGTCGAGAAGGACGAGCAGGTCGTCGAGGTCAACCGGACCATCGTGCACGAGAAGTACCCGGGGAAACGTGGCCCCGAACGACATAGCGCTGATAAAGCTCAAGACGGC…	860	2.15e-146	98.4	887
serine protease homolog 42	GL274014.1		1 to 1375	GATTTAGTACGCAAGTGTTGAAAACTGACGCTGCCGAGAAGGCGGACACGTCGAGTTTTCCCCTGTAGCCATGGCGCAGGTCTGCTGCCTGTTCGGCCTGCTGCTGCTGCTGTTCAGCTTCGAGGCGTCCGATGCTGTCGATGCCAACTGCGACTTTCTGCAGAAGCTCGAGCTCGGCAAGACCTACTTCATAACGAATCCGAACTATCCGAACAACTACACGGCATCTCGCTCTTGCCGCTGGCACGCCACTAGTGACACTCGAGTTAGAATCACCTGCAACGAGTTCAACATCCCAGCTGACTAAAATAGTAGGCGGCCGAGAAACTGGCATCAACGAGTACCCTATGATGGCGGGAATCATCAACGTTCCCATCCAGCAAGTCTATTGTGGCGGTA…	1175	1.25e-101	98.8	1393
serine protease 4	GL277752.1		1 to 1036	ATAACTGTGATTGCTGCGATTCGATTGAGATGCTTTCCCTTCTGACGTTCGTCGCTCTCGTGGCTGCTGCTAACGGCGGATCCGCTCTACAAAAGAAATCAGATCTTTCCAAACGGCCGCATCGTGGGGGGCGAGAACGCAGTGATCGAGACCTACCCCTACCAAATCTCGCTGGAGCTATATGGACGTCACAATTGCGGCGGTTCAATCGTTTCCGAGTATTACATCGTAACTGCAGGCCATTGCGTCACTGGACCGGCAGAAGATCTAACAATTCGCGCCGGTAGCTCGATTCTGGGCAAGGGTGGTAGCGTACACCTAGTCGACAAGATCGTCCGCCACGAAAAGTACGCATTGAACGAGTCCGGCATCCCTATACACGATGTCGCTGTGCTTCGC…	1037	0	97.4	1053
hypothetical protein	GL274622.1		1 to 1350	GGTTCATTCCTTTCTCGTATTTCCGATTCGCAAGATATCTCGACAGTCCGAGAGGAGACTTTGCCGCTGGACACTTCACTGCTGGCTGAGACCGAGCGGAGCTTGAAGCAACTTGGAGGATCGTCCCTCTGACTGTCTTTTACTTGTCGCTTTGCTGATTATGATCGAGTAGCATGAAGGCTGCTTTCTTGGTGCTTTTGGGCCTCGTCGCCGTGGCGACGGCTCAGCGACGACTCGCCCTTCCCGACCCACGAAGCTGCGCCAGCCGTGTGCGACACGCTTCGTACAGGGATGCGAGAGGCGTAGCCCACTCGTACTTCTTCAGCTGGGAGCATCAGCCGACGAGGAACCTCGAGGTCGACTGGCTCGACGCCAGGAACATCTGCAGGCGCCACTGCA…	1310	2.73e-99	98.1	1469
hexamerin 109	GL274622.1		1 to 2988	ATGCGCTTCAGCATAGTGTTCTTGGCTTTGTTCGCCCTTGCGGCAGCAATCCCCACCACACCGAAACTCCACGCAGGCCTTCTCCAGCGCTGTCATCCAGCGCCCGGACACGAAAGGAGTCATCCTTCCCCCAGCGTACGAAGTCTACCCACACTACTTCTTCGACGCCAGGATTATCCAGAAGGTGCAGGACTACATCAACCAGTACGGCTACGAGCATCACGGCGAGGGCGAACAGCACCACGAGCACGTTCACCACATCCACGTCAACTACACCGCTTACCTCCCCTTCGGAGAGAACCAGATCGCCTACTTCACTGAGGACATCGGTCTGAGCGCCTACTACTCCTACGTCCACCTGTCCAGCTACATCTTGCACCACGCCACCACGGACACGTC…	2606	0	98.7	2988
serine protease 10	GL277752.1		1 to 1282	CGCCAACATGCTGTCGTCCGTTCTAGTTCTCGCTGTCTCAGCTCTAGTGCTTGTTGTTGGCTGACCCGGTGGCTCTGCCGTTAGCTCTGCGTAACCAGCTGAACCCGTTTACACCGCAGGGTCGCATAGTCGGTGGTAAGGATGTGAAGATCGAGGAGGTTCCTTACCAGGTGCTACTCGAGGCTAGAGGTTTTGGTTTCTGCGGTGGAAGTATCATCGCCGAGGACTGGATTCTGACCGCCGGTCACTGCATCGTCTATTCCGACGACTGGGTCAGTGTTCGCGCTGGAACTACGAAGCGTAGCAGTGGTGGAAGTCTTCATAAGGTCGTCAAGTCGATTAGGCATGAGGAGTATGGAGTCAATCGTCATGGGATACCCATTAACGACATCGCTCTGC…	1281	0	98.6	1282
serine protease 102	GL275014.1		1 to 1015	AGTCTTCGAAATGACTTTGAAGCTTATCGTACTCGCCTGCCTTTTGGCCGTTGCACACTCACGTGTGTGCTTAATACATGGCATAAAAATCCGTTAATTGGTGCCCGTATTTTGGGCGGCCGTGATGCAAAACCCGGTGAGTTTCCTCATCAGGTTTCCCTCCAATGGGGCTCTGGGGGAAATTTGGAACACTTTTGCGGCGGTAGTATACTGACTGAGCGCTGGATTCTGACGGCGGTACATTGCCTGGAGGCCATAGATCGAATTAATGAAAGCGGTATCAAAGGTTACTTTGTCGTCAAAGCCGGCAAGCAAGACCTCAATCGTGTTGAGGACACAGAACAAACTTCCATCGTAGAAAAGTATTTCAAGAATTGGGATTACACCGGAGTTGGGAGA…	1016	4.09e-163	97.8	1028
serine protease 11	GL277752.1		1 to 920	AAGTGTTCTACAACACAACGGTACAAGCAACATGTTGGGAATAATCGTTCTATGCGTGGCTTTCGTTTTGGCTAGTGGGGGGACCCTATCCCGGCGTCATCCATAGCGAGACCAGCTATGGATCCCTTCTATCCGCAGGGTCGCATAGTTGGCGGTCGAGAGACAACGATTGAAGAACACCCCTGGCAGGTGTCTCTCCAGGTCTTGGGCTTTCACTTTTGCGGTGGAAGCATCATCTCTGAGGATACGATTTTAACGGCTGGTCACTGTACCGTCAGCTATCCAGCTTCGATGATGACAGTTAGACTTGGCAGTTCCAGAACCGACAGAGGAGGTGCCCTGCACGAAGTCCGCGAAATCGTACGCCACGAGAACTACAAAACCAACATCTTGGGTATT…	921	0	97.6	924
serine protease 110	GL277752.1		3 to 2076	AGCGCGCGCGGAGCTGAGAGTCAGTAGCCGATGCCGCCGCGGAGCTGCTGCAGCAGCGCGCGTCTTCCAACGAGATCAACGACGAGGACGAGCTGATGCAGACGGCTTTGAATGCGTTCGCCGTCATGAGCAGGCGACGACGATGCGATCATGCAATCCGAGGATGATCGCCGCCGGCGGTTACTGTTCTTACCTTTTCCTCCTGATTCTGGGAATCGCCGCTCTGGCGACGGCTTCTTCCGCAGAAGACACAAAGCCGGAATCTTGACAAGACGCGCGCTTTGGACCACCGATTGCCGCAAGCTCACAAGCATCAGCAGAGACAGAAGTCGGGCAGATTTTCATTGAGAAAGATTCAGCGGCACTAGTCGGATTCACAAGCTGGAGCGACTGGTCGTT…	2083	0	98.5	2076
serine protease 115	GL276749.1		1 to 1232	GTCGGCCGATCGCGAGATAAGGCCGTAGATCGAAGCTTTTTACCTTCGCTATTATAGCTTACGCGTGAATTTGGTGGTCGATCGTAACTTTTCTGTGGATCCGTTGAGTCTATAGTTGCTATAATGCGATTTTGGCAGTTTCTCGTCGTCGTCGCTTTCTCGATGGTATCGGGGGCGATGAGTCAGGAACTCGCGCGACATCGTCGACGACGACACCAACAGCACGAGAAACTTTCTCAGTTTCTTAAAGAACAAACCGGTAACACCACCGCCAAGTCCATGCTACTGCAGGCTGCGGTTTGAGAAACGAAGAAAGCCGCATAGTCGGCGGCCAAACGACTCTCGTCAACGAATTCCCCTGGCAGGTCAGACTGTCTTACATGAACAAGTTCTACTGCG…	1252	1.84e-107	99	1255
serine protease 120	GL275593.1		7 to 931	AACCGAACGTTCGCATACCGAGTACACAGCATTAGCCTCGAACATGGAGTCACTTTCCTCGCGCAGATTCGCGCTTACTTTAGGTTTATTCTGTGCTACACTGTGTTTTGCTGCTGTCTCGGCGGGATTCAACAACACGGCCATATCGGCGGTCGTCGGTACTAATCACCTCGACAAGGGCGGCGATAAGTATCAGTCGAAGCGCATCATTGCCCACCCGATGTACAGCTCGCTGATGATCCGCAACGACATCGGCCTGATCGAGCTCGACAAGGACATCGTTTTCGGGGACAAGGTGCAGCCCGTCAAGCTCCCGGAGTCCGATTTCGACAAGGCCGACTATCCCGCCGAGCTGTCCGGCTGGGGAACCACTATATCCGGGATCGCCGCCAAACGAGC…	717	2.91e-72	97.1	988
serine protease 122	GL276859.1		68 to 1101	GTGTGATCGATGTATTGCGTCGAAACGGCCACATCAGTACCCGGGTAATAGGTGGTCACGACGCCAAACCCGGCGAGTTCCCTCACCAGGTGTCCCTGCAATTCGACATCCCGGAAGTCATGCCTTCGACCCACTTCTGCGGTGGTAGCATCCTGAACGAACACTGGATCCTGACGGCGGTGCATTGTCTGGAGGCCATGGACGAAATAGGTTACTTGGGTCACTTCGTCGTCAAGGCTGGTAAACAGAACATAAGTCGAGTCGAGGAGACCGAGCAAGTGTCCATCGTTGAGAAGTACTTCAAGCATGAGAATTACACGGGAACCGAGAAGAACCAGGTACCTCCGACATCGGCCTCATAAAGCTCAAGACAGCTCTGAAACTGAACGAGCGAGTGGC…	1033	1.7e-173	97.2	1114
serine protease 100	GL275014.1		1 to 814	ATGAAGCGTTGCGTACTCGTGCTCTCGGTTTTACCAGTGATCTTCGCCGCCTCGATAATTGAAAAAGTTGATCCAGAAGCGCCTTACCAGGCGAACTTAGTGATCGCGAGTCTTCTGAACGACGACGCGGAGAATTGCAGTGGTTCTATAATTCACAGGCGTTGGATCCTTACAGCTGCTCATTGTTTGGTGAGCCTGGTTTACCCGAGGTATCTCACCGTCACTGTGGGAACTCGCAAGTTTTCAGGCGATGGAGGAAAGCTTTACGAAGTCGAAACGCACATCACTCACAAGAACTGGGAACCTCAATCCGACAAACGACATAGCTCTGGTGAGATTGAGGAAGAATATCGTATTCGATGATAACACGCAGGTGATCCGATTGTCCAAGAACGACAC…	811	1.9e-91	97.4	814
serine protease 43	GL275360.1		1 to 915	GCAGTGATTACCGTAGTACAGAATGGAGAAGATCGTTTTCGTATTATTTGGCCTTTTGGCTTTAACACAAGGAGGAACTCCAACGGGCAGAGTAGTAAATGGTGAAGATGCTGAACTTGGTGACCGTCCATTCCAGGTAGGTGTCCCTACAAACCTATGCACACTTTTGTGGAGGATCTATTGTGAGTGAAAATTGGGTCGTTACAGCTGCTCACTGTGTCTACGGGTACATCTGCGTCCGGAGTAAATGTAGTTGTCGGAACAGTTAGCCTTAAAAACCCCCACAAGTCTCACCCAGCTGAAAAAATCATTGTTCATGAAGCTTACGCACCAGCTCAGTCCAACAGAAACGACATTGCTCTGATCAAGGTAGGTCTCTACACCTTTCGAGTTCTCCGA…	927	4.04e-137	97.5	915
serine protease 82	GL276859.1		1 to 1121	AACGCAGTGTCGAAAAAACTGCCGGACAGTTTTTACCTTCGCAACGATATGTGGAAGCAACTGTTGTTTTTAGTAATTCTCACGGTTACGCCCATCAAACGCATAGATGGGGAAATAACCACACCATTATTCCTGATGTGAGTAGTGACGCCACCACTGTTTCTGCTGTGAATAGTGATGATACCACTATTTTTACTGTGAATAGTACACCTGAACAACCGTCGAGGAATTTGACTGGCCGGATAGTCAATGGAACAGCGGCATATTTAGGTCAATTTCCTCAACAGGTAGGTTTCGCTGAGAAGAAGATATTCTCAAGCGCACTTCTGTGGTGGTAATATAATCACGCCAGAATGGATCCTCACTGCTGGGCATTGCATGTTTGCGATAAAAACCGGA…	1132	2.34e-73	98	1139
serine protease 123	GL275593.1		1 to 854	ACATTGTATATCGAGTATAACGACAAGTAACATTAAAAATAAAGCGCGCATTCAAATAAAATTTGTCACCATGAAGTCAAAGTACTGTCTCACAATTCTATTATGCATTTTTGTGTCAGCCCAAGGAGGCAAAATTATTTCACGCATCATAGGCGGCAATGACGCTCCTGCCGGGAAATATACCTACCAGGCATTTCTAAAAGTTGGAGACAGCTTTCAATGTGGAGCCTCCATCATTGGCAAACGTTACATATTGACTGCAGCTCACTGTGTTTCTGGGTCAAAAAACGAAAGAAATGAAAATCGTAGTAGGTACGATTTCACGACTTGATTATAAGAACGGAGTAGAGTATGGTGTGATTGGTTATGAAACGCATCCAGATTTTCGGGTACCCAAGC…	859	1.3e-74	99.1	911
serine protease 128	GL275593.1		1 to 755	GCTTAGTTCACTTTAATATTGATCAGCAGTAACATGAAGTCTTACGCGATACTCCTTTTAGTTTCGTTGGTAGCTGGTACCCATGGCTGGAGTCACCAGAGTGGTTGGTGGCTCGGATGCACCGGATGGAAAATACAAGTACCAGGCTTACTTGAAAGACAATCAAGGATTTCTCTGTGGAGCTTCGATAATTAGCAAACGATACTTGCTCAGCGCTGCTCATTGCTTCTTAGGGAGTTAATCCAGCTAACGTGAAAGCCGTAGTCGGTACCAACCTATTCATGAACGCTACTGCTGGTGATGAGTATCAAGCAGAATCATTTGTCGTTCACGAAGAGTATAGCAGACCAGGAGGCGATCACGGAGTTAACGACATAGCCGTAGTGCGAGTACGAAAAG…	760	2.27e-76	98.2	869
serine protease 133	GL275793.1		1 to 927	CGGACATCATCAGGATGAGTTTGGCAATCGCAGTCTGTCTGTGCTTCGGCGTTCTGGCCGGTGGTCTGAGCGGAGCAAAGCCCCAGACGCGGATAATCGGTGGCGAGACGGTCAACATCCAGGACTACCCTTACCAGATCTCGATGCGATGGACCTACGGTGTACCGAAACCGATGCACTTCTGTGGCGGTTCGATCGTCAGCCGTTACCACATCGTCACCGCGGCTCACTGCGTCGACAACAAACGCACGCCTGATATGCTCAGGTACATCAAGATCTACACCGGTACCAGCCGATCCGACTCTACCGGAGGTACCGGAAAGGCTCACACCGTCAAGAGTGTGCTCGTGCATCCGGGATACACTGGTGCCAGCACTACGTACCTCAACGACATTGCTA…	927	0	98.8	975
serine protease 135	GL275793.1		1 to 930	CACACTTGCAACAGGACCTACAAGCTTACCAAGAACGCGCTCATAGGGCCTCCAGGATGATCACGAAACTTCTCCCACTCATCTGCCTAATATTCCTGATCTCCATAGAATCAATGGAATGTCGACGCATAGTGGGCGGCAGCGATGGCAGAATAGACCAATTTCCATACCAAGTGTCGATCCGTCATTACAACGAGAGCCACTGCGGCGCAGCGATAATCGACGAATGGCACATTCTCACCGCGGCTCACTGTGTTGGTAGTGTACTCGTTCCACCCTTCGAAGGAGTCACCGTGCATACCGGTACCGATAGTATTTTAGAGGAAGGACACGTGCACCGGATTGCCAGAGTTGACGCTCATCCTGGATACGACAACTCGCCTGGGCAGAATAACGACA…	930	3.26e-134	97.9	943
serine protease 137	GL277768.1		6 to 841	GCGAGCATTTTCAATTATGAAAGTTCTCGTAAGCGTACTCCTGCTGTGCTGCGCAGTAGCCATCCATGGCTGCTCCTCGAGTTGTCGGAGGTAGCGATGCCCCCGATGGAAAATACCCTTACCAGGTGTCCCTGCAATCGTACGGCACGCATTTCTGCGGAGGTTCGATCCTCAACAAGCGCTGGATCCTGACTGCTGCTCACTGCCTCATATACACACAGCCCGAATCCATCGAAGTCCACGCTGGAACCAACAAGCTATCCGGTGGCAATGACCAGGTATACCAGGTCGATTACGCCACCTATCACAAGGAATTCAGCATGAAGCTCCTGACCCACGACATCGGTCTGATCCGCGTCAACAAGGACATCGTATACAACAAAAAGGTCCAGCCCATCA…	837	1.63e-99	97.6	884
serine protease 17	GL277752.1		1 to 869	ATATAGAGTAACAACATGTTGCGGGTGGCAGTACTAGCTTCAGCTTTGAGTTTAGTCGTTGGTGAGGGCGAGCCTATTTCTCGCCATGTCAAGCCCAACCCGTTCTTCCCTCAAGGCCGGATCGTCGGTGGTCGGGAGACTAGTATTGAGGAACATCCTTGGCAAGTATCCCTCCAGGCGTATGGATTCCACTTCTGTGGTGGCAGTATCATATCTGAGAGTATCATCTTGACGGCGGGTCACTGCGCCAGTTACTCACCCGATTTGATCACCATTCGAGTGGGCACCTCGATTATGGAATCCGGTGGTTCGGTGCATCAGGTTGCCCAGATCGTGCGACACGAGAAATTCGAGAAAACCAAGAGGGGTATACCCATCAACGACGTCGCAGTCCTCAAG…	875	0	98.3	869
serine protease 19	GL274339.1		33 to 1469	AGAAAGTTTAAACACTGTAACGTCACATCCAAATTGGAAACTTTTGAATTTTGATCAATGCGGATTATCGTATGCCGATCGTATCATTGGCGGTAAAAATGCGTCCATGGGATCCTACCCGTGGATCGCTAGGATTGGATATGTAAAAAAGGATGTACCGGAAGATGAAAGGGAAGTTACGTTTCGCTGCGGTGGTTCAGTCATCAGTGAATACTACATCATAACTGCTGCCCACTGCGTTACGAATTTATCTAACAACACGCTTGTTTCGAAGATTCGGCTAGGCGAGCACAATACGGATACAAATCCCGATTGTGAGAACTCGTTTTGCAACGATCCATACGAGGAATTCGAACCAGCCAAAATAATGTTTCACGAAAAATACGATACGCCTAAACT…	1469	0	99	1481
serine protease 38	GL276459.1		1 to 1412	GAGTGCCGCGAGAGATCTGTCGACGCGCGCGCGCGCGAGATGATCACGCCGAGACGACGAGGACGACGGGCCGCGGGATAGTACATCGCTTGAGGCCTCCGGAACTCTCTTCTCCGCCGCGTCTCGTCGCAGTTTTCTGAGCAAACCATGCGGACACGAGTGGTGCAGTTGTTGTGTCTGCTGCTGCTGCTGCTGCTGCTGCTCGGGAATTGCAGTGAGAAAAGTGCTGCTGCTACTCCTGCGGAATTCCGGAGGACGAGTAACCGCACGGGCCGGATATTCTTCGACGATCTGTTCGGCATCGACGTCGACATCCCGGGCCTGAGCGGCATCACCAGCGGTATCGGCGGCGGCAGCGGCAGCGGAGGCGACAGCGGCAACGCCATCGGCACCGATGAG…	1436	7.94e-107	98.6	1429
serine protease 47	GL273815.1		1 to 1057	ACAGTTATTATTATTATTGAGCAACCATGGCTTCGCTTATTATTCTCAGTTGCATCTTGGCTCTCACCAATGCCATTCCAAATTTCGTGCAAAGTCAACCATTGGCGGATCTACTTAAAATAAATCGAGTCATCGGAGGAAAGAATTGCGCGAAAGGCGAATTTCCTCATCAAGTAAGTTTGCAGTTCGGCTATCCACCTCTTGTTTCTTTTACCCACATATGCGGTGGATCCATCATTGGCGAAAGATGGGTTTTAACTGCGGGACACTGCGTACACGATCTGCCTTCTTCCGGTCAATTAATTATCAAGGCTGGGAAAAACTCTATTAAATCCAAAGAAGCAACAGAGCAAACTGCCTATGCTGCTAGAATGTACATGCATCCGCAATATCAAGGGA…	1058	4.27e-163	98.7	1072
serine protease 52	GL273815.1		1 to 1171	CTACATTCGACGATGGCTTTCAAACTAATCGTCCTCAGCTGCCTGCTGGCACTTGCCCATTCCGGCCCACCTCGGGGTGAGGACGCCCTTTTTCGGCAGTCGTATCGTAGGTGGTGAGGACGCAAACGTCGGTCAGTTTCCGCATCAAGTGTCCTTACAATGGGGAGTTCCACCGATGCTTGCTCTAAGTCACTTCTGTGGTGGTACCATTATCGCCGAAGACTGGATCCTGACAGCTGGACACTGCGTGAAAGCTGTCTCCAACTACGGAACTTTTGCTATTAAGGCTGGAAAACACAACATCAACAAGAAGGAGGCTAACGAGCAGATGTCTGAGGTTGAAAAAAGTTTCATTCACGAAAAGTACCTGAAGCGTAGGACCATTCGATATTGCCCTTC…	1096	7.48e-103	98.7	1199
serine protease 64	GL276389.1		1 to 897	GCTTTTCGTTCGCGCTCTTCAACATGAAGCTTTTGTGCCTTAGTCTTACGCTCCTAATTGCAGGCGCGAACTGCTTCTATGTCGGACAATACCGGTCGCGAGAAGGATAAGATCGTCGGAGGTGACTATGTTTCGATCACGGAAGCGCCGTACCAAGCCAGGCTCAACTTCTACAATTAGGTTCTGCTATCTGTGGTGCCACCATCATCTCTGAATACTGGCTCGTATCAGCCGCTCACTGTTTCGAAGACACGTATGGCATGTCTATCCTTACTGGATCTACGTACAGATCTAAAGGAGGTCAAAAGCACCAAATTGAGAAAGTCATCGTTCACCGCGGATACGATGAGTACACCAACGATAACGACATCAGTTTGATCAAGAGTTGGTTAAACCAAT…	903	0	98.3	916
serine protease 48	GL273815.1		1 to 858	ATGCTGTCTTTGAAACTCATCGTTCTTAGCTGCCTGGCAGGACTTGCCTGTGCCGCCTACCGTCCATTGTTTGGCCAGGCCAAATCTCTTGCGGATCTCCTCAAGTTCAATCGCATTATAGGCGGTCAAGATGCCCTAAAAGGTGAATTTCCGCATCAGGTCAGTCTGCAATGGGGCTATCCCCCCTTTGTTGCCTATAGTCACTTGTGCGGTGGTTCCATCATCGATGAGAGCTGGATCTTGACTGCTGCCCACTGCGTAAACACTTTGCCAAGGTCTGGGGAATTCGTAGTCAGAGCAGGCAAGCACTTCATCAAGAGCAACGAAGCCACCGAGCAAATTTCGCTGACCACAGAAGTTTTCATTCATAAAAATTATCGGTGAGGTTTCACCGTTCGA…	857	5.51e-158	98.4	858
serine protease 49	GL273815.1		1 to 1058	ATGGCTTTCAAATTCGTCCTCCTCAGCTGCCTTTTGGCTCTCGCCAACGCTGGTGGTCCCTTCCTCTCGGTAAGGACCCCTGCCCTCACCCCAAGACTGGGCAATGGCCTCGCTCCACTGGAGGCCCGTATCGTCGCTGGCGACGAGGCTGAGGCCGGCGAATTCCCTCACCAGGTCTCGCTCCAATTTGGCGCCTCGCTCCAAAGCGTCGCTCATTTCTGCGGAGGCACCATCATCCACCCACAGTTCATCCTGACCGCTGGACACTGTGTCAATGCTGTCCCCAACTACGGCACATTCGCTGTCAAAGCTGGCAAGCACAACCTCAAAAAGATCGAGGATAGCGAACAGACCGTCGAGGTCAAGAGCACCTACGTCCACGAACTCTACCCTGGGTGA…	1029	1.1e-141	98.1	1058
serine protease 7	GL277752.1		1 to 956	TAGAAGGTGCTCGGATACGGTGCGATCAATATGTTCCTTTTTTTACTAATTCTCGGCGCAGTAGCTGCGGTCAATGGCTGGTCCAGTCTCCACCAGGCGTCCAATCTTCCCGAATGGTCGCATCGTGGGCGGCGAGGATGCTGTGATCGAGACCTTCCCATACCAGGTATCACTTCAAGTCGAGGGCAGCCACATGTGCGGTGCATCCATCATCTCCGCTAACTGGATCATCACTGCTGGTCATTGCGTCGACTTCCCAGCCAAATACATGACGATCCGTGCTGGTAGCAGTTTCAATCACAAAGGTGGTACTATTCACAAAGTCAATAAGGTCATCCGCCACGAGAAGTACTACACTAATGAGTACGGCGTACCTTTCTACGACATCGCCGTAATCAG…	955	0	96.8	960
serine protease 72	GL275349.1		1 to 1045	GCAGTTTTGTTTTGCACTACATCTTGACATCATGCTGAAGTCCGGTTTGATTTTGTTAAGTTTATTTGCCGCCATTCAAGGAGGCCGGGTAATCGAAAATGATAACACCCGTATTGTGAATGGAGAAAATGTCAGCCTTGGCGAAATCCCTTAGCAGGTAAGGTATCTTTACAACGAAAAGTAAATAACTTTCACTTCTGTGGTGGATCTGTTCTGAATAAAAACTACATCATCACAGCAGCTCATTGTGTTTCCGGGTACTAATCCCGAAACTATCCAAGTCATTGTCGGCACTCTCAACTTAGATGACCCACAAGCAGTTTACTTTGCATCAAAAATAACCGTGCACGAAGCTTATTCGCCTTCCAATTCATACAAAAACGACATTGCCTTGATCAA…	1165	3.72e-72	97.5	1257
serine protease 76	GL277752.1		1 to 1262	ATCAGTAGCTTTTCTTGTTCCTGCTGCTACTAGAGTAAAACATTTTCAAGATACAAAAATGGGCGTTAAATTGAAAGCTAACAACAGCGTCTTATTGTTTTGTGCGATTTCCGTAGACGAATCTCCCAAAAACACGACTTCGAGAGCTGGGCTCTGTTTATCACCCTCTGGATCGCCGGGCCAATGCATCAGACTCAACTACTGCAGACCTCTTCTGGACTTTTTCAACCAAAATCCAGAATTCGCCGAACAGGTCATATACAGTTATCTCTGCTCAGGAGGTAACCGGCGCGGGCTCTTCATCTGCTGTCCCCTAAGCAGCAATCAGATCCAGTCTCCTAAACCAACCGATACGACATCAGCATCGCCGGTGAACAATAAGGGCCATTCGAAGGTTCA…	1240	5e-108	95.6	1296
serine protease 9	GL277752.1		1 to 1368	GGCGTATCATGGATTAAACACTAGGCCGATTGATAGTTTCGCGTGCGTATCTCNGGAAACTAGCGATTGTAGCTTCGCTGAGATATTGGAGGAAAAAGTATATTATACAAGCGGTGTATGTAATGGTCTGTTGATAAATTGATAACGGTATCAAAGTTGTACAATTGAGAGAAAATTTTGAGAAAAATGATGGGACTTTCTTCCGAGAAATGCAAGTAAAAATTAGCTGTGTATAAACCGGTGGGAAGTAAGCAGCTCGCAGTGTTGATCGCAGTAAACCAGAAATTAATTCAACTAAATGTGACATTGTTTTATTCAAGAAGATGCTTCAATTGCTAATCCTGTCTTTTGTTTTTCTCAGGGTTGAAAGTGTCCTGGATTCTACAATGTGACGTTATC…	1368	2.65e-165	97.3	1368
serine protease 93	GL274307.1		1 to 1057	GCGATTCTCCAGTGCAACAGTCATGAAGGTACTTGTATCTGTGTTACTGCTGTCTTTGGCAGCTGGTACAACCGGCATTCGAAAGAATCGTCAGTGGCCAAGATGCTCCCGATGGCAAGTTTCCATACCAGGTAGCGTTGAAATACTTTGGCTTATACTTTTGTGGTGGATCCATCATCGATAAACGCTGGATCTTGACTGCTGCCCACTGTCTTCGAAATCGATCGCCCGAATTCATCAAGGTCTACGCCGGTTCTAACAAACTCACGGACGAAAAGGCTCAATTTTATCAGGCGGAGTACCTGACCTATCATGAAAATTTCACGATGAAGTACTTGGACAATGACATCGGTTTAATTCGTGTCATCGAGGATATCGACTTCAACGAGCATGTACAGC…	1078	1.24e-126	98	1074
serine protease homolog 90	GL277096.1		1 to 1597	ATTCCTAAGCGTGAGCTCGGACTAGAACGATCAGTACAACAGTATATAGTTGTATACAAGTGAAACTTCGTTAACTAAAGCAACTCTTGTAAAATTGACGAGAGCTATACACAGTGACATAAAAATATGCAGCTAGCACTAAAATTGCTTTTTCTGACGGCGGTAATTAACTGTCACACAAAGGCAGTCCAGGAAATTGTTATCAATGCTATCGGACCAGCAACAAGAGCCTGCGAGTGCGTATTATTTTTACAATGCGAAAATAAAAAGAAAGTAATCAATAACCTCATCAATATTCGATCTGGTACTCTGACGAATATTAGAAACAGTCCTAGTCAACGGAGCGAGCAACACCGTGTGCGACAATATTCTAAAGGTCTGCTGCGAGCTGTCGAACTT…	1607	1.16e-142	98.7	1597
serine protease homolog 103	GL275014.1		1 to 944	ACTTGCATTCAGATCTCAGCATGTCGAACATCTTGCAGTTTGGAGCGGCGCTTCTGTTGCTTCGGGGTGTCTAGTGTGTTAGGTGACAGCATCGACACCTACGTAACTGGTGGTGAAGATGCTTACCCTGGCCAGTTTCCTTACCAGGTATCTATCGAGTACAAACTAACTCCGATAGTAGGCAAGTACAGACATGTCTGTGGTGGCGCTATCATCGACCAGGACTGGGTGGTCACCTCCGCCAAATGCATAACTCTCATACCCGTCATTGGCTATATTCAGGTCAAGGCTGGCAAGCATGAACTGCAGTCAGATAGTGAGTACGTGCAGAAGTCTGATGTAGCGGTCAAGCTCGTGCACAAGGACTACAGAATAAACCTCATTAACCCGATCAAATCC…	940	7.94e-161	97	966
serine protease homolog 126	GL275593.1		94 to 845	TTCAGCCCTGAGCATAAGCAGCAGGATAGTAGGCGGCGAGACGGCTCCGGAGCACGCCTACCCCTACCAGGCGTCGATCCGAATCGGTGCCGAGCACAAGTGCAGCGGTTCCTTACTTAACAACCACTGGATCCTCACGTCGGCCCACTGCCTCGTCAAGTACGANCCGCCGAGCTTCATCATCGTCGTCGGCAGCAACAGCCTCATCTTCGGCGGTTTCGCCTTCTGCGCTCGCGAAACGCGCCTGCATCCGAACTACGTCCAGGGCGAGCTTCACGACGACATCGCGTTGCTCAAGCTGTGCCAACCGGCGACTTTCGGCGACAAGGTTCAGCCCGTCCAGTTGCCGAGCGAGGATGCGAGGGACGAGGAGAATCTCACGGCTGTTCTGACCGGTTG…	757	0	96.1	846
hypothetical protein	GL277825.1		1 to 1801	GTTATCAAGCAATGAAATCTTCAACACATAATGGACTATGAAATCCTTTACGAATGATTACTTGGAGCTTAAGTTTTTAAGGAATATGGAGTTAGATTTTTCTTTTTCAGAAAATAGTTTTACATCAGATTTTGAGATTTTAGAATCTACTTATGAAGAATATTTTAGTTCATCTGATTTGTTTGATGCAAGCCGATTTGAATTAATGAATGTACCAAAAAGGCTGGTTTCTGAAGATATTACGGCACAATGCAAACGACTAATTCGTCAATACAATGTTATTCTAAAAAAAGTTTTATTGCTTATTCTTGATAAACAAGTAAAATTTAAAGAACAGTTTAATAGAGTAATAAAAATTCAAGAGAAACTAAATAATGTTCTGAAAATTTGTAAATCTTG…	1425	0	98.5	1807
serine/threonine-protein kinase TAO1-like	GL276103.1		1558 to 8302	AGCTGAACGGAAGCCGCCTTACTTTAATATGAACGCAATGAGTGCTCTCTATCATATTGCCCAAAACGAAAGGCCGACGCTCAACTCGGCCGAGTGGACGGACGTATTCCGTCATTTCGTTGAGGTCTGCCTTACTAAGAGTCCTAGTGAGAGGCCAACTTCCGGGAAATTGTTATCGGCATCAATTCGTGACGAGAACGCGTTCGCCCCAAGTTTTGATAGACCTTATAGGAAGAACGAAGGCCGCCGTTCGAGAGTTAGATAATTTGAACTATCGCAAGATGAAGAAAATTCTTATGATCGACACCTGTGAAACTGAAAGCCAAGTTGGTGATGCCGATGCACAGGTCAAGTTGGAGGAGCGATGTAAGATAGAAGTTGAAACCCACAAGCAACAGC…	6338	0	98.8	8302
hypothetical protein	GL274364.1		1 to 408	ATGCTGCAGAGCAGCGGTGGCAACGGCGACTGCGAGTGTGTGCCTTAGACCGTACGACAACTACCTTGACGTCTGCTGTGCTCCACCTGACGTGACCCAAGAGAAGATCACCCCCAAGCCGACTGTGCGCAAAGGCTGCGGTTAGCGCAATCCCGAGGGTGTTTGTTTCCGTATAATATGTGCCAAGGACAACGAAGCCCATTACCATGGATGTCTGTGACCTTCAAGGAGGAAGCCGTCGGTGGAAAGCCCGAGAAACTCAACGTCTAGTGTGGTGGTACTCTCATTTACCCCAGGGTCGTCCTTACCGCTGGACACTGCANTAATGAGGTAA	334	2.4e-70	96.8	408
serine protease 2	GL277752.1		18 to 972	CGGTGATTCCTCCGCCGACATCCGGAACCATCCGTACCAGGTCAGCGTCAACGCTTACGGCAAGTATACCGGTGCAGTGATGCGATAATCAGCTGTGACTGGGTCCTCACAAGCTGGCACGTCGCAACTTCAGAACGACGGCACCGTCCACTCGATCGCCAAGGTTANCGATCACGATCACTACACCTGCAACTGGCCAGGTTCAACGACGTGGCGCTGCTTAAGCTCACGGAACCGTTAGAATTCGACGAAAACACTGAGCCGATCGAGTTGGTCGACGCCAAGGTCTCGATTATCGAGACTCTACCGGTGTCATCAGCGGTTGGGGTACTAAGTTCGATGGCTCGGAGCTTCCTCGGCTGGAAGAGCTGTAACCACGGACATAATGTCTCTGTCCGA…	658	3.67e-107	94.3	672
serine protease 5	GL277752.1		1 to 792	ATGTTTTTCTCTCTTGTGATGATCAATTTAATAGTCACAGCTAATACGGACAATCTCTTTTCACACGGTCGAATTGTGGGTGGTGAGGATGCAACGATCGAGACCTATCTAAATCAAATCTCCATTCAAGAATATGGTTCTCACATCTGCGGAGGGTCTATCATATCCACCTACTGGGTGCTAACCGCTGGTCACTGCGTCAAAAGTGATCCTTTGAAACTTAAATATTCGAGCAGGTACATCAATTCGTGACAAAAACGGCACTATTCATAAAGTCGATAATATCATCCGCCATCAAAACTACTTTGAAAATAGTTACGGGGTGCCCTCTAATGACATAGCTTTACTTAAGCTAAAGGAACCCTTCGTGTACGATAAGACCCATCAGCCCATCAAATT…	793	0	97.9	798
serine protease 6	GL277752.1		1 to 977	ACGAGTTCAGCTGTGAATCGATCAAGATGCTTTCCTTCCTGGTGATTGTCGCTTTGGTGGCTACCGCTACTGGCGGAGCCAATGTTCCCACATGGCCGCATTGTCGGTGGAGAGAACGCCGTGATCGAAACCTATCCCTACCAGATCTCCCTCCAAGTCTACGGCAGCCACAACTGCGGAGGTTCCATCGTTGCCGCTAACTGGGTTGTAACCGCTGGTCACTGCGTCGGCTTCCCCGCCGCCTACATGACTGTTCGCGCTGGCTCTTCCATCCGCGGCCAGGGTGGCAGTGTTCACCAGGTCGACAAGGTCGTTCGTCATGACCTCAATGATGTCGCTGTTCTCCATGTCAAGGAGCCGTTCAACTTCGATGATACCCGTCAGCCCATTAACCTCTTC…	817	2.34e-124	98.5	977
not on current assembly	GL277752.1		1 to 804	ATGGTTCGACTCATTGTCGCAGCGTTCATTTTTTGCTTGGCTGCCGGGGACATGAAAATGTTCATCCGCCAAAGTCCATCATAGGCATCAACCCTTTCACCCCTCAGGGTCGCATTGTCGGAGGTCGGGAGACTAGCATCGAGGAGCACCCTTGGCAGGTATCTCTTCAATTTCTTGGGTTCCACTTCTGCGGTGGAAGTATCATCTCTCAAGATACAATCCTTACTGCCGGTCACTGTACAGTCAGCTATCCAGCCTCAATGATATCCGTGAGGGTTGGAAGTTCCAGAACTGCCGACGGTGGAGCTCTTCATGATGTCCACGAGATTATACGCCACGAGAACTTTAAAACCAACATCTATGGTATCCCGGAGAACGATGTGGCTTTGCTCAAGCTGA…	806	0	97.9	804
pyrexia	GL277211.1		1 to 3100	TTTAAGTATACACGCAAAGCGGCCGCGCTCGCTCGAGGGAGAGAGCGAGGGATATAATTTTAGAGTATTAAGAAGCGAAGGATGAAAAGAGAGGCTGCGCCTGATACTTGTTACAGAGCCGCGTAAACTCGCGCGCGCGCGGCAGAGAGAGCATGAGTAAATACCGTTGACCGCATTCGTTTTCGCGCGCTCATCNGCCGCGTGCCGCCGCCGGTGACTCGGCGGGCCGATTGTTTCACCAGCTTGTTTCTTTCCCGTTCACTGCAGTACACTGTCTCCGTCATGTCGAGCAGCAGAGGCAAGTCCGGCTTCCTCGACAAGCTCGCGGGCCGGAGCAAGTCCGGCGGCAGGGCCGGCAACGACGAGACCAAGGACCAGCCGCCGACGATCTTCATCGAT…	2735	0	97.8	3100
hemolymph lipopolysaccharide-binding protein	GL276289.1		3 to 985	CAGTTGGAAGCGAGATCGCGAGGAGGAAAGAAGGAGCATGTCTGCGCGTCTGCTGGCTTAGTGAAGATTACGAGAGTACTTCTATCACCTCTACAAGTAGTCCATGCAAAATTGAAAATCATGTGGCCAGAGTCTCTCGTGATCGCGACGCTCCTGATGAGCAGTCAAATCCCGTCATCGGCCTGCAATGAATTAAACCTTCATTTGTGCACGAATAATGAAACGGTCGCCGTGCAGGTTCTGACGAAAACCGAGATAACAGGGAGAAGGACAACATGTCAGTGTCAAGCCGGCCCGGTGGAGAGCCCAGTGATGAAAGAGGATTTCGTTCACACCCCCGGGATCGGCTCGCATAAGCTACACACCAAGGCCGCGTCCTGGAACGAGGCAAGGAAAATC…	982	0	97.4	985
protein NPC2 homolog	GL277306.1		1 to 1430	ATTTGCGCAGTGTGCAACGTTTCCCTGGATATTGTCATATTCAATCGTGCATACGATTAGTTTTCGACCGTCTTCCAAAAGCGCAGAGTCGTTGTGCAATTTCACTTTCTCTGCGGAACAATACTTGTTTTCGCCGTTTAAAAGTTTTGGAATTTAGTGTGGGAACGCAAGAGGCGTCGTAACGGTCGTTTTGATAACAGTGTGTAACTTCAACGCTCTCCTCGCAGCACGTCTCATCTGCAGCTATACTCACAAATGCAGCAAGTCATCCAGAATCAAGCCGGAAATCGTCGTTGACATCAGCCGAAATCCCAATAAGCCAGAGCTCGATCGAGAGATTTATTTACGTCGCGACGACGCGTGGCGGAGAAATTTTTTCTCTCGGCGAGCGCCGGCGAT…	1473	0	98	1435
hexamerin 79	GL274414.1		1 to 2153	ATGACGTCTCATCGCGGCGTTCTCGCAACAAGCCTCTTTGCTATAACAATAACAATAGTAGCAGGGCTTGTTCGAGCCTCGGAGATACCTTCGGCCGAGGCCGATTTTTTGCGGAAACAGGAGCTGGTGTTCCAGCTGCTGTGGAGCAGCAGAGAAGCTCCGAAGAATCATCCCGAGGTTTTCGAACGGCTCAGGAACTACAAGCTTGAAGACGTCGGTGCCGCTTGCGAGAATCATAGGAAGTCAAGCACTACGAGTCGCGACTGTCGAAGGCGATCGATTTGGGCGAACTGCGCACTGGTTCTAGCTCCAAAAGAAGCTGGACGAGTCCTCGAGCTTCAACGATCTCTGTAACGCCCTCCAAGGTAACAATGACTCACCGCAACCGAAGCTCTACGG…	1412	0	98.1	2153
serine protease 24	GL277800.1		28 to 2124	GGGACGCCGAATCACGCTGAAGTTATCAAAGGGGAAGCTCCTCCTTTTATCTGCATCGATGGAAGCGAGATATCACTGACAAACGTGTGCGACGGTCTGCCTCACTGCGCGGATTCTTCGGACGAGACGACTAAACTGTGTCACCATGTAGTGTGTGTCCGATCGCAACATTCAGATGTGCATACGGAGCGTGCATAGCCCGCAGTGGACGATGCAACGGATTCGTGGATTGTGTGGATGGAAGTGACGAATTGTATTGCGACGATGATTCGGATTGCAGGGATCAAAAGTTTCGCTGTCCCACGTCGTCGGAGTGCATTTCGTCCGCTCATGTTTGCGATGGGGGATCCAGGATTGCGCGGACGGAGGTGACGAGAACGCGGAAATCTGCAGAGACTA…	2119	1.05e-110	98.8	2126
serine protease 25	GL277546.1		1 to 755	ATGATCCAGCTTTCATCTTTAGTGCTGATCGTGGCTTTGGCTCTGGAGCCAATGCAGGAGTTACGGATAAATTGGTCGGCGCCAAAAACGCCGACATTGCTGAATTCCCATACCAAGTGTCCCTGCGTTTAGGAAGAAAACACTTTTGTGGAGGTGCACTGATCACCAAGAAGCACGTACTGACAGCAGCTCACTGTGTCGCCGCCGTCAAGAGCACTGGCTTGAGCAGGTTGTCTGCCGTTGTCGGTACCAACAGTGTGTCCAGTGGTGGATCGACATACAGAATCAAAGCTCTGTCTTCGCATCCGAACTACGTCAGCAAGCCAACTCCTGACTGGATGTACGACATCGGTGTGATCACCTTGCTTCTGAAGTTACACTGTCAAGTCGGGTGGCCTT…	756	0	97.8	765
serine protease 26	GL277546.1		44 to 765	TAGGAGCCAATGCAGGAGTTACGGATAAATTGGTCGGCGCCAAAAACGCCGACATTGCTGAATTCCCATACCAAGTGTCCCTGCGTTTAGGAAGAAAACACTTTTGTGGAGGTGCACTGATCACCAAGAAGCACGTACTGACAGCAGCTCACTGTGTCGCCGCCGTCAAGAGCACTGGCTTGAGCAGGTTGTCTGCCGTTGTCGGTACCAACAGTGTGTCCAGTGGTGGATCGACATACAGAATCAAAGCTCTGTCTTCGCATCCGAACTACGTCAGCAAGCCAACTCCTGACTGGATGTACGACATCGGTGTGATCACTCTTACTTCTGAAGTCAAACTGTCGAGTCGTGTGGCTTTAGTCAAGCTTCCCACGAAAGACGTCACTATCGGTGACGAAG…	722	0	98.8	765
copper chaperone for superoxide dismutase-like	GL276289.1		14 to 963	AGATCGAGTTTGACGTGCAGATGACATGCCAGAAATGCGTTAATGCCGTGGAGAGTGCACTGTCGAAAGTGGAGGGGGTAAATAGTTATCAGATATCTTTGGAACAAGGATCAGTCGTTGTCGAAACAAACTTACCTCATTCGAAGATACAAGAGATTATTGAGACTAGCGGGAGAAAGGCTGTACTTAAGGGTTATGGAGAGAGTTTGATATTAGTGCTGTATCAATGCTGGGAGGCAATTCGGGATACAGTTTTGGTGACTTAATCAGAGGAGTAGTAAGATTTGTCCAGACAAAAAATGGATGTATAGTAGATGGTACAATCGATGGATTAAGTACTGGCCCTCATGGCCTACATGTGCATGAATGTGGAGATATATCAAAAGGCTGTGAAAGGTG…	953	5.94e-92	98.7	963
MD-2-related lipid-recognition protein-like	GL277425.1		1 to 554	CAAGTACGCCAAAAGTGTGTACGATTCATGAAGTTCGCGTGCTCCCGTGTAAAGAAGCAGTTCAAGGAAAAGCATGTAATTTAAAAAAAGGAGAAGATGCTAAAATCAGCTTCGACTTTACCCCAACCAGAATTTGATGCTTCGAAAGTTGAATCGCGAGCTTACTGGCCAAATCAGCTTGTTGATTTGCCATTGATGGGCATGGAATCCAATGCTTGTAAGGAAGGAACAACATGTCCTTTAGCAAAAGATACAAAATATACTTACAATATTAATCTGCCTATCTCAAAAAAATTCCCAACAAGGCCGTTTGACGTCAAATGGAAACTATGGAATACTGAAAAGGAAGACGAATTATGCTGTTTTCTATTTCAAATTAATTTATTAAAGTAAANNNNN…	558	5.44e-87	97.6	554
serine protease 31	GL277784.1		1 to 957	ATGTTTAAGTTAAGCTGTAGCACTGTTCAAATAAGTTTACATGTCCTACTATTTTTTGTTGGTATAAATTGCAACACTACAGAGATGGCAAGAATCCAGAAGAATTGGCATTTGACGGATAATGGTCAAGTTTCAAAAGATGGAATATCTGGAGGTACATTTGTTACTATAAGAACTGTACCATACTTGGGGCCCAACTTATTGAAGATGGAAAACAAGTTTGCGGTGGATCAATTATTTCTGAGAAATGGATTTTAACCGCTGCCCACTGCTTAGAAGATGCCGGGGAACTTGAAATTCGCACTGGATCAAGTATGCGGAACAAAGGAGGAAAACTTTATCCAGTGGCTGAATATATTGTTCATGAAAATTATACAAAAGGGGCCTTCGATAATGACA…	846	1.95e-62	96.6	957
protein NPC2 homolog	GL277306.1		20 to 524	TCATCATTTGCGCGTCCCTGGTGGTTCTTTCAAGTCAGTCGACTCCGGTCGAAAAATGCAAGGATAGTCCAACACCTAAGGACGTCAGAATTGACGGGTGCACCAAAACCCCGTGCTCGCTCGTCAGAGGCACCACCGTTACCGCCGAATGGGATTTCTCCATCCTCGAAGATACCAGGGCTCTGAAACCCCGCGTCCGTGCCACCGTTTTGGGCATGACCGTCAACTACCCGTTCCCCCAGAAGGACGCCTGCAGCACCCTGACCAACGCCAAGTGTCCCTTGGAAGCCGGCGAGGCCGTCACCTACCAGCTGAGCATGCCTATTAGCAAGTTCTACCCAAAAATTTCACTCACCATCGAGTTTGCTTTCCTCGACGACAAGGACAATGTGGTCACGT…	505	1.81e-167	98.2	524
high-affinity choline transporter 1-like	GL274726.1		1 to 2439	ATGGGGCTGTACGTGCCAGGAGCAGCCGCACTGGCCGGGCTCTATGGGACGATCCTCGCAGTGGGCATATGGGCCGCCACGACGAGACGCAGGAGGCCAGTCGGAGGAGGCGGGGGAGGAGGAGGAGCTGCGGGACAGCAGAGCTACATGATACTGGCCAATCGTAACGTTGGACTCGTGCTCGGCATCTTCTCGCTCGTAGAGCAACCTGCGTCGGCGACACCTTCGTCAATGGGACCGCAGACGCGATGTACCGCAAGGGCCTGGCCTGGTGCCAGGTGCCCATCGGCTACGGCCTCAGCCTCCTCTTCGGGGCGCGCTGCTGTTCGCCAAACCGATGAGGAAGGCCGAGTACGTGACGATGCTCGACCCGTTCCAGCAGCACTACGGGGCCCGAGT…	1989	5.83e-102	98.9	2439
serine protease 34	GL277752.1		1 to 914	ATGAGGCAAATCTTATTTAATATTTTACTTCTTTGCGTCTTGAATGCAGTATGGGGGGACAACCTCGAATAAGAAATGGCCAAAATGCAAAACTGGGCCAATTTCCTTATCAAGCAATGCTGTTGTCAAACAATCATAACCTATGCGGTGGATCGATCATTCATAAACGTTGGATTCTCACAGCAGCTCACTGCATAAAGAAGGACTCCGAATGTTGACCAATATAAGATTGCCATCGGTGGCGTTAAAAGTAATACAAAAGATAGTACTAAATATACAGTAGAAGCCATCGTAAGGCATGAAGAATTTAGTGACAGCTTCTACAATGGCCTTTATGACATTGCACTTATACGACTGAAAAGTGACATTCCATTCAATAAATATGTGAGCCCAATAAAG…	919	1.72e-132	98	914
serine protease 35	GL277752.1		1 to 910	CTGACACTATGAAGGAACTGTTCAGAAGTATTATAATTTTTTGCACCGCACAGGCAGGATGGGGGGGCTTACGATGTACAAAGGCACGGAAGCCTATTTAGGCCAATTTCCTTATCAAGCAATGTTGCTGCTCAACGATCAAGAACTTGTCTGTGGTGGATCGATCATTCACAAACGTTGGATTCTTACAGCTGGTCATTGCAAAGTGTCAAATACATATAATGAACAGTACACCGTTGCTATAGGCGGTATTAAGGCTAGTGCAATAGATGCTGTAAGGTACCCCATCGAGGCCTTCATAGTGCACAGCCAGTTTTCAGGAGTACACCTCTATTACGACATCGCTCTTATTCGTTTGAGGTATGATATTCAATTCAGTAAAATTGTAGGACCAATAAA…	908	2.68e-72	98.6	910
ecdysteriod-regulated 16 kDa protein-like	GL274236.1		12 to 954	AGAGAGAAGTCTACCTAGCACACGTATCGAGCGCGCGATCCCCACCTGGTGGCTAGCGAGTCCCGCTCGGTTTTCGTATTATATACAGCGGCGTGTAGCGCTCGGCCGATCGCCAGTCAGTCGTGAGCCGAACTCGAGACCGCTACTGCCTGCACACGAGCATCTAGTCAGCAGCTATATACTTTCACCCAGAAGTCATCGAGCGATAAACATGACGAAGACGACGTTGATTCTCATCGCCGTAGCTGGCCTCATCGCCCTGACCGCCGCCACTCGCGTCAACGAATGCGGCAGTGGGGCAAAGCTCTGCCGGACACGACGCAAGTCCAGATCACCAACTGCGATGCGCCGCCGTGCAAGTTGAAGAGGCGCACGAAGGTCGCCATCGAGCAGAAATTC…	946	2.07e-161	97.1	954
ankyrin-1-like	GL274414.1		557 to 3060	ATCTGGAGCATCAATAAATGATCCTGTTGTTTTGACTTCACCATTTTGGCCTAGTTACACACCTCTGCATTTTGCAGTGGAATATGAGCGCACAGACATTGTAGAGTTACTCTTGCAATATGGTGCAGACATAGGAGCAACTGACTCAAAAGGCTTGACACCACTTCACCTGGCTGTAGAAATACATAATATAGGTATCATTGACTTAATTTTAGTAGCACACGCGAATTTCCATAAAAATATCAACCCCAAAGATCACAGAGGATTTTCACATTTTCACACTGCATGTATGAGAAATGACGCAAGTGTTGTTGAAGGTTTTCTTCAACGTGGTGTTGAAATCAACATAACAGTGAATACAGATTCTGTGCTTTGGTCTGGTTACACACCCTTGCATTT…	2513	0	97.3	3062
hypothetical protein	GL275765.1		67 to 861	GCTCGACAGACGTCGTGGAACGAGACGATCGTCGGGGATATCGGTAACTCGCCGAAGAGCAAATCGATCGGTCCTTGGAGCGAGATCTTGGAGGACTGGGTCATTTCCGGAGCCGAAAATTCCAACGCGAGAGGCTCGCGAGTAATGAAGCTTGGAGACACGGCGCTAAAAGTGACAGCGAACAAAGTCTCGCCGCCCAACAAGCGCGATGTCTCCGAAACCGATCTTTATCTGCTCGGTGGTGCTATTGAAAAATTAGTTTACAGAGTAGATTTCATGGAAAAACGCTTGAAAAGAGCGGAGGAGCTACTTTACTACGTCATCTCTGGAAACAATAAATCAAAAGAGACCCTTGTCCCGAAAATTACACACGTGTGGGCCAGTTCTGCTACCACTTCA…	802	8.76e-120	98.3	861
galectin-4-like	GL275162.1		8 to 2220	TACGCGACAATACACAGCGCGCTCAGTGTGTTTCCTCCGATGACGGATCGACGACAAGACGATCATGTCTCGCGAGTGGCTACGAGCCGTAGTGGCCCGTAGGACCGAGGCCTTCAACAACTTCCAGCACGTCGATCCCGAGGCTGTGGCGGTGGAATGTATCAACGCTTCACAAATTGAACGAGTTAAAGCCAACATCGGCGATCATCGTTACGGGCTATATTCCAATTGAAGCCATAAGGTAGGTTCTCGATAAATCTGAAATGTAAGACGTCGGGAAACATCGCCCTGCACTTCAACCCTCGCCTCGACCGTGGCTACGTCGTCCGGAACACCAAGTTCAAGGGATGCTGGGATGTCGAGGAGACCTGCTCACCGGTCGGCTCTCGGGGCTATGTC…	2241	2.26e-97	97.8	2220
serine protease 40	GL274726.1		52 to 690	GCTGCACCGAGGATAGTCGGAGGCTCGGACGCACCGGACGGCAAGTACCCGTACCAGGTGTCACTGAGAGCATCGTCCTCGCACCTCTGCGGCGGATCGATTCTGAACAAGCGATGGATCCTCACTGCCGCTCACTGCGTACTCCGCAAGCACGATTCGTTGACTGTGGTGGTGGGTACCAACCTTTTGAACGGTGGCAAGGGACAGTCCTACAAATCGGAGTACATCGCCTGGCACAAGGACTTCAGCATGCTGGGATTGAGCAACGACAAGGCTCAGCCAATCAGTCTGCCCCTCGAGGATTTCACCAAGGTTGACTACCCTGTCGTCCTCACCGGATGGGGAACCACCAGACTCGGAGGAAGCGTCCCGAACAAGCTCCAGGAGATCGCTCTGAAG…	637	2.89e-71	97.8	690
embryonic polarity protein dorsal-like	GL276459.1		1 to 736	GCAAAACTATGGAAAGCTCGCTAGAGATGAGAAAGTCGTTAGGAGTGGATCCCTTCAAAACCGGATTTGACCAGGATCTAGACGAAATCGACATCTACTCCATCAGACTGTGCTTCCAAGTTTTTCTGGAAGGAAAAGAGAAAGGAAAATTTAATGTACCTCTGACGCCCGTTGTATCCGAGCCGATTCAGAACCGTCGCTAAAGCGGCGCCTTGGATAGACTACATAAGCCACAGATCGGCAACTGCTGATGGCGGAACCGAGATGTGTATACTCTGCGAAAAAGCGACAAGAGAGGACATCGAAGTTCGCTTTTATAGACAGGAAAACAACTGGGAGGCAATAGCCGAGTTGATACCGCCGACCGTTTACAAGCAGCAGATAGCAATTGTATTCAAA…	736	1.41e-66	98.3	785
tyrosine-protein kinase Abl-like	GL277948.1		1 to 6450	ATGGGTGCTCAACAGACCAAGGACAGAGGAGTCATTCCGCCCGGGACAGTCGTTAGGCAGGCGCGGAAACAGCCCAGGAATCCTAAGGACTCCCGGGCCATGGGCTCCAACATCTTCACCGAGCACAGTGGAAGCATTACTTCAAAGCAGACCACTTCCACATATACCTGCCCTACCGGAAGGTGATCCACCAAGTGGTTCCAGTGTACAGTCAATCTCACAGCAATCTAATTTAGATCAACATGTCTCTGTGTCAAGTAGTGGCCTTCTTGAAGCTGCAAACAGAGATGGACCAGTAAAGAAAATCTTCTAGCTCAAGAAGAAGATGATCCGCAACTTTTTGTTGCGTTATATGACTTTCAAGCTGGTGGTGAAAATCAACTAGGTTTAAAGAAAGGT…	6471	8.38e-89	98.7	6450
ALK tyrosine kinase receptor-like	GL276859.1		14 to 4354	GGCTCCGGCCGGGCCGGCTGCTGCCGCTACTCGGCCTCGTCCTGGCCGTCCTCGCGGGACTGATGCAGGCGGGAGCCGAGCGCCCGGGGCGCGCGCGGCAGCCTCAAAGACCTGCAGCTGCTGCTGAAGAGCAAGCCCGGCGGCAGCCCGAGCCTCGGCCAGTGCGACTTCGACAGAGTCTGCGACTGGTTCTGGAACGCGACGGACGGGAGCTTCCAGCTGGTGAAGCCGCCGCTGCCGCCACAGCTGGGGCCCAGCACCGACGCCAGCAGGCAGCCCAACGGGGCAAGTTCCTCTACATGTCCGGCCCGCGCGTCGGCCAGCTGGCCTCCAGAGTCATCCCGCGCACCGGCTCCAACTGCTACCTCGAGGTCGCGCTCTACCAGGTGGCGATGAAGC…	4059	4.09e-123	98.9	4437
serine protease homolog 54	GL274307.1		1 to 933	ATGGCACTGATCCTCGCGTCGATGCTGATGCTGACGCATGCCGCCGCCGCAGCTGAATATAACAACCAGACGCATCAGACAGAGGAGCTAGAGGAAGCGGATGCATTGTTTGTTTGTTTGCCTGTTACAGTGGCGGATGTTTCCTGCGGTCAAAGCGAGTCTAACGTACGTCAGGCTAGGATCGTTGGGGGCCAGGATGCCATTCCTCGGGAATTCCCTTGGCTGGTGAGCATCACGCGCAAAGGAGCCCACTTCTGCGGAGGAACCATACTTAACTCGAAATTCATCCTCACCGCCGCACACTGCTTCTGCTCGGAGGAACGGCATGATGCCCGTAAGCCAGCTGCGAGTGACGCTGGGCGAGCACGACTTGCAGACGGCCGAATCACCGGTGAGCGT…	934	3.61e-119	97.4	933
serine protease 57	GL276037.1		1 to 687	ATGAAGTACTTTACTATTGCATTGTTAGTTGGTGCTGTAGCCATCGGGGCTCAAGCGCAAGTGAAACAGAAAAATTAGTAGGTGCTCAAAATGCAGTAGTGGGTGAATATCCATACCAAGTTTCACTTCGAGTTGCGGGAAACCATTTTTGCGGAGGTGCTTTAATAACCAAGAAACACATTCTTACGGCAGCCCACTGCGTCTACCCAATCAAGAAACAACCATTCCTTAGAAGAGTCATGACAGTTGTAACTGGCACAAACAGCTTGAAAAGTGGTGGTAAATCTTACAAGGTGGATAGTCTTTCATATTATGAAAAATATGTCGACAAAACGGAAGATCCAGATTTTATGTATGACATTGGTGTAATTACTCTCGCTAAAGAAGTTGAAGTATCAA…	693	5.99e-80	98.8	687
not on current assembly	GL274825.1		1 to 1677	ATGCATCGTGCAGTTTACGTGATCGCTATTCTCGCACAATTTTTCGCCGTTACGCAGTGTCAGTGTCCAAATTACTATCGGATACTTCGCAACGAGACCAGCCGAGAAATCATGGGAGTGATCAATATAGCAATTCCTGAAGCACCAAAAGCCGTAAATCTACGTTTGATTGTGAAATTAAACGTCGGCACGGCTTTGTCGCCGAAGTGCATGAAGGAAACGCGCATAGAGTTAGAAAAATCGAAGGAAGAGTCCGTACGTTTTGTTCTCGACGGAAAGCCGATTTTTTATCGGATTTACTTTCCAATCCAGTATCCTATGCCAGAAATCACTAGCATCACACTGAATAACATTCCTTTTTGCAAGGGACAGCCATCTCATGCAGGAATGAATATAGTC…	1781	0	97.8	1677
mitogen-activated protein kinase kinase kinase 13-B-like	GL277030.1		1 to 3750	CTCTCCCTCTCTCGCTGTCTCTCCCGACGTCGCCGCCATTTTGTGCCACTGACCGCGCGCGCATACGCGNGGATTCACAGGCCTCCCGCGGACGACGTCCTCTCGGTGATGCNNNNGCCGTCCTTGGAGAAATTCCGACAAACTCGTCCCGCTGCCCTTAGCTAGAACGAGATACATCGTGGTGACTGGTGAAGTGAACCTGTGCGTNNNTGTGTCTGCGCCTCGGTTTCGAAAGAGCTGTTGTACCTGCGTGTAGGTATACTGTACCTGGTGGATATAGAGCTGTATGATACACAGTGAGAGGTCAACTACCGCGCGCGCGCGCGTGTGTGTGTGTGTGCTCTGTTACTGCATCCAGGAGCTATAAACAGTGCAATATTCCACGAGATCGNTATTAGC…	3255	7.14e-121	98.9	3750
hypothetical protein	GL274236.1		1 to 2085	ATGTCGAAGATATTTGCAATCGTTATTGGGGGCTTGCAGCCCTAGGCCCCCTATCCCAATCCTCAATCCTGCCCCCTCGGATGCTTCAAGACCTGAAAAAACGTACGAACGCCTCGATGGAACGATACCACGAGCAAGAGTTAACGATAATGCAGTCGAACATCAGGTTGAATCGAGACTCTCCGGCTTGGTATCTGGCCGCATCGCACGAGATGACACCAGCTGCTCACAATCTGACGGTGAAGGCGCTGAGGAGAGAGACGATGGCTGTGATGCTCGTCGAGGCGCTGCACATGCCACCTAAGGACGCCGAGACTCTGCTGCCGTCCGTCAGCACGAGTTTGGTATGTTGACCTTGTGGGGCGATTACCTCCGAATAATCGGCGACTGCAAACGTTC…	2090	4.38e-95	99.2	2085
STE20-like serine/threonine-protein kinase-like	GL276340.1		1 to 7910	ATGTCGTTCCTGTCGAATCTGAAGAAGGCGTTCCACTTCGGTGGCAACGACGCCAAGAAGAAGAAGCTCTACAACAACATCAAGATGGACGTCAATCCCGAGGAGTTCTGGGATATGATCGGGGAACTCGGCGACGGTGCCTTCGGAAAGGTCTACAAGGGATGCTGATCGAGTACTGCGACGGCGGCGCCGTGGATTCGATAATGGTCGAGCTGGAGAAGGCGCTGACGGAGCCACAGATAGCCTACGTCTGTCAGCACATGACCAAGGGCCTTGCCTTCCTTCACAAGTCCAAAGTCATACACAGGGACTTGAAGGCTGGCAACGTTCTTCTGACCATGGCCGGTGGCGTTAAGATAGAGCGGACTTTGGTGTATCTGCGAAAAACAAGTATACACT…	6086	4.49e-117	99.4	7910
hypothetical protein	GL276289.1		1 to 4143	CCTCGAGCTCGCGACTCGCCTCGATTTTTCAGTCTGCCGTAGTGGGCNNNNNNNNTCGATTCCTCCGTTTCCTGCCACCGGGAGGAAAATTTCGAAAAAACAAATTCCTCCGCGTCGGAATACCGAAATGTTGTGAAACGTCCCTCCGCACACTGCTGCATCTCGACACTCCGTCGCAAAATGTCGAAGCTTCCACTCGGGGCCCTCCTGCTCCTGCTGCTGCTGCTGCTGCTGCTGAACGCTTCGATCGCCCAGAGAGACGAGGCAGATGCAGGNAATNGTAAGGAAAAGCAAAGCGCCGAGCANNNCGCCGAGCAGGAGATCGAGGAGCTGATAAGGAGTCTGGAGCAGCGCATCAACGCCAAGGATGCCTACAAGNNNNNNNNNNNCGAGAAGGAG…	3974	4.28e-108	98	4151
not on current assembly	GL276389.1		1 to 768	ATGGGGGTCGTCCTGGCCAGCTGTCTTTTACTTCTGAACGTTGACTAGAAGACCCAGGATCGCTGGAGGAGAATTTGTGACAATTCAAGATTTTCCCTACCAGGAGGCAAGCCTAATTAAATACAACTCGTCAGAAGAAAACAGAAATGGAGAGCCTATTTGTGGCGCTACTATTATCAGCGATAAATGGCTTGTTACGGCTGGACATTGTTTAGACGAAATGGGTGTCGCTGACCTGAAAGTTCGAACTGGTGCTACGAAGAGATACAACGATGGAGAAGAGCAAGAGATTAAGAGACTGATCATGCACTCTGGCTTCAAGATTCACGAATATATTATTACCGATGACATTGGTCTTATTAGCTCGCTAAGCCAATCAAGTTCAGCAATGTACAAAAG…	771	2.36e-149	97.3	768
serine protease 62	GL275942.1		1 to 741	ATGTTTTTAGACGACAAAGGCGTGGATCCATCGCTTCGTATTATCGGTGGCAACGATGCTGGAATTCATGAGGTACCTTACACCGTGTCCCTACGGGTATTCGACAGGCATTTTTGCGGCGGCTCAATAATCTCACGTAACTGGATAGTCTCTGCAGCCCATTGCTTTCTACCTGTAGTGCCGATCGCCCTGGTACGAATAAGAAGCGGTTCAAGTTTCAGCAACTTCGCCGGCACTATGCATAGCATCAGTAGGGTATACAGCCACGAGAACTTCACGCTTACAAATCGTGGCTCGACTATTCACGATATAGCAGTTGTTCGTGTAAGTCCGAGCTTTCAGCTGAACAAGAGCACGAGGCGACCTATCGGTATGTTCGAGCGTGGTCAGAAAGCCCCT…	741	0	98.9	741
serine protease 63	GL276389.1		1 to 711	ATGACAGATAATGATGAAAAAAGCAAAGATAAAATCGTAGGAGGAGAATTCGTCGACATCGAAGAAGTTCCTTACCAGGCAGGCAACTTTACATTGGTTCAATGCGGTTGTATTATGCGGTGCAGCTATAATTGATAAATCCTGGATTTTAACAGCTGCACATTGCACTTATAAAAAATCTAACTTGACGGTTCGCACTGGAGCACGATACAGATCGGAAGAAGGCCATAGACATAAGATCGTTAAAATCATAGAACATCCGGAGTATGATGACAAAACTGTTGATAATGACATCGCTTTGATTAAGAGCTTGAGACACCTATCGAATTCAGCGAGAAAGAGAGGCCTATTGGCATTGCAAAGTCGTACGACGAACCCATTGAGGGCCTTTTAATGCGC…	718	4.54e-158	98.6	711
serine protease 65	GL276389.1		262 to 750	AAAGGTCAGCAACGTGAAGTTGAAAAAATCATCGTTCACTCAGATTACAACTCAAATACAATTGATAATGACATTGCTTTGCTCAAGAGCTGGCAAAACCAATTAAGTTCAATGCTAAACAAAAACCAATCGCCATCATAACTACACCGCCAAAAGCAGGACAGACCATAAAAATTTCTGAATTTGGATACATAGCTGGAAGGAGGTCCAGACTAGCCACTTCTAAAAGTAGCTCTGGCTCCGGTAGTCAGTCGAAAGAAGTGCCAAGAAGCCTACTCTGACGACGATATCACGGAAAATATGTTCTGCGCCGGTAAAGGAGCAACTGATACTTGCGAAGGAGATTCTGGTGGCCCTGCTGTCATCGACAACAAATTAGTCGGTATCATTTCTTNGGGC…	448	5.21e-99	97.6	750
serine protease 66	GL276389.1		55 to 864	GACAATGAGTCCGACGCACAGAAGAAAGAAAGGATAGTCGGAGGCAGAAAAGCTCCCATTGAAAGTTTGCCCTACCAGGCAGGCTCAGTTGCTGCAAAACAACGTGCAAATTTGCGGCGCCTCTATAATTTCCAGACTATGGATTCTTACTGCTGCTCATTGTATAACCGGAAAGAATCCGAAATTCACGGTCATCACCGGATCAGCAAGCGTTTCTACGGGAGGAGATCTTCACTATGTCAGCGAAGTTATCGTACATTCCGAGTATGATAAGAATACCCAAGATAACGATATCGCTTTGCTGAAGAGCTAACAAAACCGATCGTTTACAATGAGCGTCAAAAGCCTATCAAACTTTCCACGAAACCTCCGGATGCCAGCGACCTCATGACTATTTCT…	817	0	97.8	864
not on current assembly	GL277224.1		1 to 1314	ATGTACGTACGCATAAACTTATATTTCGCCAAAGTCAGTAGAGCCGCGGAGCCCGAAGAAGACTCGAACGCCTACTGCGAGGACGAGTACCGGTCCAAGTACATAGTGACCAAGTCCCTCTTCTCTTTGGGGCAGAAAGAACCGGTAGCCAACTACAGCATCAGCAGTAGGTCCCACGGAACCGGCGCTCACCACGACGGCACCGGTGCGTTGACCGGTAGCAAGAATGCCAGTAGTCGGGATAACGACAGCGATTACGACGAGACCGGCGATAACGATCACTGCCAAGATCGGCCGACGAACAACAGAAGATCGCTAGCAGCCGGTCATCATCGATCGTCGAGCGACGAGTCCTCGACGCTGAAGAGTATCGCCGGTAACAGTAGCAGCAGCGATGAT…	1315	1.35e-119	96.6	1314
putative ankyrin repeat protein RF_0381-like	GL274595.1		51 to 2500	GGTGTAAACACTGGTGTTACTACACTACGATAGTAAAGTTGTAGATTGTAGCGGAGATGTGTGGACGTGAGTTGTTCGATGCTATAACGCCAGAATCAATAAATCGATCAATATCCCGTGATTCTAGATTACGACGCTCATGCGTTACAAGTGACATTCGCCAGAAATACATTTACTGGAAGGAGCATTCGTTAAAGAGAAACGAAGTCACACGTCGCAAGGTTCTGCTGATACGGCGGATAACTCGTGCGTGTACCAAGTAGACCTTATATACATGCACGCAACACAGAAGAACAGACGGTATCTAATCTCGAGGATAAAGCATCTTTTCCTATGTTTTCGGTGATATAACCAGGAGTATATATATTATTAATACAAAGTGACTCTTTTTATTACTGG…	1992	0	96.9	2563
serine protease 71	GL277133.1		1 to 750	ATGAAGGTACTGGCTAGTTTGACCTTGTTGTGCCTCGTGGCAGCTGCTAATGGCCGCTCCACGAATCAATGGAGGTACTATTGCGCCGGATGGCAAGTACCCATACATGGCATCCTTGTGATCTTTCGGAAGTCATTTTTGCGGTGGCTCAATCATCAACAAACGCTGGATTCTAACCGCAGCTCACTGCTTGGAAAGAGAAGAGGTCCACGGGATGTCCAAGTTCAAGTTGGAAGCAACAAGCTGTTAGGAGATCGTGACAGTCAGATGTACCAGTCCGAGTATGTCACATATCACAGGAAATGGGATATAAACACGATCACCTACGATATTGGTCTACTTCGCGTAGACAGAGACATCGTATTCACTCCGAAGGTGCAGCCCATCGCTCTCATCAAT…	761	9.77e-134	97.3	750
serine protease 77	GL276340.1		1 to 1863	ATGGTTTACAATCAAGAAAACTTAAAGTCGTCAACGATAATTTTTCCGGATAAACTCGTAAATGCCAATGGATTTCCTTTGAGAACTTCATACTTAGACTTAGTACCATACATGATGGCAAGAACAGAGAACAATAATTTATTGTACGACGGAATCACATTCAACACCACGATTTTGATATCATCAATACTAAATTTTACGTTGAAAATATTAGATATGGGTAATCATACTGTTAAATGGTCTTCTATCCAATTGAACAAGTTACACATTGACATGATGCCTGTACCACTTTATCCTGTTCCATCACGATTGAAAAATCATTGGGAAATGAGCAGGATTTTTCTGTTTGATAGCATGTGTGGTATAACTGCTATTAATAACGTTGACAACAAGAAAATA…	1866	3.57e-143	97.6	1863
not on current assembly	GL276340.1		1 to 888	ATGAATAACTTATTTTTATTCTTTTTTGGCCTTTCGGCAACTTTGCACTTCAGCAATGGTCCAAGCAGCTTTGGAAGGCGAGGGAATAATCGGCGGTGACGATGCCCTTCCTGGAGACTACCCCTATCAGATCTCCCTCGAAGTCAGCGGTAATAGCATCTGTGGTGGAAGTCTGATCGGTAGTAACCACGCAATCACTGCAGCCCATTGCATCACAGATACTACCGGTCGCTTAGTCAGACGAGCCACAAAGGTGGTAACTGGCATTTCGAAATTACGTACCTATCCGGCTGGTCGTGTCTCCGTTGACGTCGAGAAGATCTACATTCCCAAATTATACGATCCGAAAACCTTCAACCAACACATGGCAGGGGATATCGCTGTGTTGAGGTTGAAACA…	890	0	98.3	888
proto-oncogene tyrosine-protein kinase receptor Ret-like	GL277646.1		1 to 3633	ATTTCAGCGCTCTACTTTCCCCAATCAGATCTGAGCGTGAGAATACCGTACTCAGGAAATGGGATTAGACTAAATTCAGATATCAACCTCATTACTATAAGGACGCTGCGAAATGATTCGACTTCGGCAGAAGATCCGGATTATCAAATTTTGCCTTCCAAAGAAAAGTTCGCTAGTCTCGATCCTAAGAATGGAAATATCGTGCTGCAAGCTTTACCCAAAGGAGAGAAGATGCCAATACGGTACTTGTTCAGGCGAAAGAGAAAAGTGGTTCCGAAGCTATCCTAGAGATAAAAATTCTTCCACAAGCCGTTAAGGATGGCAAGATCAATTGCACCGACTACCTGCAGGAGGACATGTGCTTTTGGAGCAAGTCCAAGTACAGGATTTACGAGAATC…	3571	9.87e-109	99.1	3633
hypothetical protein	GL274178.1		1 to 1786	ATGGTCGGCTACGTCTCGTGGCTCTGCGGCGTCTTCGTCGCGGGATGTATCCTGCAGCCACCCAGCATCGCCACCGGTACACGCGCACTACCACAACCCTTACCACCAGCAGCAATTTCAGCCATGGCATCGACATCGACCTGCGCCCATACCTCGTCGTCCGGTCGACCTGATGACCGACGTCATCAACGACCTGGGAACAAGAGTCCTTCAACAGTACATCGAACCCGGTAACGTTGCCTTTTCACCTGCCGGAATGGGATTCATTCTGGCGGCTCTTTACGAAGGCTCGACCGGACACAGCAGACAGCAGATAATTGACTGTCTAGGTTTGCCTCGGGACAGGAACGTCGTCAGGGTCGGCATGAGGGATATCCACAGGAGGTTGCGGGACATACC…	1796	2.22e-104	97.6	1929
hexamerin 94	GL277224.1		1 to 1706	ATGCTGCGAAAGCTTTTAGTTTTCGCCCTAGTGGCGGTGAGCCTCGCGGCCGCGAGCTTCGAGCACGCGAAGTACGACATGAAGATGACTGACAAAAACATGCTCATGAAGCAGAAAAAAATCTTCGATCTACTCATGTACATTAACAACCAAGTCCTCACTGACGCTGAGTGGTTCGAGATGGGACGCAACTATGACATAATGTCCAATATCGATTACTACATGAACAAAGGAGGTAGTAATGGACTTCATGGCCCACTACAAATTCGGCATGTTGCGCAAGGATAGCATCTTCACGTACTACAACCAGGAGCACCGTGAAGAAATGATGATGCTCTACAAGCTCTTCTACTTCGCCAAGGACTTCAACACATTCTACAAGACTGCTTGTTGGGCTCG…	2086	0	98.6	2449
serine protease 98	GL275014.1		1 to 892	ATGATTTCATTCCTGGTTGTCGTTGCCTTAGTGGCTGCTGCTAATGGCCGATCCAATCTCTCGCCAAGACAGTACGATCTTCCCAAATGGTCGCATTGTCGGTGGTGAAAATGCGGTGATCGAGACCTATCCTTACCAGATCGAGTTACAAGTTAACGGTCGCCACCACTGCGGTGGTTCCATCATTGCCGCCAACTGGGTTCTGACCGCTGCTCACTGTGTTGGTGCGCCAGTTGAATACTTCCTTGTCCGTGCTGGCACTTCTATTAAGCTACAGGGAGGCAGCGTCCACAAAGTCGAAGAGATCATCCGTCACGAGTCCTACTATTCCAAAAACGGCGTCCCAGTCAATGACATTGCATTGATCCGAGTGAAGGAAGCTTTCCAGTTCGACGACAC…	893	0	97.8	892
serine protease 99	GL275014.1		3 to 845	GGTGAGAGACATGAAGCAGCTCCTCGCGATTCTCTGCTTGGCTGTGTCCGCCTACGGGGCCAGAGCGACTTGGGGGGCACCGATGCTCCCGACGGCGCCTATCCTTACCAGGCGGCCCTCAGGCGAAAGTCCAATTTCGTGTGCGGCGCCTCCATAATTAACGAGCACTGGCTCCTTACTGCTGCCCACTGCGTCAATATGGATGAAGGATCCGAAGGAGGCGACGGTGCTGGTCGGTACGAACTTCGTGACAGGCGAAGGTGGACACGAATACAAAGTCGCCTATCTGATACAGCACGAGGATTATGGACAGGGACTACGTACACGTGAACGACATCGCCCTCATTCGACTGGCCGAAAACCTCAAATTCACGCAGAAGGTCCAGCCGGTGAAGCTTC…	849	8.46e-76	98.6	856
hexamerin 75	GL275014.1		1 to 1935	CAAGCATCCTTTCCAGATGTTGTGAGCAAAGCTGCGAATTTCAAAGTCGAGGACCTTTTGACTGCTAATGTTGACCAGGCAGGATGCAGCTCAAGCCTACATCAAAGTGTACAACAACGGAATCTTGCCTCGCGATCGCTCTGCCTCAGCATTTTACCCGCCACACCTGGCTGAGATCAAGGCCCTCTTCGATGTTCTCTATACCTCTAAAGATTTCGAAACCTTTGCCGTGGTCTCAACCTGGTCCCGCGATGTCAGCAACCAGATACTCTGGTTCTTCGGTGTGGTTTTGGCTACATTGACCCGCCACGATACTCGCCGCGTCCGCCTCCCCAATGTTCATGAAATTCTGCCCAGCTACTTCTACAACTTGGACGTACTTGTGAAATTTAACAAAAC…	1938	0	96.5	1935
not on current assembly	GL275453.1		5 to 1344	TTATAAGTGCAAATCATGTTCGAATTGCCAATAATGGCGAGTTCGCTACACTCGGCGAGTTCCCGTATCAAGTATCACTAAAGGGAGGCACGAAGCACTTTTATGGAGGTGCCCTGTTCTCTAAAAAGCATGTTTTTACTGCTGGTCACTGTGTCCAAGAACTTGTAGATAATGGAGGATACATATTGCCTCTGACTGCAGAAGTTGGATCTGTCTTCTTGTGTCAAGGCAAGTTTTACGCTATAAAGAGAACGTCGTACCATAACGGTTACAATAGATTCACTACAAGAAATGGCTGTAAGTGCCCGCAAAACCAGGATCACTAACAGAGGCGAAACCGCGACACTTGGTGAATTTCCGTATCAGGTGTCTATCACCGCAGGTGGACAACACTTTTGC…	1341	0	97.4	1344
NPC2 homolog	GL277768.1		1 to 771	GCGCGCTTCACTCGATCTCCGGCGCTTGGCAAGATTATTTATTTATTATTTTTTAGGTAACGCGGATTCGTGATAAAAAAGGGCCGTCTGCGCAGTCAAGATGATGCGCTCCTTCGCTCTCGTTGCGCTGTTCTGCGCTGCTACCAGGGCTGTTGAATTCAAAGACTGCGGGGCTCCACTGCTGGAAACTTCGACAAAGTGGAAATTTCGAACTGCGACTTGAGCGCGCCCGCCTGTGTATTGAAAAAGGGCACCGATGCATCCATTGGTCTTCACTTCACTCCGACAAGGCATCTAGCAGAGTAACCGCTGTGGTCCACGGAATCATCGAGGACATCGACGTGCCTTTCCCGATTCCCAATGCCGAAGCTTGCTTCGACAATCATTCTGGTGTCGTGT…	776	1.46e-88	97	802
serine/threonine-protein kinase 25-like	GL275162.1		1 to 5322	AAGATGGCGCTGGTCTGTTTGCCGAGCAGCAGCCAGGGCTCTCTCGGCGGCGAAGGTAAATAATCCGCGCGAACAAGGCTCGCCCGCGAGCGACGAGGAAGACGACTCGTGAACATAACCTCCCGGTCCNNNAGTGCAACGAGGATACAGTCGCGCCTCAGAACCGAGCCAGTCGACGTCGCAGAGGCGCCCGCGTCATCGCCCTCGCGGACAGCAGCAGAGTGAGTGAGAAACGAACAACTGGCTAATACGACGGACCTAGAGAGAGCTAGNNAGAGAGTGCGTGTGTTTGTGCTACGCAACCTAGTGCTATACCGCAGCACCACGACGAGGAGGAGCCAAGCGACTCCTCGGCAGCACTGCCTGACCCAGTGCCTGTGCTAACCGTTGGCCTAGAGA…	5302	0	98.7	5391
not on current assembly	GL277752.1		1 to 735	ATGAAAGGATTAATATCCATCGTTTTTCTCCTGTCTCTCGTTGCGATGATTCACAGTGTTTACGAACACGAATTCACAGAGGCTCGACAGCTTTCGAAGGACAATACCCATACCAGGTGTCACTACGAACAGAAAAGAAAGGTCACTTCTGCGGTGGTTCAATTATCAATCAACGATGGATTTTGACTGCTGCGCATTGCTTAGACGAGGATGACATAAAAGTTGTGGTCGGCACAAATTCTCTATACGAAGGAACCGAATACGAGATTGTAAGAAGTATTATCCACGAAGATTTCGATACGAAAACGGTCAAAAATGATATTGGCCTCGCGCGCGTTGACCGAGACATTCACTTCAACGACAAGGTGCAACCGATCACACTAGCTTCAAAGAATACGA…	741	5.67e-73	98	735
serine protease 109	GL277752.1		1 to 880	GTCCATTAGAACAAGTAGTGCTTTACAATACCTTTATAATGAAAGAAGTAACAAGTATCATTTTCCTGCTCTCTATTATTGTATCAATTCACGGGGGTTACGAACACGAATCTATGGAGGCTCAGACGCTCCCGAAGGCAGGTACCCATATCAAGTGTCACTACGGAGACCATTTCACTTTTGCGGTGGTTCTATCGTCAATGAGCGATGGATTCTAACCGCCGCACATTGCCTCCAAGGGAAAAGATGTCAAGACAGTACAAGTTGTCGTTGGCACTACGTCGCGATCACAAGGAAGCGACACAGCTTACCAAGCTGAAAAGCTTATCTATCATCAAGGTTACAGTACGGAAAAATTCCAGAATGATATTGGCCTGGTGCGTGTCGACAGAGACATCA…	886	6.23e-121	98.8	880
serine protease 112	GL277224.1		1 to 1970	GTCGATCGTGATCGGGTGGCCTTTACACGCGCGCGCGGGTGACTCATGCGAGCTGGATTTCTCCGAGTGCGGATTTTCTCATAAGGGTTAACGTCGTCGCTCGCGCGCGCGCTCGGTGATGATGATGCGAGGCCTTGAACTGGGATGTGAAAAATCGGCTGTACTACTCGTGAGTCATGCGATGCGCGGAAAAAGTAAACAGCGCTGTGGGTCGTGGAAATGCGGGGATTGATTGAGAGGCATGGAGATAGAGATAAGACTTATTCGAACATTGTCCTAAGTCAGATCAACACCGAGGCTCAATAAAACTTGAATGAAGATGATTCTTTTGCTGACTATTGTTCTCTGTACATTTCATCAGTTCACCGTAACAACTGCTTTTGCTGATTGTAGATCAGA…	2022	0	95.1	1970
serine protease homolog 113	GL277224.1		1 to 1349	ATGAAACTCGGTTGGATTATCGTTTTTTCCATCAGCGCTGTCTTCGCGACAGCTCTGAGATTTCCAGAAAATGACAGAACTTGTGACTGCGTACCGCTGCCTACTTGCGGAGTGCTATGGATGAATCTCGTAGCAGCGAAGAAAGCGTCTTTCTGGGAGCATTTTAGATATACCGAATATTTAAAATCGTTAAACTGTGGATATCTCTTCTATATGCCTTACGTTTGTTGTCCATACCGAAATTTCGACGACGACAGTGATATTTCTGATTTGAGTTATGACGAAAGTGATATTCCCGATTTACATCTTGGTGACAATAGTGTGCCGCTAAATGCGCCGAAATGTTCAAAAACTACTACTAAAGGATTGCCTCCAAAGGGAAACCAAAAATCTACAGTA…	1349	0	98.7	1349
sensory neuron membrane protein 1	GL275162.1		1 to 1324	ACTTTAATCTCTGTCAGAACGTAGGCGGTTCCGCTCCGTTCACGGTGGGCCTTCGTTCGGCGGTTAAAAGTTTTTTCTTTATTCTTTTTAACAATGCTCAAGTGCTTTCAATAGTTTTTCAAATAAATATTCATTCACTGAAGTACTCATTCAAGATAGAAAGCAAATTTGAGCCATTAATTCCAAGATGTCGCTTCGCATCTGCCGATCTGTGTGTGTTGCGTTTGGATTCATTCTAGCAGGGGTTGGTCTTTTATTGGGATTCTATGTATTCCCGTTACTTGTTAATCAACAGGTCGATGATACTATGAAATTAGTAAACGGAACTGAAGCATACGAAAGGTGGGAAACACTCCCAATTCCATTACAGTTTAAAGTTTATTTTTTCAATGTGTCTAA…	1329	7.35e-107	99.3	1324
serine protease 116	GL273815.1		1 to 777	ATGCAAATCCAAAGTTACCTCCTCTCTGCCCTCCTAATATCGATCTTTGTATCAGGCAGGAATCGACAGCGAATCGGTTCGGAAAAGGATCTACGGCGGATCTGTGGCCGGAATCGGCGAGTTCCCCTACATGGTGTCGCTGAAGCGCGATGGCGTACACGATTGCGGAGGCGCCCTTATCAGCGCGAAACACGTATTGACCGCCTATCACTGTATCAGCGACGGCTACGACAATCTCACGGCCGTTGTCGGTACCAACAGCCTGAAAACGGGCGGCACGGCCTATCGCATCGAGAAAGTGCTCATTTATCCACCCTTCGACGGCGACGTCGTCAGGGATGCCTACGATCACGATATCGCTGTTTTAACGGCTCGAGCAAGAAGTGAAACTCTCCCATC…	783	7.05e-135	98.6	777
not on current assembly	GL275593.1		1 to 933	ATGAAAACCATTGGGAAGATTTTTCTCCTTTGCCTTGTAGCATTGGGCTACAGAGGCCAAAAAGGCCAGATTATCCAAACTCGCTCAAACAGCGAGTCCCGGAGAATTCCCTTACCAGGTCGCAATTTTTCTCGATGGAAAATTCTACTGCGGAGGCGCTTTGATCAGTAAAACACACGTGCTGACCGCCGCTCACTGTGTCCAGCCTATGACCAACGTTCCTTATGCCCTAGGCCAAAGGGTAGTGGTTGAAGTTGGATCGGTCAGACTACGTTACGGTCAAAGTCACAGGGTCGTAAGAGCAGCTTACCATCGCCAATACAACCATCCTTCTTTCGGAAGTACTTTCATTCCCAACGATATTGGCGTCCTTACTCTGAAAACTCCGGTCACCGAGTC…	934	0	97.3	933
not on current assembly	GL275593.1		1 to 1032	ATGAGGGTTTTTGGCGCACTACTCGCACTCTGCTGTATAGCATTAGAGCTGTTCATGGGAAAAAGACCAGGCTTTCAGACCTTGCTCCACCGGCGAAGCCTCGTGACTTTCCGTATTTCGTTGCATTTTTCGTCGACGAGACGATGTTTTGCGGAGGTGCTTTGATCAGTAAGACCCATGTGCTGACAGCAGCTCATTGCCTCATAGACCTGTTCAACGATCCATACGCCTTTGAAAGATTGCACGTAGAGGTTGGAGCCACGTCAGTTGGCTCTGGAAAATCCCACAAGGTTAAAAGAGTTTCCTACCATCGTGGATACGTTAACTCTATCTACGATTCTCGACTTTTGCCCAATGATGTCGGCGTTGTCACGGCTGAAAACCCCCGTCACCTTGTCC…	1035	0	97.8	1032
not on current assembly	GL275593.1		1 to 945	ATGAGAACTATTGAAAAGATTTTCGTTCTCTGCCTCGTGGCATTGGGCTACCGACGCTAAAAAGGTCAGATTATCCGATCTCGCTAAACCAGCGAGTCTTGGCGAGTTCCCTTACCAGGTCGCCATTCATCTCAATGGAAAGTACCACTGCGGAGGAGCTTTAATCAGTAAAACTCACGTGCTGACCGCCGCTCACTGTGTCAAACCTATGACCGATAATCCTTACACCTTAGCCCAAGGAGTAGTGGTTGAAGTTGGGTTGGTCAGACTAGGTTCCGGACAAAGTCACAGCGTCGCAAGAGCAGCTTACCCCGGAGATTATAGCGATTCTCCTTTTGAATCACTATTCATCCCCAACGATATCGGTGTCCTCACTCTGCAAACCCCGGTCACAGAGTC…	945	0	98.9	945
sensory neuron membrane protein 1	GL277768.1		1 to 1874	AAAAAATTTGTTGGGAAGAGTTTTTAGTGGCTTACCGATTTGTGCGAAAATCGATGCGAATTACGCGTAAAGGTGAAAAGTGCTTTGGGTAAAGCGCGAAGTCTTATAGGCTTTATTATTGAGCCACGTTTCATCAAGGTGAGCAATCAAGGAACGCGCCTTTGTTCGCGGGCTTGAGACTAGCCGCTGCGAATGCTCGGGCACGTCTCCGCAACTCGAGCAAATTTCGACTATTCGTCGCAGTCTTGAACGATATCGTCGAGGAGGACAAACCGCGCAACAATATGGCTCTCACGAAAATCCAAAAGATCGGCGTCGGCGGAATCTGCATGTTCATATTTAGTTTTCTCTTCAGTGGTGTTATACTGCCGCCTATAGTGAAGCACGAAGTGAAGAAGA…	1888	0	99.2	1874
sensory neuron membrane protein 1	GL277768.1		1 to 1599	ATGCCGCTGACGAAAAATCAAAAAATTGGTGTCGCCGGTTTTTGCATGTTCGTTTTTGGTATACTTTTTCAAACTGCGATTCTTCCAGCTGTGCTAAGGGTGCAAGTTAAGCGGGCAAATAGCATTGAAGAACGGATGGTATATGAGAGAGATATGGAGTGCTTTCCCATTTTCATTGGAATTTTGTTTCTACTTTTTTAATGTGACAAACCCTGATGAAATAACGAACGGTGAAAAGCCAATAGTGCAAGAAGTTGGACCATTTATTTATGACAAATGGCATAAGAAAACGAACCAAAAGGATCACGAAGAAGATGACACCGTATCTTACACGCTGAGGACAACTTATTTCTTCAACTCTGAAAAAAGTAAGGGTCTTACTGGAGACGAAGAGGTTAT…	1399	3e-110	98.5	1599
sensory neuron membrane protein 1	GL277768.1		1 to 2066	CCTCAGTTGCTTGCCGATCCTCATATTGGCAACTCGAGCTCTCGTTTGCGTGGTGCATCCTTAGTTTCTTGATTTTTCAACGTTCGATTTTTAGTCCGTTGGTTCGGTTTAGTAATTTCTTTTGTTAACAATACCCTCGAGCAGACGTTCAAGCGATCCGACGGAAAGTGAAGGCGCTCAGAGGAACCCGGCAACTCTTCGCCGGGTCGAATAGCAGGATTTCGAATGTCCGAAAGCGCCTTCGAAAATCGCGCAACTTCCGCACCTTCGTCGCTGTCTTGAAGAGGATTGTCGAGGTGGACGTCATGCCAAAAATGCACAAGATCAAGCTGACCCGTAGCCAGAAATTCGGCGTCTACGGCCTCTCCTTGCTCCTGCTCAGCGTCGTATTCGGGGCCA…	2077	0	97.7	2066
phospholipid hydroperoxide glutathione peroxidase	GL275162.1		1 to 832	CGTTACTCGGCATAAACGTTTTGGTGCTCGAAATCTTGCAAAACTCATCAGTTTGTAACCGAGAGCAGAAGAAAAAAGTCGATTAATCTCTAGCAAGATGATACGGCGCACCGACAATCGTTGTTCTGATCTGCGTCGCCTTGGTCCAGGCCGATTTCAACCAGGTCACGGACTGGAGCAGCGCCCAGTCGTTNNACGACTTCGAAGCTCGCGATCTCCAGGGCAACGAGATTTCCCTGGACAAGTATCGTGGCCACGTGGTTGTCGCTATCAACGGAGCGACCAAATGTCCAGCTTCTTCGAAGTGCTTCAAGCAGCTTCAGGCCTTGCTGGACCGTTACGGCGAATCTGATGGGCTTAGGGTCGTGAATTTCACTGTCGACGGACTGGCCGGTGGAT…	670	5.36e-158	96.6	835
not on current assembly	GL276859.1		1 to 822	ATGTCGTCGAAGCTGGCAGTTCTTTTGTGCCTCGTGGCAGCGACAGCCGCACAGGTCCCCACCGCGTGCCCCGCATCGCTGGTGGCCACTCAGTGGAACTAGGCGAACGTCCCTACTACGTATCCCTGTACAACAAGCACACGCTCGATCACTACCCGATTACGCACTGTGGTGGAGCCATCATCAAGGAGCAGTGGATTCTCACGGCTGCCTACTGCGTTGGCCAATACAAAGACGCCGATGTACTCGTCCAGGCTGGAAACATCTACTACAAGGGGACCTCCGACGCCCAACAGAGGTCGGGAATCGTTGCTAGCTTCGTTCATCCAGGATACCAATTCGAAAACCCCACTGGTCCCCACGACATCGCTCTCCTGAAGCTCGAGACGCCTCTGGAGT…	823	2.25e-153	98.6	822
serine protease 124	GL275593.1		1 to 779	ATGCAGGCATTCGTGGCTATTCTTCTTCTTGGTCTGACGGCTACAGCTTACGGCTGGACCCACATCGCGAATCGTGGGTGGTGGCAAAGCGGCTGACGGCAAATATCCCTACCAAGTACAGCTCAGGGATGCCGGAAGGTTTTTGTGCGGTGGTTCTATCATAGGAACACGCTACATCCTGACTGCTGCTCACTGTGTCGATGGACTCAGCCGAGATGCCTCAAAGATGACGATCCTCGCTGGTACGAACATCTTGGGCGACGAGAAGACAGGAAAGGTTTACCAAGCCGATGCTCTGATCCCCCATCCGAAATATGGTGCGCTGCTCATTGTCAAGAACGACGTGGCCGTTATCCGTTTGACCGAGGATATCGAATATACCCCAAAGATTAAGCCCAT…	781	1.6e-84	97.8	779
serine protease 130	GL275793.1		23 to 756	GTGCCTTCGCGGCTCCGGCGGAAAAGATCGTCGGTGGCGAGAACGCCGACATTACCGAGTTCCCTTACCAGGTATCCCTGAGACTAAGGGGCAAAGGTCACTTCTGCGGAGGTTCGATCATCAGCAAGAGGCACATCCTCACTGCGGCTCACTGCGTCGACGGTATCATAACGCCGCTGCTTAAGAATAGGTTCTCCGTTGTCACCGGTACCGCCACCTCATCCGGATCGAGCGGAAAGAGCCACAAGATCAAGAGCACTCACGTTCACGAGGGCTACCTCGGAACCGACGAGTCGTCCTACAAGAACGACGTCGCCGTCATCACGGCTCGCCGCGCCGATCAAGTTCGATGCTAAGCAGAAAAAAATCAACCTGCCCACTAAGGACGTCAGTCTTGGT…	730	1.59e-128	98	756
serine protease 131	GL275793.1		1 to 1242	ATGAAGTAGACAATAGTGACAATCTTCATCTTTTCTCCCCTCATTGGGGAAGCATTAGCTCTCGTCGTCTCAAGCCAAGAATTATCGGAGGATCCAACGCAAAAATCACAGACTTTCCTTACCAAGCGACGCTTCGACTCGTTGGTTTGTACCACCTCTGTGGTGGTAGCTTCATCAGCGAGAAACATATTCTCACGGCAGCTCACTGCGTTGATAATCTCTTCGTAAAGTCTCCGTCGATGTTGGTAAGTGTACACACGGGAACTGATAACTCGAGCAGTCCAGGTCAGGTGCATAAGATCGACTGGATTAAGATTCATCCAGACTGGAAGCAAATAGAGGAGTCGTCATACCGTCACAATATTGCTATTATTAAGAGCGACAAAACGAGATTGTCTT…	1248	0	97.3	1242
hypothetical protein	GL275793.1		1 to 886	ATGAAGCGGTACATCTGGCTGTTGCTTTGTTTGTCGAGTTGCATCCATCCGTCAACCTGTTGCTGCAGATCCAAACCCAGGGGTGACGTCAACTGCGGGATAACGTACAATCTGATCAAGTCCGACGCCAAGTCCAGCAAGTCGGTGATAACCAGGCGGCAGGTCGGCAGTATCGGCAAGTGCAAAGACTTCGCCGAGACCAAACGAGCCCTCGCCTTCAACTGAGAGCGCTATGACGACTACTGGCTCGAACTTGGATAACGGATCGCGGGAGGCGACTAATTGCGTGCTGCTCGACTGCCCGGAGACTAAGGGGCTGAGGCAGTTGGTCAATGTCACGGGCGTCGATTATTACAGCGCTTATCCGGACGCAGAGTACAAGGGGGAAACGAAAGCCTG…	889	2.38e-120	96.9	886
hormone receptor 83	GL274178.1		4 to 1135	GGGAGAACACTTCCGATACCAGTGCCTTGCAAGGTATGCGGTGACCGATCGTACGGCAAGCATTACGGGGTGTATTGTTGTGACGGATGCTCCTGCTTTTTCAAGAGGTCTATTCGTCGAGGAGTTCTCTACACTTGCATAGAGCTGGAAATGGAAGCTGCGTGATTGACAAGGCTCGAAGGAACTGGTGTCCACACTGCCGATTGAAAAAGTGCTTTGCTGTCAGCATGAACACGGCAGCAGCCGTTCAAGAAGAGAGAGGTCCACGATCCAGAAGCAAAGCATACTCGATCGAGTCAAATTACACGTGGAAAATTTCGGCAAATGTTAACAACAAGAGCCCAGACAGCGCTAACGTGACTACCAACATAATCAGCTCCCAAATCAGTGAATCCATAT…	1142	1.68e-129	98.7	1135
peroxidasin homolog	GL275793.1		4 to 2551	ACGTCCTCAAAGGTGAACGTAACCGACGAGTCGATAGTCGTCAGCAGAACAGACAAGGATGACGAGGAGGAAGGTGTCGACGACGTCGGGATAGAGCCGCGAGAGGAGGACCTCATCGAGGCCGCCGACTACGGCATTCAGGCGATGAACGAACTGTACTACGTCAAAGAGCCCAAGCTCTACTCCATGGGGGGATCTTCCTCAGTCCGGACAATCCTGCGAGGTACGTAGCAGCCTTCAACGAGCAGACCGAAGAAGCCAAGCACCTGGCCAAGTACGGATATGCGGCGCTCGAAGCTGCCCGCAAGCTCAGCAGCAAGCGACCGGGCAGAGCAGAGCTTTCAACGGCTCGGTGCCGCAGTGCTGCTTGAACGGAGGCACCGGATTTCAGCCGCCGGA…	2186	0	98.9	2574
baculoviral IAP repeat-containing protein 5.1	GL277768.1		1 to 2130	CGAAAAACGGCCAAACAGGCGGCGACAGTTTAGTTCAAAATTCCGGTGCGTATAAACAGAAGAAAGACGCGCCAAGTGTTTCCACTCGTTTTTTCCACGGGCCAGACGCACAGCAACGTTTATTCACAACCATGACGGAAGAACAAATGGACGTGAGTCGTGTATTCGAAAGTCTGAGCCCAATATTTTGGAAGAAGGGCAGATTGGAAACTTTCAAGCACTGGCCCTTCAAATCCGAGAATCACCAGTGCAATCCCGACAACATGGCCAGGGCCGGATTCTACGCGATCGGCGGCAAGGACGAACCTGACCTCGCCGAGTGTTTTATGTGCTGCAAACAGCTCGATGGATGGGAGCCCGACGATGACCCATGGTAAGAACATGGCTAGAACATAAAAA…	2131	0	98.1	2130
serine protease 140	GL277768.1		1 to 732	ATGAAAGTACTTTTTGATGTGCTTTCCTTGTGCCTCGTGGTGGCTACCAAGCTGCTCCGCGAATCATTGATGGCCATGATGCTCCCGATGGAAAATACCCATATCAAGCATCTCTTCGATTCCATACGTCGCATTCCTGTGGGGGTTCTATCCTGAATAAACGCTGGATTTTAACCGCCGCACACTGCATTAAATACGAATCAGCGAGCAACCTCAAAGTTTACGTTGGAAGCAACCAACTTTCAAGCGCCAATAACCAAGCCTACCAAGTCGAGTACCTCATCTATCACGAGAAATATGACCCTCGGATTCTTGTTAACGACATTGGTCTGGTCCGGGCAGATAAGGATATCAAATTCAGTGACAAAGTCCAGCCTGTCACTTTGCCCAGCGTCGACA…	733	6.67e-124	98	741
serine protease 141	GL277768.1		1 to 735	ATGAATATCATCATCAGCGCGGTTCTCCTGTGTTTCGCACTAGCGGCTCAAGAGCTGCTCCGCGAATCGTCGGAGGCCAGGATGCTCCCGACGGCAAGTACCCATACCAGGTATCACTTCGAGCACCGTCCCACTTCTGCGGTGGCTCAATCCTGAACAGGCGCTGGATCTTGACAGCCGCTCACTGTGTCATTGGGACGTTCTGGAAATGCGGTGACAGTAGTGGCTGGTACCCAGTTGCTCCACGGTGGTTCAGAGCAGGTCTTCAAGTCCGAGTACATCGCGTGGCACGAGAAATACAACAGTGGTCTCTTCATCAACGACGTCGGCCTGATCCGTGTTGACAGGGACATTGAATTCAACGAGAAGGTTCAGCCGATATCTCTGCCTAACGAAGAC…	754	8.38e-116	95.8	735
phospholipid hydroperoxide glutathione peroxidase	GL275162.1		1 to 1012	GTGATCTTGAGGATCGTCTGGTCGACGTTTAACTATTCAGCCTGGCTATCTTCTATACTTANNNNNNNNNNNNNNCAAACATAAATTCCCCGAGAGCAGCGGGGCGAGAGGCGCACTTTCTGGACTATCGCGGCACGAAACGAAACGCGACGATCAGTCGACAGACGTCAGTCCGACAACTAACAGTGAAAGTCAAGCAAGATGATGCGTGTTTTACAGTAATACTCGGCCTCGTCTGCATCGCCGGTGTTTTCGGCCAGAGCTGTGATAAGACAAAGGAGGAATGTCCCGAAGCAAAGGAAGCCGAAGTTAAGTTTAACCAGGACACGGACTGGAGCAAGGCTAAATTTATTTACGAATTTCATGCCAAAGACATCCGCGGCAATGATGTTTCATTGG…	1015	0	98.3	1012
slit-like	GL277768.1		755 to 7511	ACGTGCAGTACAGTGCGCCGCGAGCCTTTCGCGGGAAAGCAGCAGAAGAAGAATAAGAAGATGGCCACTGGAGCGAGCTGGCTGCTGCTGTTGGCAGCAGCGGTACTCCTGGCGTCCGAGGCCGGAGGACACGGCAGTCCTCACATGGACGGCGGCCCGGACAGCCTATCCGGTACGATCGGCAACCACAACGGAGTGCGCTGTCCCTGGGCGTGCAACTGCGGCGGCCAGGAACTCGACTGCGCCCAGCGGGGCCTCACCCAAGTGCCTGGGAATTTGGCCGCGCTCACCCTCGCCGAGAAACTGCAACTGTCCAACAACCAGATACACACGATCGAACGCGGAGCCTTTCAAGACCTGGTCAGCGTCGAGAGGCTCAGGCTGAACAACAATCACATT…	6000	0	99.4	7511
serine protease 138	GL277768.1		1 to 877	CACTGTGCGATACTACTGTACAACAATCATGAAGGTACTCGTTAGTTTGTTGTTGCTGTGCTTGGCGGTCGCCATCAATGGCCTCCCCGAGAATCGTGGGTGGCCACGATGCTCCCGAGGGCAAGTTCCCCTACCAGGTATCGCTCAGGTCTTATGGGCGCCACTTCTGCGGTGGCTCCATCATCAACAAGCGCTGGATCTTGACTGCCGCTCACTGCCTGCAATACCAATCGCCGTCTGGCATTCAGGTCTACGTCGGTGCCAACAAACTTAACGGTGACAAACCTCAGGTCTACCAGGCCGAGTACCTGACCTACCACGAACAGTTCAGCATGAACCGCTTGGTCAATGACATCGGTCTGGTCCGTGTTGCTAAAGAAATCGAATTCAACGAGAAGG…	845	8.99e-131	97.9	877
tyrosine-protein kinase Btk29A-like	GL276289.1		1 to 5733	CTGCTGCAGAGCAGAGAGGCAGTCGCGCGCGCGTTATCCTTTCTCTCTTCTTTCTCCTCTCTGTTGTTCTGTTCTCGGTCTCGAGCTGCAGCAGCCGTGCGTGCGACACGCTGCTCTCGGGCTCTTCCTTCCTCCCCGACGACGAGCCAGTGTTGCACGGTGTCCATAACCTACCTAACGCAGCTACTTCTCTCTCGAACATGCGCCGACGGCGACGAGCAGTTTCCCGCTCCTAGCGCGTGTTTCCGCGAGTGTGCGCGCACCAGCGTCGCCGAGTGAGACGGACAGAGATAAGGCGAGAAGATAACGCATCGCCGTTGAACCTGTGCGAGAGAGAGAGAGAGAGAGAGAGAGATAGCTACAGTGCGTCGTCGCGCAGGACAGGAATATACACGCACA…	5730	2.28e-129	99.4	5733
hypothetical protein	GL276272.1		1 to 357	ATGAAGTTCCTAGCCAGTTTGTTGCTGCTTATTGTTGCCGGCATGGTAGCTGTTGATGCCTACGTACCAAAGATTCCGAAACCTCAACCAAACAAACCGAACTTTCCGTCGTTCCCAGGCCACGGTCCTTTCAACCCCCATGCTCGTTTCCCATGATCTCCCAAAGACAATGAAAATATTGTTTTCGACGCAAAGAAAGAAGGTGGAAAGACTCAGTGGAACGTAGAAGCTCAGCAGAAAGTTTGGGGCAATAAACACGGCAGCATTCACGTCAGTGCTGGAGCTGGCAAACAACCAGGTGGCAAACCTCAAGGACAAGTTGGAATCGGCGGATCCTTTAGCTGGGGAAAATAA	354	4.4e-101	97.1	357
arylphorin subunit alpha-like	GL277224.1		1 to 2332	ATGATGCGCAACTGCATCGTCTTCGCCCTGTTCGTGGCGATGGCGGCTGCTGGCCAGTCCTACCCGGGCTTCTACAGCAAGACCGCCGACATGGAGTTCCTGCACAAGCAGAAGAAGATCTTCGACCTGCTGATGTACGTCGACCAGAACGTCCTCACCGACACCGAGTACTTCGAGTTCGGCCGCAACTTCGACATCGCCGCCAACGTGGACTACTTCACCAACAAGGAGGAGGCAGTCTACGACTTCCTGGCCTACTTCAAGAGCGGCTTCCTCGCCAAGGACGCCCTCTTCACCTACTACAAGCAGGAGCACCGCGAGGAGATGATGCTGCTCTACCGGCTGTTCTACTTCGCCAAGGACTTCACGACCTTCTACAAGACCGCCTGCTGGGCCCGC…	1984	0	96.4	2359
navitri-4 penicin	GL274699.1		1 to 399	TTGGTGGCACTTTCATCGTCAGCAAGTATCGGTCATCCTGTAGAACAGCAGAGTGTAGCTGACCATTCCGAAGAACAGATTATCTACGTCGATGGTGTCCCAGTAAACGAGATCGTTCGCCGAACACTGAGATCTGGAAACGGAAAGATTACTTTTGAAGTTAAAAATGAAGGTGGACAGACTTCGTTTACCGTGAACGGAGAGGCTAAGGTTTGGAGCAGCAAAAATGGTTACGTCAGCGTGACAGGCGGTGTACATCAGCCAGTGGGTGGTGACGCTAAAGGACACGTTGGAGTTAAGGGCGAATTCGAATGGAGAAAGTGAAGTTAGAATTATTTAATTTTTCTGTACATACGAACTTTTAAAATTTGATATATTAAAAAATCTTAATCCAGTAAA	399	3.29e-139	97.5	419
dorsal interacting protein 3 (dip3)	GL274950.1		1 to 1531	CCGCCGCCGCCGCCGCAAACGACCCACCGGAAAAATCCAGCTCCGCAGCCGCACCGCAGGCGATCTCTCCGTCTCTTTCTAAACTCCGCTCTGTCGCTGCGGCGACGTTGGCATGTGTTTCTCCGCAGTAGTGACGTCGCGCCGCGCACACGATCGTCCGCCGTGAGAAATTTCAACCTCTCCGCACCTAACCTCAAAATCCAGCGATATAATCTCCACCTGCTGTAAATATATCAAACCGGCAAGACGGCGTTCAACTCGTTTTCCTCGGGCGGCAAGAGCCGCGGCCGCGCTGTCGCGAGCAGCAACGGCACGTCCGGCCGACGTGCGGAAGGGCCAGCAGCGATGACCCCGGTGATGTTCGACACCGAGTGCTTCATCGCCGAGATCCAGAAGCGG…	1540	0	97.4	1531
luciferase-like	GL277768.1		1 to 1912	TCAGTCAGTTTAAGCCTCGCGACCTATATACACCATGCGCCGTGTACACGAATATCGCAGACAACTGCGTGTAAGAGAACCGGCAGGATTGAAGAGCTACTCGGAGTAGTGCATTCCAATAATTGGAAAAAAAGAACAAGAAGGCACCCTTCACGATCGAAAATAACGTGATCATAGGTGCAAGTGTACCAATGGACGCTTCGAGTTTCGACATAGGAGCCGTAATTTTGAAGATATTCAGTGATCATCCAAAGCATGTTGCACAGCACAGATCCAGGTCAAAACTGGCAAGGAGACCCTTTACCAGGACATGAAGGACGCTACCATACGTTGTGCGCTTTGGCTGCAAAAGCAAAATGTTGGTTCCGACGATGTTATTGCAGTCTGCACGGAAAATCA…	1936	2.81e-107	98.6	1912
yellow-f	GL275467.1		1 to 1850	GTCGAGGCCTGGCGAACTATAGCCTTCATTCCGAGTTATACCGTTCTCCAGGAGGCTGTGGCTCGTTGGCTTCATTCTCTCGCTCACTTCCTCACTCTCTTTCGTTCCCGTTGAATCGTGTATCAATATGCAGTGGATATTCGTTTTCGCAATTCTGACAGCAGTCAACTGTCACCCGCCCGAAATACTGTACTCCTGGGACAAGCTCGACTATAACTTTCCAAATGAATCAATGAGAATAGCATATATCGCTTCCGGAGATTTCATTCAGGCCGACAACCTTCCAGTGGGCGTCAGCGTATGGAAGGACAAAATGTTCATTACGGTTCCCAGATGGAAGAAAGGTGTCCCAGCGAATTTGAATTATATCCAGATGTCCACGACCACTGGACAAGTCAC…	1700	2.8e-107	98.6	1901
defensin 1-1	GL275793.1		1 to 439	CTTGTCAGAGTTGGAAGAAGAGTTTATATTATCTAAAAAATGAAGCTCCTACTCGTTGTTGCTTTTATCGCTGTAGCTGTTACTGCGGGGCTCTCGATTCCGCTGAATGGAATTCGAAGATGTCGTCGACTTTCAGGACTGGGATGAGGCAGCAGTCGACGAGGACGCCGGTGTAAGACAGCGTAGAGTCACCTGCGATCTCCTCAGTTTCGGCGGAGTCGTCGGCGATTCAGCGTGCGCAGCCAACTGTTTGAGTATGGGCAAGGCTGGGGGCAGTTGCAATGGTGGCATTTGCGAATGTCGCAAGGACCACTTTCAAGGACCTCTGGGACCAGCGTTTTGGTTAGAGTCGAGTTGAAAATCTCAGCCGCATTACTTGTGTGATGGAAAGTTTTATTT…	439	2.81e-59	97.8	476
peptidoglycan-recognition protein	GL277030.1		1 to 1235	TACTGCAATGAATCTCAGCCGAGCAGCATTGATACACGACTTTGTTTATTAATAACTGCTTTCAAGCATTAGAATGGAATCTTTTACATCACCGAGATGTTTTCTTATTGGGATGCTAGTTGCGATTAGCATTTTCGCCATTGGGTTCCATATTGTAACAGCGCAACAAGAAAAGTCAGTCAGACAATGAGATCAATAATGACAACGACAAAGGTGATAGCAATGTCAACTATGATAACAACTTGAAAATCGTAAAACGAGAAGAATGGGGAGCTTTGGAACCTAAGAAACCACCAAAAAAACTTCAAGTATTGCCAGCACCTTTCGTAATAATCAGTCAAACTAACACACAGGCGTGTAGACTCAGAACAAAATGTGTTAAAAGTGTTTGCAATTTGC…	1239	1.55e-56	99.2	1235
cuticular protein RR-2 family member 5	GL274950.1		1 to 732	CAGACACACAAGCAGACATGGCTTTCAAGAGTTCAATCTCTACATCGTTCTCTCAGCCCTCGTGGCAGGTGCAGTTTATGCAGCTCCTCAATCATACCACAGCCATGGTGCTCAATTATCGCTGACTAGCCATGCCATTCCGATAGCTAATCACCAGATCGAAGAAGATCACTACGATCACCACCCCAAGTACACGTTTGCTTATGAAGTGCACGACTCTCATACCGGAGACATCAAGAGCCAGCAGGAAGAGCGTGACGGAGATGTTGTTCACGGAAGCTACTCGCTCATTGACGCCGACGGACACAAACGCATTGTCCACTACACCGCTGACAAGCACAGCGGTTTCCAAGCCACCGTGCACAGGGAGCCTGTGCATCATCATGTACCCATCAAGGC…	735	0	97	756
nasonin-3	GL275593.1		1 to 273	TTTTAGCCCAAGTTCAACAAATCGCTAAATCCAAAACCATGAAGACTGTATACTTCGTCGTCTTACTGCTCGTTGCACTGACCTATTTCACCACTATTGAAGCTTCTGCTATTCCACACTGCAGCCCGTGGAGATGTCAACAAGAATGTCTTTTTAAGAACTTCATGAAAGGAGAATGCATTCAACTCCAATGCGTATGTAGTCAGAAAATTGGAGGCATCCGGCCATAACTGTTGCAAAGAGTTTATTCATTGCAGCATTAAGCAATAATTT	273	4.62e-75	98.3	339
nasonin-4	GL277538.1		1 to 247	ATGAAGACTCTTGCATTCCTGCTGCTTCTGATGCTTCTGGCTCACGTCGCGTCCTCCGAGTCAGCTTACTGCAGAAGACTCGATTGCTGGCATGACTGCATCTTCAAGTTCTACAGATACGGAGTTTGCGTCGGTAGCGAGTGCCAGTGTCGCGGCAAAATCGGCGGTGGAAAATGAGAGAATAAAGCAAAACAATGTATATAATCCGGCCGGAGCGTCGAATAAAGCACAAGAATAGAGCATCCTA	247	2.48e-87	97.8	264
nabaecin-1	GL274699.1		54 to 646	CACTAAAAACATCAACACCATGAAGTTCCTCGCAATTTTCTTACTGCTCGTTGTAGCCCTTNNNNNNGCCGTAGACGCTTCACCATACAGACCACCAGTCCAGAAACCCCACCCGAATGCACCCAAAGTGCCGTCTTTCCCCGGTCAAGGAACTTGGAGTGGCAGACCTCGTCGCTCACCTCAGAAGAATGGCCAAGTCGAAATCAATGCCAAGAAGGAAGGTGGAAAGACTTCCTGGAACGTGGAAGGCAAGCAAAAGGTCTGGGGTAACGAGCACGGCAGCATTCACATCAGCGGCGGTGCCAACAAGCAGCCCGGTGGCAAGCCCCAAGGACAGGTCGGCATTGGCGGATCCTTCCACTGGGGAAAATAAATTAAGACATTTTTAATTTTTTATTC…	593	0	97.4	809
nabaecin-2	GL274699.1		17 to 556	CTGAAAACTCAAAAGCCACAATGAAGTTCGTCATCAGTTTCTTCCTGCTCGCTGTAGGCCTCATGGTGGCCGTAGACGCTTCACCATACAGACGACCAGTCCAGAAACCCNNNNCGAATGCACCCAAAGTGCCGTCTTTCCCGGGTCAAGGAACTTGGAGTGGCAGACCTCGTCGCTCACCTCAGAAGAATGGCCAAGTCGAAATCAATGCCAAGAAGGAAGGTGGAAAGACTTCCTGGAACGTGGAAGGCAAGCAAAAGGTCTGGGGTAACGAGCACGGCAGCATTCACGTCAGCGGCGGTGCCAACAAGCAGCCCGGTAGCAAGCCCCAAGGACAGGTCGGCATTGGCGGATCCTTCCACTGGGGAAAATAAATTGACACTAATTTAGTCAACAAAA…	545	0	96.3	556
nasonin-2	GL275593.1		1 to 1099	CCGATGAGCATAGAACTCGTTTCGCTTTAGACCAGTCTAAAGAATTACCAAACTAGCAAATATGAAGTCTGTATACTTCGCTTTCCTGCTCGTCATCGCTGCGGCTTACTCCACTGCCACTGTTGCAGCAGCTTGCAATGACAGAGACTGCTCCCTCGACTGCATCATGAAGGGATANAACACCGGAGGCTGCCTGCATCATGAAGGGATACAACACCGGTAGCTGCGTTAATGGAAACTGCCAGTGTCGTCGTACCAGCGCTGCATCATGAAGGGATACAACACCGGTAGCTGCGTTAATGGAAACTGCCAGTGTCGTCGTACCAGCGGTTAAATGCATACTTATAGTTCCATCAAATTCGGTTTTCTAATCAAGTCAAAACTTTGAAGAACAATCCA…	783	1.39e-56	97.3	1111
nasonin-6	GL277538.1		1 to 635	ACAATCTGCAGCTGTATTCGAACGATCAACATTAACGCCAACATATCAGTAATTAATCCAATAAAATGAAGTTCCTTTTCGCCTTTTTTCTCATCGTAGCTGTAACTTCCGTCGAAGAGTTTACGCGCAATGCGATGACAACAGGTGTAACTCCGGCTGCAGAAGTCAAGGAAATATCATAGGAGTATGCAGAAAAGATGACTCCTGTCTATGTGTGGCAGAGCTCCGCCGAAATGCGATTCCAACGAGTGCGACTCCGGCTGCAAAAGCCGTGGAAATATTCTGGGAAGATGCAATGGAGATTATCTCTGCGAGTGTGGCTCCAAAATGCGATTCCAACGAGTGTGACTCAGGCTGCAAAAGCCGTGGAAATGCTCTGGGAAGATGCAAGGGAGATTC…	642	1.87e-50	97.3	650
nahymenoptaecin-2 precursor	GL275524.1		1 to 1539	ATGAAAGCAGTCCTCCCACTTCTCGCCTTTGCGGCTACGGTTATCGTAGTGTCTGCCAACATCAGGCCCAGGCCGACAGCGAGACCGCCGTACATAAACCGACCGCCAAACCCGTTCAAGCCTCGCTGGAAGCGTGAAGCTTCTCCGCAGAACGGACACATTAGCGTTACTGGAAGCAAGGACCTCAGTGGCCCGGAGAGACGTCCATCTTGGAATGTCGACTACCAGCACAACATCTGGCAGAGCAAGAACGGCCAGATCACCGCTGGAGGTGGTGCCCAGAAGCTGCCGGGCCAAAGATGGGAACCGACTGTTGGAATTCAGGGAAGCTGGCGCTTCAAACGTGAGGCCAACCCTGGTGACCATGGTTCCGTCAGCCTTACGCAAATCAAGCCCCTC…	1539	0	98.1	1546
hypothetical protein	GL276769.1		1 to 412	TGTCATTCTACCGTAAAGTGCAACGCAAAAGTCAACATGAAAGTCCTGCTGTTTCTCGTGGTCATGGTAGCCATGATGGCTGTGCTGATGGCTCAAGAGAAAACGATCTCCCCGAAGAAGGAGTCAAATGTACTCGAGGTGAATCATTCCATTGTTTCCTCAAGTGTATCACTCAAGGTAAAGTGCCCCAAAGCTGTAACAGAGTAAACGGTACAGTCAACTGCATCTGCAGAGCAATCAACGCTACCAGCCCGGAATAAAAGCGTTTCCATCAATATTCTACCAAAATGAGTCATCCGAATAAAACCTGCCAATGATAAAAAATGCGCTTCAAAATTGACGCAACACCGGAAAAGTATTCGTACGTTAGTATTATTTTATCCGAATAAAGTGCATAGC…	414	9.21e-70	98.6	412
hypothetical protein	GL277560.1		1 to 619	TCAGACTGAACAATTCTCTCAATTTTGTTTAACATGAAGTTCCAGTTGTTCTTGGCGTTTGCCCTCTTACTGGCCATTATCGGAAGCATGCCAGGGAAAATTGCATCAGCCTCTTCAGTCCCGAGACCTGCCGTAGGCTGTGCGAAACCGATAGTGCCATCTGCAGGTTCCAAAGTTCCAAGTGCGACTGCTACACGCCAAGCTCCAACTATTAACTATCAACGTCAAATTGTCAATTGTCAAACGCATAGTTTTGCTTTGTTCCTTTGTAGAATTAAATAAGGTCACAATCAATCGTGATATTCATGCTCACAACTGAGTTGGGGAAATTCCAATCGCGCTGAATACGAGAAACCGTGTTTCATAGTCAACAAGCTTTTTCGCTATATGCATGTATTT…	616	0	93.4	619
hypothetical protein	GL277948.1		37 to 799	CTCGTGTGCGGAATCCTAGCCACAGTGACGGCCGCCCCGACGCCCGGAGGACACCACCACGAACACCACATCATTCACGTTCCGTACCACGTGCATACGGTACACCACCACCACGTGAAGAAGGTCCACGTCCCGGTCCATCACGTCGAGAAGGTTCACGTGCCCGTACCTGTGCACCACGTCGAGAAGGTTCACGTGCCGGTGCCCTACCCAGTCGTCGAGAAGGTCCACGTGCCCGTCCACATCCCCGTCCATCATGAGAAGCCCCATCACGAAGGCTGGGGCTGGGATTAGTGAGAGTACCCCCCTGTTTTAAGTGTATTATTATTGTTGGATATTGTCAAGTAGATGCAGCAGCCCCGCGTTAACGCTCGACTAAGTGTTAAAATTCTGGATTTT…	765	3.54e-148	96.6	799
hypothetical protein	GL274505.1		1 to 539	GGCAGTCACTTGTAACTCTTGGCTTAATTGACAGTAAAAATCTCGAAGTAGCGAGCGCTGAAGCGAGAGAGTACGCAAAGAAAAAAACTATAAAAATGGCAAGATTCGTCTACCTCCTCCTCGCCATCGTGCTCACGGCAACCATGGTTATGGCCGTCGAGAAGAAATGCAGCCCTTGGCTGGGATACTGTCAGAGTCATGAGGGATGCTGCCGTCACTTCACCTGCTCCACATACCAGGCTAAATGCGTCCCCGTCGGAGGACTCATCATTCCCGGCAAAGACACGAGGCCACTCGGAGATGGACCTTTCCCACCCAGGGGTATCTTCCCAGCATTCGATGCAGTTTACCCTCATCTCACGCAATAATGACTTTTTTAATTCAGTATTACACTAGGTA…	505	1.11e-106	97	539
hypothetical protein	GL274505.1		1 to 739	TAATCATTTACGGAAATTAATTCGTAAACAAAGAAATTCGTTGAAATCGTGCGTAACGCTTACACGTGGGAAACGAGATCGTACTACATTTAATAACAACAACAAAGAAACCAGTTAGATTGTAGACATAAATGATGGAGCGTAAAACCCGGGATTGGAAGCCTTACTCGTATAAGTAGGAAACTCCCAACTCGACAGACTCAGTCGAATACGAACAGTTGAGCAGTTTGTGTCTCGTGATTGAGAAGTGAATTAACGTGTCTTATCAAAAAAGTAAAGCAATACATTATACAAAATGTCGAAGGTTATACTGTTCGCTCTGGTCGTCTTACTGGCAACGACTTTAATCTCAGCTGCCACGAGTGATAATAAGTGCGGACGACATGGTGATCCTTGTGT…	738	3.67e-144	98.9	739
hypothetical protein	GL275765.1		12 to 528	AGATGTACCTGAAGTACTGGATCCTCCTGGCAGCCCTGCTGGCCGTGGCTTACGCCGCGATCGAGCCTCTCGACCTGGTAGCCGAGGAGTCGCAGGAACAACCGGCCGGACAGCATGTGCGGCAGAAGAGGTTCCTTCTGCTTAAGAAGGCTATCCTCGCCAAGAAGGCCCTGGCTATCGGCGGTGCCGTCGGCCTTGGCGTTGGTCTCGTCAAGGCTAAGCACTTCGGCGGCGGTTTCGGAGGTGGTCACGGAGGTGGTCACGGTGGTGGCTGGCAGAAGCCCATAATCGTGCACGCTTACCCTGCCTCCCACTCATCCGGCTGGAGTAGCGGCGGTGGCGGCGGATGGCCCAGCGGCGGCGGCGGCGGCGGATGGTCTAGCGCAAGCAGTAACGCGT…	527	4.07e-84	96.9	530
beta-1,3-glucan-binding protein-like	GL275946.1		1 to 763	ATGAAATTTTTGCGTCAACAAGAAATATGGCTGGAACCATTGTACAAGAGCTACGATAAGCGCTACGCGAACGCGCGCATAAACCTGGGCCGGGTGCGTGGGAACGCGATACTAACCCGTCATGGCGAAAACCTGGGCGGCAAAACGCTGGAGTTTGGTGTGGGCAATGGTACCGGCGCCGACTTTTACGAGGAAACGGTCTCGAAGCTGCACAGGTCTGGCGAAGCCTGGAACAAGGACTTTCATACCTACAAGACCACTTGGTCGAGCAGCGGATTGACCTTTCACGTTGACGGCGAACTGGTCGGCAAGCTCGTGCCCACTGCAACTGGATGGTCCAGTCAAGACAACGTCGCTACTGTGAGCATGGCACCCTTCAATGAAAAGAGTTTTATCTCT…	765	2.01e-98	97.2	763
hypothetical protein	GL275765.1		1 to 1146	GGTGTTACAGCCAGAGGTGTGCCACAGTTAGTCGGTTTGGCTCGGCTGTGTATATAGTTTTGCTCGAGTTTGATTTTTCGTACGACGAGGATTTTTCGAAGTGTCCTGCGTGACACTTTGGTCTTGCCTTTGGAGTTTGGAGATGAACAGCCACATTATCTCCCTGTTGGTTCTACTCTCGACGGCCATTGTGTTCGCGGAGCTTGCCAAAGCCGATGTCGATATCGAGCAGCAACGGCGGCCCACCAGTCTCGAAGATGTTCACAACGTAGACGAGCTGAGCGAGAGCGTTGCGCCTGTGTCGAGGGATAAGAGGACGCTGTTCCTGAAGAAAAAGCTCCTCGGCGTTGGCGCCGTCGGATTCGGCCTGGGAGTCGGATTAGGAGCGATTAAAGGGTA…	1705	2.73e-113	98.1	1148
not on current assembly	GL276173.1		1 to 720	TTCGTCACTAGCAACATGGCAAGCAAACTGGTGGTAATCTTGGCTCTGGCAGCCGTAGTCGTTTCGGCGGCAGCCTACAAGCACGACAACGAGTACGACGGTCACCGTGGACACGGTGGACAGGGAGGTTTCGGAGGTCACGGAAGCCAGGGTGGTTTCGGAGGTGGTCACGGAAGCCAGGGTGGTTTCGGAGGTGGTCACGGTAGCCAAGGAGGTTTCGGTGGTGGTCACGGAAGCCAAGGAGGTTTCGGTGGTGGTCACGGAAGCCAGGGAGGCTTCGGAGGTCAAGGACAGGGACATGGTGGTCACGGAAGCCAGGGAGGCTTCGGAGGGCACGGACAGGGACATGGTGGCCAGGGAGGTTTCGGAGGTCACGGACAGGGACATGGTGGACAGGGA…	711	0	95.8	720
dicer-2	GL274307.1		84 to 4953	ACGAGTTGGATGGACGCTCTCAGATTCTCTGCAGAAACAAAACACTATAAAACATATGCCGGCTGACGGTATACTGCCTATGTAATTTCCAAGAAACTACGGAGCAAGCAGCAGGGACTGGATTGGCAGAAAACCATCGGAAAACATAAAACTCGTCCCGACCTGCATTGTGTAGCTTGATAGAACGTCGACTTGGTGCAAAATCGCAGGATCAGCCAGATGCAATTTGACGTGGTGTGTGCAGCTTACACATACCTTTTTGCAAAAGAGGGAATCCCGCAAGCTTCACGATCCAAGATAGACACGATAGCTTGTCAGTGCACGACTGCACGTAGGACGCGCGTGTTCATCCGGAGCAGTTGGTGCTGCATAAATTCCCGAGGAATACTCCGAATTAAA…	4450	1.71e-100	98.5	4953
luciferin 4-monooxygenase	GL274726.1		1 to 1543	ATGTATAAAGCTCTAGTGGAATCAATAGGTTTATATGGGGCTGAAATCTGGGGATGGGANCTGAGAGTAGAGTTAGATAGGGAAAGTAGAAGATTTTGTCATTGAAAACAAAATTATGAAAAGTGTGCACTTAGATTTTGATCTAACTCATAGTATTGGCAAACACACTTAGTAGCAGGCCACATCATATAGGCCAGGTAAGCAGAAACGAAAAATTGCAGTATTCGTTGCGCAATATGGCTTAAATGGCAGGGATTAAATGCAAATGACATTGTTGTTGTTTGCTCTAAAAATAATATAGATCTATATGCTCCAATTTTTGGAACGTTTTATGCTGGAAGCATCTTTTCTGGGTGGAACCCGTTTGCTCTGCCTTTAACTGCTAAGATGGAAAATGTT…	1512	2.26e-85	96.6	1560
hypothetical protein	GL277646.1		1 to 668	GCGCATGAGAATAGCAGCGTGATGTTAAAATAAAAGCAATCATGTGTGCTGATAAACGGGAAGCCCCGTTTGAGAAATAGCTGTGTGTGGTTCGTCTATTTACTGTCATCTGGGAATCCCGCATATGCTTTGTAAAACTGGTAGCCTTGCAGAGTTTAAATAGCGGCGAGTGTTAACGCTAAGCATCATTCGATTCGCAGCTATCGAACTGTCAAGTACGAGCGACAACTAAAACAAAAATGAAATCCTTATACTTTTTGCTTCTCATCGCCTGCATGATGATTGCGCAAGAGCGTATGGAAGTTGTAATTTCAACGATTGCAGTCCATTCTGCCAGTACAAGAAATGCCAAGGAACCAGATGCGTATGTGACACGAGATTCATAGCGCAAAACCAAAA…	664	0	98.1	668
not on current assembly	GL276173.1		15 to 330	GACGTTGATGGTTTTCATCGCGCTATGGGCGAGCTTAGCCTCTACTCTACCCACGAGCGTAGATCCCGTAAAAACTATAACGAACGTGGAACTACCCGATAAGCACGACGCGGAGGCAGAAAAGACTGACGATTTAGAAACCGACGCTACTTTCTGGGGGAGGCTACGGAGGCTGGGGTAGGCGACGTTACTACGGCGGGTGGGGGGGGCGACCCTACTACCACGGCTGGGGAGGCCGGGGTTACGGTTGGGGAGGAGGATACTACGGCGGAGGCTGGGGAGGTCGTTATGGAGGCTGGGGTGGATACTACTGGTGA	317	1.71e-74	97.5	330
NF-kappa-B inhibitor cactus 1	GL275162.1		2 to 1130	AGACATCGGTATACGGGCAGCGTATAAAATCTGTGTCCAGTGGTGTGCGAAAAGAAGCTTGTGCGCCGTGTTCGCCGATCGTATCATGTGGAGTAAGGAAAAATCGGCAGCGCAGACCAGGAAAATCGAGAGCCAGATAAGCGGCCAGGCAGACTCGGGTTTCCAGTCACTCGCCGACAGTTGCACAGCATCCATGAGGGCCTGCAGTGAGAACGCCGAGTGCGAGCTCAGCGAGACCTTCATTCGCACTTTAAGTTTAAAGCACACGAACATCAACAACTTGGACATGGGCAAGTCGCAGCACAAATCCGAGCCGATCGTCAACGCGAATCGGCTCGACTGTCCGTGGAGCGAGATCGACAGTGACATGCCCCAGAACTCCTACGAGTTCTTCTACAA…	1138	0	96.9	1130
protein pellino-like	GL277538.1		12 to 1128	CGCAATCATCGGTTTTAACGGACGTCTGCCCCGGGGAGATCGTGGCAGGAAACGAAGCAAGATCACTCTATACAAGCTGCCAGAAGCCAATGGAATCAAACTGACGAAAAACATCGTTGATACGAAGACATCCGATCCAGAACTCTTCCGAAGTGACATCCACTCCATCACTTATGCGTTTTCGGACTCAACAGCTGTTATTATGGAGTACGACAGTGACAAGGATACAGACATGTTTCAAGTTGGGCGATCATCGACAGCATCAATAGACTTCGTGATTATGGAGACCGCTTCAACCCAAAGAAATATTATGATGTCACGCAGTTCTGTAAGTCGATTTGCTTGCCGAATTCTGATCGACAGGCAAAATCTTAAAATAGCAAAAATCTTTGCTGGAGG…	1117	0	97.4	1128
peptidoglycan-recognition protein SC2-like	GL277030.1		1 to 1119	GCATTCGTGCGTGCGCATAAGCTGGAGCTTGTAAAAATTGCATAAATTCTTTACAACTTAATTTTTGTACAATGTGGATTCATTTTCATGCTTAATATTTAAGAGTAGTCTCAAATCAGTCAGCTCTTGTGAAAATGGAAATCCCGCCGTTACTGCGCTTCTTCTTTGTCATTGGACTTTTGTTAGGTGTTGTTTTGACTGCGCCTGATGAGCGTGAGCCAGTAGTAGAGCCGGCAATGACTTCTCGAAGAAGCTCGAGACAGTCCGCATAATCAGCCGGTCTCAGTGGGGTGCCCAGCCGGCCACCGACAAACCGCGTCATCTGAAAGTCCAGCCAGCACCTCTGGCGATCATAAGCCACACCGGCACCCAGTCCTGCTACAACGAGGCCAAGTGCAT…	1118	0	98.1	1119
not on current assembly	GL274622.1		1 to 219	ATGTTCTTCAAACTCTTCGTCTTCGCTGTTGTCCTGGTGGCATTCGTCTGCGCCAACCCAGAGCCACAACCAGGTTACGCTGCTGGTCTCGGCTACTGTGCCCGTAGCTTTGGATACGGCGGTTATAGAGCTCGCACCATCGGCTACGGTAGATACGCCGGCGGATATGGCGGCTATGGCCGTGGCTATGGATTCGCGGGACGCAGCTTCTACGGTTAA	219	2.95e-108	97.7	219
toll-like receptor 4	GL277752.1		1 to 3129	CGAGCCACGTCGCCGATCGCTCGGCGATTCGGCCGGCTCTTTTTTTTNNTNTATATCTCGCGTCTCTCTGNNNNNNNNNNNTTTGCCGGTGTACACGTGTGCCGGCAACACACGCGAACTCGCTATTTATAACGGTAAGTTTCGATTTAGTTCGGGANNNNNNNNNNNACGATGAAAAAAAAAACGCCGGTGTGCTAGCTCTCCCTCTATACTGTCTCGCGTTCGGCATTTTGGCGCGATTNNNNNNNNNNTGTGTGTTATTGTCGTACAGTGCTGTTCTCTGGATCCCTCCGGCGTAATATTGCGCTCTGCGCTACTGGACGACGCCGATCGTAATAAATGGACCCGAGGCTCCGCACTATGCTCCACAATGGTTCGGCTCAAGTGCAACTGCCCACC…	3138	6.56e-158	97.6	3801
gelsolin	GL275162.1		79 to 2150	GACGACGCGAGCAGCTGCTCGGACGAGTCCAGCGGTGCGGAGATCTTCAAGAGCATCCCCAAGGCCAGCACTGCCTTCTGCATCTGGAAAATCGAGGAGGGACTCAGGACCATCTCGCTGGGTAGAACAAAGGTGGGAACGTTCCTCTCGGACTCGGCTTACTTGATCTACGCTGCCTCGGCCAGAGACGGCGCGCTTCCCTATCCCGGCATGCCGAAAAGAGCTGAAGGACAGCCAGGCGGTGCGGGCCGTCCACTTCTGGGTCGGCGCTGACTGCGACTCGAGCGTGTCCGGAGCCGCGGCCCTGCGCGCCGCCGAACTCGACTCCCAGCTCGGCGCGACGATCCTCCTCCGAGAGGCCCAGGGCCGGGAGAGTCCCCGCTTCCTGGCCTACTTCCG…	2088	2.25e-90	97.9	2499
N-acetylmuramoyl-L-alanine amidase-like	GL274950.1		167 to 729	GCCGAAGGTCTGTGCCCCCGCATCGTGAGCCGAGCCGAGTGGAAGGCGCGCAAGCCCCTGGAGCGCGAGCCCCTGCCGACGACGCCGACCCCCTACGTGGTGGTCCACCACGGCGGAGTCTCGAGCTACTGCCAGGACCAGCCGAGCTGCTCGGCCATAGTGCGCTCCTACCAGAACATGCACCTCGACGAGCGCGGCTGGGCCGACATCGGCTACCACTTCCTCGTCGGCGAGGACGGAAACGTGTACGAGGGCCGGGGCTGGGAGCTCGTCGGGGCCCACGCGCCGGGCTACAACGGCCAGGGCATCGGCGTCTGCCTGATCGGCAACTTTGTCGGATTTCCTGCCGAACGAGGACGCGCTGCGGGCCCTGCGCTCGCTCATCAGCTGCGGCGTCGC…	564	2.18e-172	96.9	998
not on current assembly	GL277752.1		1 to 321	ATGAAGGTCCTCGTGGTTCTCGCTGTCTGCGCGCTAGTCGCCAGTGCTTATGGAGCGAGTCTCGGCGTTTTCGATGGTCCGGTTTATTTTGGACCTGTCCCTCGTAGAGCAGCCCTCTTTCAGAGCTCGTCGCTTCACCTGCGACGTCTTGTCCTTCAAGAGCATGTGGGTCTCGCCGAATCACTCGGCCTGTGCCGTCAGGTGTCTAGCCCAGCGTCGCAAGGGAGGAAAGTGCAAGAACGGTGTCTGCGTCTGCCGATGA	262	9.11e-84	98.2	321
not on current assembly	GL277752.1		1 to 357	ATGAAGGTCCTCGTTGTTTTGGCTGCTTGCGCTGTTTTCGCCGGAGCTTTCGGCGCTACTACGATTCGCGATGGCTACGAGGATCCCATCTTTGAAATTCAGGAGACGACATCAAGCAAGACGGCGATAACGCCGAGACGGTCGACGCCACGGACGATCTCTCCCCAATCAAGGAGTCTTCAGACGATCCGACAGAGCTCGTACAGCCTTCGTACAGAGCTCGTCGCTTCTCCTGCGACGTCCTGTCCTTCCAGAGCAAGTGGGTCTCGCCGAATCACTCGGCCTGTGCCGTCAGGTGTCTAGCCCAGCGTCGCAAGGGAGGAAAGTGCAAGAACGGAGTCTGCGTCTGCCGATAA	356	6.88e-41	97.9	357
hypothetical protein	GL275793.1		24 to 2620	GAGGCTCGCGAAGGTCAGGGGGATGACGAGGCGGCCGAGTGNCTNAAGACGCTCGAGAGCGCCGCCGCGATGATCCTCCTCAGGTTCTTCTTCAACGTCGCTGCTGCTGCTGNNNNNNNNNNNNNNNCCGCCGGCGCAGCGATAGGACACGACGCGCCGATCGGCCCGAACGACCGGAGAGAACTGGCGCGTGACTATTAGTNNNNNNNNNNNNNNNNNNNAGAGGGCTCGACTACTGCGATACTCGTATATACTTTGGATAGAATGATTACGAGGTGGAGCAGCTCGTGAGGTCGGCTGAGCACTTATCGGAANNNNCTACGTTGCTCTGATCCGACGAACGGGACAATATGGGCAATGGCATGAATAAGGTAGGTTCTGCCTGGCCTGTACGTGGGC…	2233	2.36e-90	97.3	2620
laccase-4-like	GL273943.1		1 to 1824	ATGTCGATGCCTGACCTGCGTTTAATTGCTGTTCTACTTGTTGCATGCGGCGCACGGCTGTGCACTGTTGATGCTGCATCTGAGCCCGCCGAGGGAAGCGAATATGACGATCCGGACAAGATCGGCCTACTGACTCAAAGCTACGGCATGGGCTTACCGTGGGCTTACCGGACGACGAGGTGGACTGGTCCCGTCATCCCTGCCGCAGGCAATGCCGCTCCGACCGAGAACCTCTGACCTGCCGCTATGGCCTGACATTGCCCGCGAAACCTGACCGATTGCTCCAGACCACACTGTATTCCAGGGGACGGCACCGAGAAAATGGTCATCGTGGCGAACAAGAAGCTTCCGGGACTCTCGATCGAGGAGGTATGCAAAGGCGACGGTCTGCTGGTGGAC…	931	3.67e-55	97.2	2024
hypothetical protein	GL275079.1		50 to 345	ATGAGATTCCTCCGCTACATCTGGCTCCTCGTCGTGGCTCTTCTCATCTGCGCCGGTGCTCAAGCCAAATGCACCGAGGACGAGTGCAGGGAAGCTTGCAAGCACGTCTAAAGCATTCCCGGCGGCAAGGAGGGAAAGTACTGCGTTGACGGTTCCTGCAGATGTGCCTAGCTCAAGCCTTGAACTGTTTCTTTCTTTCTTTATTTTTCTGTAAATCGCATTGTTTTTTCTCGTCGTCTTTTNTTGTTGTTGTTTGCGCTCTTAATAAAAGCATCATGATTTTCTTATTCTGAA	294	1.43e-104	96.2	345
dorsal switch protein 1	GL276796.1		11 to 4586	AGACCAACTTCATTGTAGTATCAGAAGGAGACGATAGACAACGACGATATAATTCTCATAGTTTGAGACCTCGGCAATTAGATACTTGCGATACTTGCTGCCCAGCAGCAGCAGCAACAGCAGAACCAGCTGCACCAGCACCTGCTCAACCAGCAGGCGGCCGCACAGCAGCAGGCCCAGCAGCAGGCCCAGCAGCAGGCGCAGCAGCAGGCACAGCAGCAGGCCCAGCAGCAAGCGCAGCAGCAGCAGCTGAGCCAGCACCACCAGGACATCGTGAGGAGCACCGCCGCCGCCGCGGCGACGCAGCAGCTCTTCTCCTACAAGATGGCCTCCAGCTTCCAGAACCCCGCGACGACGGGCGCCCAGAGCAGCCCGGTCTCGAGCAGCAGCCCCGTCGCC…	4539	1.09e-90	98.1	4586
spatzle 1	GL275162.1		1 to 1132	ATGAAGAGGATTGTCCTGCTGCTGTTTGTAGTTTCGGTGGTAGCGAACGAGGCCGAGGCACTTCCCCAGCTGATCATACCCGTCCAAAATTCTTCGCGATCGGAGTCGGGCTTCTACGTGCAACGGAAAATCTTGTCCCACAGGAACTTCGGCTGCGAGTGGAGATGACACCTCCGGCAGGACGGATGCGGGAAAAATCATTTTTCCGTCGGACGACGGAGACTTCCCGACGCCTCAGTTTCCGGTTCGTCCGCACGCCGGCTGCGAGAACTCGACCTTCTGCGAGAACACGCCCAACTATCCCAAGGAGTACCTGCAAGCCGCTCTGAGGACGAACAAGGATCTCAAGTTCTTCTCCAGCGATGATCTGGTATCGAATGTCCGTCCTGCCCGACGTGC…	1155	1.8e-48	98.7	1132
hisnavicin-2	GL277768.1		1 to 1097	GGCCCATCGCACAAGATAAACATACACCTCCTTTCCTTTACTCAAGTTGAGTATATCTCTCTCACTAGACAACATGAAGCTGATCATTGTTCTGTTCGCCGTCGTCGTGGCCGCCAGCGCCTTCCCAGGCTACGAGAGCATCATCATGAGGAACACGTCCACGCCATCCAGGTACCCCAGCCGCACCCGATTCCCCCGATTCACCCCAAGCCCCTCCACCTGAAGGTCCACAGCCAGGCCCACCAGTTCCACTACCACGACGCCAAGCCCCACCACCCCCACCTCATCGGCTACGAGGTCTACCATGAGCCCAAGGCTGAGATCAAGCACGTCCATGGACACCACTCTTCCTGGTAAATCGTAGCAGCGTAACCGGAGCCGCCGCCGAGAGAAGATAAC…	1100	0	97.6	1097
JNK-interacting protein 1-like	GL277768.1		1 to 3180	ATGGCCGATTCCGAGTTCGAGCAGTTCCGTTACTACTTCGAGCGACTGCCCCAGCACCTGAAAGCGCCGATATCCAATTACACAATTTCAGACTCGTTCACGATGTCATGCTGGACGACTCGCCGACCTCGTCTCAGGGCAGCGACGCCGAGGTTGGCAGCAGGTCAGCCGGTGGTGTGGCCGGTGATTCCGAGGACGAGGAGGTCGTGGTGCTGCACAGGCACGAAGCGCACAGTGGACACAGCTCCGCGGACGACAGCGAAGACTGCGAGCAGATGTGCTGCTCGTCCATCGTCGCCGACAGCGATTTCAGGTATGGCTCCGATCTTNTGACTCGTTTTTCTGGGATCGGATTAGCTTGTTCGCCGGGCTGAGCAGTGGTGGNNNNNNNNNNNNNNN…	3191	5.96e-99	96.2	3180
CREB binding protein	GL276173.1		1 to 12230	ATTTTGCCCTGACAAGCAAGCGGCGGCCATCGTCTTTCTCGCGCGCCGCCGTCGACGAGAGAGAGAGGGAGCTCCGAGAGCCGCGGCAGCGCAAAAAGCATCGCGCGTGCAAGAGAGAGTGAGCGCGAGAGAGAGATAGAGACACCCACACGGCACTGGCAGGCAGCAGGCATCAGCAGCGAGCGCAGCAGACACGTATACACAAATACAGAGCGCAGTCGCAAGAGCGCGAGAGAGAAAGAGCGAGTGCGAGACTCTCGGCGCGCGCTCGGTTCCCCCGTGCTCTCAGTGTATATACCGCGAGAGAGCGCGTACAGTGTCTCTCGGAGCGAGCTGCTGGTGCACACACGGGAGAGAGCGCGCAAGAGTGGGTCTACACAGCGAGAGCGAGCGGAGAGA…	7884	1.63e-110	98.5	12324
protein argonaute-2-like	GL277538.1		16 to 2871	GAAGAAAACCAGCAGTTTGAAGAAACTTCTCCAACTGCATCTACATCATCGCCATTCGTAGGATCAGAAGACCAAGCTGACCCTTCTCAGTCCCAGTTGCAGCCCCAACATCCTCGGCAATCTCAGCCACAACCTGCAGATGTAGTTGAAGAAACGACTGAACTCTTATCAGAAATATCTTTGGAACCAGAAGCTGTTTCATCCGAATCTGAAACAGTAACACCCAATCTTACTGTACCTGCTGACATAGTCTACAAAGAAGTAGAGCAGATTCCAAAGCGTAAGGACCCTACGAAGGCTGGCACCATAGGACGTCCCATTACTGTAAAAACAAATATGATGGCCATTAATGTCAAACAGATGAATCCCAATGTTGTGCATTATGACGTGAAAATTGTG…	2591	5.34e-88	97.2	2871
hypothetical protein	GL276173.1		1 to 552	TTGGCCTACGCGAACGTTCGCACCGTTATTGTCTCCGAGAAGCTTCTCCTTACACTCGGAAATGCGTCCAAGCCTGGCACTTGTCCTCGTGGCTCTAGTAGCCTGCCTTCTCGTGCCGAGGGCCGAGGCGGGAATCTTCCTCCAGAAGGTGGGTCAGACGGCCAAGGACGTGGGCGAGAAGGTTCACGAGGGCGCGAAGAGAATCGAGACCGGAATCAAGAATATCTTCGGCCCCGACGGCAGCGAGGAAGACGTCAAGTCCTCGACTGCCGTCCCAGCCGTGCAGCCGGTGCCCGGAGCTGCTGACGAGACTCTGGGAACCACGACGCCCACGAACAGGAACATCATCAGCGGCGCCAAGAGATGCTTGCCCACCGAAGTGCTGTCTTCCGATGGTGA…	554	0	97.6	552
hypothetical protein	GL274178.1		1 to 673	GCGCGCGCACGCGGCGGCGGTCACTAACACAAGCACTCGCATCGCGATATACTGCGTCTTATCGTCCGAGGAGAGCAGATTTCGAGCGACGAATATAACGAGAGCCTAAGTGGCGGGAATTATCAGTACGTCGCTAGCTCTCGAGCCTACAACAAGTTCGGTAAAAAGTTTCTCAAGTGCAGCCGCCGATATGAAGCTCCTGATTTTCATGCTGTTGATCGTCGTTACCATGAGCGCCGCTCAATTGATCCCCAAGATCTTCGGAGAGCCGTGCAACGGAGCACAGAACGCGCTCTGCAGCACCAAGTGTCTCTTCGGCAACAAAATCTGCGTCAAGTCCGAGGCGAGTTTGGGCTACACCTGTACGTGTATCAACGCGTAGAAGAGCCGAGGCGCCGC…	672	0	96.7	673
hypothetical protein	GL277768.1		57 to 716	GCTGTTGCTCTCGCTGGTGGGCTTGGCCGTGGGTCAGGCGATCATTTCGAAGCCCGCGGAGACGAACGACGTCGGTGTCAATCAGGGTGTGCTGCATCAGGTGCCGCAAGAGGCCGTGGAACAAGCTGAGGATAAAAAAGTCGACAAGAGAAGCTACGGCTGGAACCCGTGGATCTGGCCGTCCTACGGTCACGGCTGGTCTGGACACGGTCACGGATGGTCCGGATATGGGTGGCCATCGTAGTATAGTCACGGATGGTCAGGACACGGCCACGGTTGGCACGGTGGATGGTCAGGACACGGACACGGCTGGCACGGTGGCTTGAGCTACGGTTGGCCCATCTACATAAGCAGCGGACACGGTTGGCATAGTCATGGTGGATGGCATAGCAAGTGGTG…	664	7.46e-120	92.4	737
hypothetical protein	GL277768.1		1 to 1002	GAGAGAGAGAGAGAGAGAGAGAAATACGGGGAGAAAGAAGGTACGTGTACTGAGAGAGCACGTATACGAGAGCGAGACTTGTAGGTATATAAGCTGGGCGTGACGGCTGCAGACTGCATCAGTTAGATCTCGACTAGCCCGTCTGAGCAGACTGAATCGATCCTTTTAGATACTTCAACAGCTTCTTATCAACATGAAGACCATCATCCTAATTGCCATAATCGCCGCTGTGGCTTCGCCCATCTACGCCGAAGAGGCTCTCGAGCCGAAGAAGCAAGAAAAGAGAGGACTCCTTGGCTTGGGATACGGCGGTTATTACTCCGGCCTCGGCGTTCATGGACTTGGCGGTTATGGAGGAGGCTACGGACATCTCGCCTCTCCTTCGGTCGTGTCCCACGG…	1021	6.23e-103	98	1002
hypothetical protein	GL275793.1		1 to 271	AACTGTTATTAAAAATGAACAAGAAACTGCTCCTCGTTCTTTTGGCCGTATTAACGATTGCAACTCTTTGTGCGGCTAACGAGTGCAACGTTGGGTATATAATACCGATTTCGAGTGCAAGAACAAGGATCAGTGCAACGATGTGTGCACAGCGCGCCTGAAGCGCTTCCGCTGTTTTCTAGTTGATACAGAATGCCATGACGAACGCACTTGTATTTGCCGTGGTAAACACCAGCAGCCGACGTAGATGATTTTTTTTTCAATGGTGCC	270	2.63e-87	98.3	278
hypothetical protein	GL275793.1		1 to 490	TATTACATAAAAATGAACACTAAAATTTTCCTACTTCTCCTGCTTTCGATCGGTTTCATGAGTTCGACCGTCTCTGCGGCCAAAGAATGTTCGTTACACATCCCCTTCACGTGTCGGGTAAAGGAACAGTGCACTGAGCCTTGCAAAGTGCGCCTCAGTTACGTATACCCGGGATGTTTACTGGACCAGCCAGAGTGTAGGGGCAGCGTTTGCGTTTGTCATGGTAAATACAGTTAGTAGTGCCTATACACTATAAGAATTTTTGTCAGAAACGTTTGTACGCTTAATAAAGCCTTGTAATATTGAATTTTCAATTAGTTTATTATATCGACTCCATTCCGACTGTCTCGACTAGGTAAAATATTAATTGCATCTCATTCACACAGGATTTTTTTTTCA…	489	0	97.2	503
nasonin-1 precursor	GL275593.1		1 to 444	CTGAGATCATCGATTTTGTATAAAATGTTCTGCCGTAGGAGAGCTAACACATAGCAGTACTTGTTTTGCTTTGAACAGAGTCTGAAGAATCGCTCGACTATTCGCAACCATGAAGGCTGTATACTTCGTTTTCCTGCTCGTCGCTGCCCTGGCTTACTTCACGTCCAACGTTGCTGCTGGCTTGCAACGACCGTGACTGTTCGCTCGACTGCATCATGAAGGGCTACAACACTGGTAGTTGCGTTCGTGGAAGCTGTCAGTGCCGTCGTACCAGCGGTTAAAAAGATACCAACACAAGATCTTCTGAACATTGATGGAAGAATTAGACATATTTTCAAAATTATATCCATTTTTATTTTGATATTTTATATTGACCACAAAAAAACAATACTATCGCAT…	446	2.74e-136	98.9	444
hypothetical protein	GL274178.1		1 to 342	GTTGAAGTGTGAACCTGAGAAGTTACAATGAAGTGTTTAATTTACTTTATGCTCGTCGTAGCTCTTGCTGTTACTGAAAGTAATTAAATGTCAGGACTGTACTTTTTTACAATCGTTGAACTGCCCTTGGCAATGTTTCTCGTCCCCAAGTTGGATGTGCCATCAAGATTTAGTAACTAAGAGTGGAGTATGTATCTGCCAAGGTAGCGTTGCTAGTAACCTTAATGACGTCGTTGAAAGACCATCGGTACAGTACCCTTATAAGACATCAGACTTTACATAAATGTATTTGAATCTACAAAAATGCCTTCGGGTCTCAGATATCAATAAAGTTTGTCAATTGTAA	346	2.63e-128	97	342
signal tranducing adapter molecule 1-like	GL277224.1		1 to 3853	GTCGCAGAGACGAGTCGGGGCCAGCAGGGGGCAGCGGTGCTCGGGTGGCGCATAGGTAATAGCTGGCCTGCGTTTGATAGCTGTACGCGAATCGCTGTTTACGAGGCCGAATATCAGCTGGAGCCTGGAGTGCAGCGAGGCCAGCCTGGCCAGCTCTGACAGTTCCGCAGTTTCTGCAGGCAGAGATCAAGTGCAGTCGCCGTCGAGGCTAGTTGTTCCGCGAAAATGATGAGCTTTCTCTCGGGTTCTCAACCTTTCGACGCTGACGTCGGAAAAGGCGACCAGCGACAAGAGCACCTCTGAGGACTGGGCTCTGATTATGGAAATATGCGATAAGGTAGGGAATTCGCCTCAGCACGCCAAAGACTGTCTGCGTTCGATTGTCAAGAGATTGTTTGC…	3853	2.74e-98	97.7	3853
gram-negative bacteria-binding protein 2	GL276173.1		1 to 1607	ATGTTTACTCTATCGGCTTTTCGATTTTTCCTGTTTTTCCTGATATCGGCACATCTTTCGAACGCTCAGTATGTACCTCCAGAGGCACTGGTCCAACCGCTAAAGCCGGTTGGCCTCCGTATTTCCATACCAGCAGATGAACCGGGCATTACCTTGGTAGCCTTTCACGTAAAGTTCAATCAAGAATTCAATGGACTTGAGGCTGGTACCATAGCACGAGACATCATGAAGCCGAAGAATGGCCGCTGGACTTATGAAGACAAAAGTACGAGGTTGAATGAAAACGATGTTATTTACTACTGGGTACACGTTGTTTACAATCGACTTGGATATAATCTGCTTGAACAAGAGCACACAGTAACGACTTCTTTAATTACAAGGGTAAAATACAACCTCAGA…	1614	6.22e-108	97	1607
toll-like receptor 6	GL274067.1		26 to 3762	TGCTGCCGCTGCTGTTGCTGCTATTGCTGCTGATCGCGGCCAGTCACGTGGAGTCGTCCACCGCGACGACCAGTGGCACGAACCTCGCGCCACCCTCGTCCGCGGCTGTGCTGCGCTACCCGCGCTACTGCCACTGGGACTCGCCGAGCGAGGGCAGCCTCTACTGCCGGCAGAAGGAGCCGGCGAGCAGCGGACGCCTCAACCTGACCGAGCTGCCTGCCGAGTCGCTCATCTCGCTGACGCTCCTCTGCTACGAGCCCGTCGACGACGAGTACGGCGGCGACGACGGGGAACCGCTGCTGCCCGACAGGCGCGCTCCCCTCGCCGCCGAGGAGCTCGGCCACCTCTGGAGGCTGCGGGCGCTCAGGATAATCGGATGCCGAGTCGGCCGGCTCGCCG…	3737	0	98.6	3762
luciferase-like	GL274327.1		1 to 1887	ATGTACGAGAGCCTCTCATTGACGGATTTGAAACTTTTAACCGACTGTATGATGCTTTTGCTTACGAGAAATCCGGTGCCTAGAGATCCCCCACTCCCGGCCCCATACAGTATGTGTCATCAAAGAGTCAATCATTCCGGCAAAGGACATCCAGCCGCAGGAAGTCGTAGCCCTGAACAGCGAGCATCTTGGACAACCCAGCGACGTGGCTCCAGTTGCTGCCGCCCAAATAAAGTCGGGCTTCATCCACTCGCAGACGCAGAGACGCGGACAGAGNNAACCGACGGTATCAAGTTCAGAACACCAAGTTTACCATTGAAAACAATATCATAAAAGGCGTGGAAGAGCCATGCCCGATAAAAAATAAAAGCAATTTCGGTCAGGTTCTTTTCGATTCAA…	1893	1.7e-101	98.3	1887
hypothetical protein	GL276272.1		1 to 357	ATGAAGTTCCTAGCCAGTTTGTTGCTGCTTATTGTTGCCGGCATGGTAGCTGTTGATGCCTACGTACCAAAGATTCCGAAACCTCAACCAAACAAACCGAACTTTCCGTCGTTCCCAGGCCACGGTCCTTTCAACCCCCATGCTCGTTTCCCATGATCTCCCAAAGACAATGAAAATATTGTTTTCGACGCAAAGAAAGAAGGTGGAAAGACTCAGTGGAACGTAGAAGCTCAGCAGAAAGTTTGGGGCAATAAACACGGCAGCATTCACGTCAGTGCTGGAGCTGGCAAACAACCAGGTGGCAAACCTCAAGGACAAGTTGGAATCGGCGGATCCTTTAGCTGGGGAAAATAA	354	4.4e-101	97.1	357
